# Supplementary material for: The contribution of unstable housing to HIV and hepatitis C virus transmission among people who inject drugs globally, regionally, and at country level: a modelling study
Source: PubMed Central journal article supplement (PMC8848679; doi:10.1016/s2468-2667(21)00258-9), 2022-01-07
Supplement: NIHMS1777140-supplement-1.pdf [file NIHMS1777140-supplement-1.pdf]

# THE LANCET

## Public Health

### **Supplementary appendix**

This appendix formed part of the original submission and has been peer reviewed. We post it as supplied by the authors.

Supplement to: Stone J, Artenie A, Hickman M, et al. The contribution of unstable housing to HIV and hepatitis C virus transmission among people who inject drugs globally, regionally, and at country level: a modelling study. *Lancet Public Health* 2022; published online Jan 7. [https://doi.org/10.1016/S2468-2667\(21\)00258-9](https://doi.org/10.1016/S2468-2667(21)00258-9).

|                                                                                                                         |    |
|-------------------------------------------------------------------------------------------------------------------------|----|
| Model Equations.....                                                                                                    | 2  |
| Appendix Table 1: Data values used for each country, and their sources.....                                             | 3  |
| Appendix Table 2: Country-level tPAFs of Unstable Housing on HIV and HCV.....                                           | 8  |
| Appendix Figure 1: Scatter plot of the tPAFs of HIV and HCV.....                                                        | 13 |
| Appendix Figure 2: Scatter plot of the ratio between the median tPAF and cPAF and the HIV/HCV prevalence.....           | 14 |
| Appendix Figure 3: Results of the uncertainty analyses for the PAF of Unstable Housing on HIV transmission.....         | 15 |
| Appendix Figure 4: Results of the uncertainty analyses for the PAF of Unstable Housing on HCV transmission.....         | 16 |
| Appendix Table 3: Sensitivity analysis for the Regional & Global tPAFs of Unstable Housing on HIV.....                  | 17 |
| Appendix Table 4: Sensitivity analysis for the Regional & Global tPAFs of Unstable Housing on HCV.....                  | 18 |
| Appendix Table 5: Regional & Global tPAFs of Unstable Housing on HIV and HCV including countries with imputed data..... | 19 |
| Appendix Table 6: Sensitivity analysis for the country-level tPAFs of Unstable Housing on HIV.....                      | 20 |
| Appendix Table 7: Sensitivity analysis for the tPAFs of Unstable Housing on HCV.....                                    | 25 |
| Appendix Figure 5: Sensitivity analyses.....                                                                            | 30 |
| References.....                                                                                                         | 31 |

### Model Equations

Let  $S_k$  and  $I_k$  denote the number of PWID that are susceptible or infected over time, with subscript  $k$  denoting strata for not homeless ( $k = 0$ ) or currently homeless ( $k = 1$ ). Then the model can be described by the following equations:

$$\begin{aligned}\frac{dS_0}{dt} &= (1 - \rho_I)(1 - \rho_H)\theta - (\beta + \kappa + \mu)S_0 + \epsilon S_1 \\ \frac{dS_1}{dt} &= (1 - \rho_I)\rho_H\theta - (\eta\beta + \epsilon + \mu)S_1 + \kappa S_0 \\ \frac{dI_0}{dt} &= \rho_I(1 - \rho_H)\theta + \beta S_0 - (\mu_I + \mu + \kappa)I_0 + \epsilon I_1 \\ \frac{dI_1}{dt} &= \rho_I\rho_H\theta + \eta\beta S_1 - (\mu_I + \mu + \epsilon)I_1 + \kappa I_0\end{aligned}$$

Where,

- $\theta$  is the number of individuals that enter the model each year.
- $\rho_H$  is the proportion of individuals that are unstably housed when initiating injecting
- $\rho_I$  is the proportion of individuals that are infected when initiating injecting
- $\kappa$  is the rate at which PWID become unstably housed.
- $\epsilon$  is the rate at which unstably housed PWID stop being unstably housed.
- $\mu$  is the rate at which PWID cease injecting or die from non-disease related causes.
- $\mu_I$  is the rate at which infected PWID die from disease related causes.  $\mu_I = 0$  when modelling HCV.
- $\eta$  is the relative transmission risk if unstably housed compared to stably housed.
- And  $\beta$  is the force of infection given by:

$$\beta = \frac{I_0 + \eta I_1}{(S_0 + I_0) + \eta(S_1 + I_1)}$$

**Appendix Table 1: Data values used for each country, and their sources.**

| Country                         | PWID Population size       | Ref          | HIV Prevalence    | Ref          | HCV AB Prevalence | Ref          | % Unstably Housed | Ref          | Injecting duration | Ref          |
|---------------------------------|----------------------------|--------------|-------------------|--------------|-------------------|--------------|-------------------|--------------|--------------------|--------------|
| <b>Australasia</b>              | 115500 (83000-148000)      | <sup>1</sup> | 1.1% (0.8-1.4)    | <sup>1</sup> | 57.1% (52.7-61.5) | <sup>1</sup> | 16.5% (11.4-22.1) | <sup>1</sup> | 15.4               | <sup>2</sup> |
| Australia                       | 93000 (68000-118000)       | <sup>1</sup> | 1.3% (1-1.6)      | <sup>1</sup> | 53.5% (50.2-56.9) | <sup>1</sup> | 17.5% (12.5-22.5) | <sup>1</sup> | 15.4               | <sup>2</sup> |
| New Zealand                     | 22500 (15000-30000)        | <sup>1</sup> | 0.1% (0-0.8)      | <sup>1</sup> | 71.9% (63.2-80.6) | <sup>1</sup> | 12.6% (6.9-20.6)  | <sup>1</sup> |                    |              |
| <b>Caribbean</b>                | 79500 (53000-118000)       | <sup>1</sup> | 13.5% (8.3-19.1)  | <sup>1</sup> | 63.6% (54.3-72.6) | <sup>1</sup> | 21.5% (17.5-25.5) | <sup>1</sup> | 12.9               | <sup>2</sup> |
| Antigua & Barbuda               |                            |              |                   |              |                   |              |                   |              |                    |              |
| Bahamas                         |                            |              |                   |              |                   |              |                   |              |                    |              |
| Barbados                        |                            |              |                   |              |                   |              |                   |              |                    |              |
| Bermuda                         |                            |              |                   |              |                   |              |                   |              |                    |              |
| Comm. of Puerto Rico            | 28000 (19000-42000)        | <sup>1</sup> | 6% (3.7-9.3)      | <sup>1</sup> | 78.4% (73.5-82.8) | <sup>1</sup> | 21.5% (17.5-25.5) | <sup>1</sup> | 12.9               | <sup>2</sup> |
| Cuba                            |                            |              |                   |              |                   |              |                   |              |                    |              |
| Dominica                        |                            |              |                   |              |                   |              |                   |              |                    |              |
| Dominican Republic              |                            |              |                   |              |                   |              |                   |              |                    |              |
| Grenada                         |                            |              |                   |              |                   |              |                   |              |                    |              |
| Haiti                           |                            |              |                   |              |                   |              |                   |              |                    |              |
| Jamaica                         |                            |              |                   |              |                   |              |                   |              |                    |              |
| Saint Kitts & Nevis             |                            |              |                   |              |                   |              |                   |              |                    |              |
| Saint Lucia                     |                            |              |                   |              |                   |              |                   |              |                    |              |
| St Vincent & the Grenadines     |                            |              |                   |              |                   |              |                   |              |                    |              |
| Trinidad & Tobago               |                            |              |                   |              |                   |              |                   |              |                    |              |
| <b>Central Asia</b>             | 281500 (189500-416500)     | <sup>1</sup> | 10.5% (8.6-12.5)  | <sup>1</sup> | 38.6% (17.2-62.4) | <sup>1</sup> | 14.3% (11.7-17.2) | <sup>1</sup> | 5.7                | <sup>2</sup> |
| Kazakhstan                      | 112500 (75500-166000)      | <sup>1</sup> | 9.2% (8-10.4)     | <sup>1</sup> | 58.8% (54-63.6)   | <sup>1</sup> | 13.5% (10.9-16.5) | <sup>1</sup> | 5                  | <sup>2</sup> |
| Kyrgyzstan                      | 28500 (19000-42000)        | <sup>1</sup> | 12.4% (10.3-14.7) | <sup>1</sup> | 43.9% (40.6-47.2) | <sup>1</sup> | 17.6% (15.1-20.2) | <sup>1</sup> | 6.3                | <sup>2</sup> |
| Tajikistan                      | 23500 (16000-34500)        | <sup>1</sup> | 27% (21-33.7)     | <sup>1</sup> | 61.3% (56.8-65.6) | <sup>1</sup> |                   | <sup>1</sup> | 5.9                | <sup>2</sup> |
| Turkmenistan                    |                            |              |                   |              |                   |              |                   |              |                    |              |
| Uzbekistan                      | 94000 (63500-139000)       | <sup>1</sup> | 7.3% (5.8-9.1)    | <sup>1</sup> | 51.7% (46.8-56.6) | <sup>1</sup> |                   | <sup>1</sup> |                    |              |
| <b>East and South East Asia</b> | 3989000 (3041000-49555000) | <sup>1</sup> | 15.2% (9.9-20.4)  | <sup>1</sup> | 50.3% (37.7-62.8) | <sup>1</sup> | 8.8% (5.9-12.9)   | <sup>1</sup> | 7.4                | <sup>2</sup> |
| Brunei Darussalam               |                            |              |                   |              |                   |              |                   |              |                    |              |
| Cambodia                        | 10500 (9500-22500)         | <sup>1</sup> | 24.4% (17-33.1)   | <sup>1</sup> |                   | <sup>1</sup> | 17.6% (14.4-20.8) | <sup>1</sup> |                    |              |
| China                           | 2564000 (1964000-3164000)  | <sup>1</sup> | 12.4% (6.8-17.9)  | <sup>1</sup> | 43.1% (27.5-58.6) | <sup>1</sup> | 8.9% (6.3-12.2)   | <sup>1</sup> | 7.1                | <sup>2</sup> |
| Hong Kong (China)               |                            |              |                   |              | 85.4% (82.2-88.2) | <sup>1</sup> |                   | <sup>1</sup> | 17                 | <sup>2</sup> |
| Indonesia                       | 190500 (156000-225000)     | <sup>1</sup> | 44.5% (34-55)     | <sup>1</sup> | 89.2% (85.3-92.3) | <sup>1</sup> |                   | <sup>1</sup> | 7.1                | <sup>2</sup> |
| Japan                           | 368500 (281000-459000)     | <sup>1</sup> |                   | <sup>1</sup> | 64.8% (55-74.5)   | <sup>1</sup> |                   | <sup>1</sup> |                    |              |
| Lao PDR                         | 1661                       |              | 17.4% (7.8-31.4)  | <sup>1</sup> |                   |              |                   |              |                    |              |
| Malaysia                        | 281500 (233500-330000)     | <sup>1</sup> | 17.8% (16.6-19.1) | <sup>1</sup> | 67.1% (62.9-71.1) | <sup>1</sup> |                   |              | 13.9               | <sup>2</sup> |
| Mongolia                        |                            |              |                   |              |                   |              |                   |              |                    |              |
| Myanmar                         | 173500 (115500-235000)     | <sup>1</sup> | 23.4% (19-27.7)   | <sup>1</sup> | 29.5% (26.9-32.2) | <sup>1</sup> |                   | <sup>1</sup> | 3.4                | <sup>2</sup> |
| North Korea                     |                            |              |                   |              |                   |              |                   |              |                    |              |
| Philippines                     | 25500 (19000-32000)        | <sup>1</sup> | 20.3% (13-27.6)   | <sup>1</sup> | 35.2% (15.9-54.5) | <sup>1</sup> |                   | <sup>1</sup> | 6.8                | <sup>2</sup> |
| Republic of Korea               |                            |              | 0% (0-0)          | <sup>1</sup> | 48.4% (42.8-54.1) | <sup>1</sup> |                   | <sup>1</sup> | 4.8                | <sup>2</sup> |
| Singapore                       |                            |              |                   |              | 42.5% (39.1-45.9) | <sup>1</sup> |                   | <sup>1</sup> |                    |              |
| Taiwan                          |                            |              | 12.4% (8.1-16.8)  | <sup>1</sup> | 91% (89.5-92.4)   | <sup>1</sup> | 0.7% (0.3-1.3)    | <sup>1</sup> | 15.5               | <sup>2</sup> |
| Thailand                        | 51500 (16000-87000)        | <sup>1</sup> | 24.5% (17.4-31.7) | <sup>1</sup> | 88.5% (82.6-92.9) | <sup>1</sup> |                   | <sup>1</sup> |                    |              |
| Timor Leste                     | 500 (500-500)              | <sup>1</sup> |                   |              |                   |              |                   |              |                    |              |

| Country                               | PWID Population size      | Ref | HIV Prevalence    | Ref | HCV AB Prevalence | Ref | % Unstably Housed | Ref | Injecting duration | Ref |
|---------------------------------------|---------------------------|-----|-------------------|-----|-------------------|-----|-------------------|-----|--------------------|-----|
| Viet Nam                              | 161000 (123000-200500)    | 1   | 16.6% (13.1-20.1) | 1   | 58.3% (42.7-74)   | 1   | 8.6% (0.3-26.1)   | 1   | 5.8                | 2   |
| <b>Eastern Europe</b>                 | 3020000 (1653500-5008000) | 1   | 24.7% (15.6-33.9) | 1   | 64.7% (56.6-72.9) | 1   | 6.7% (4.4-9.2)    | 1   | 8.7                | 2   |
| Armenia                               | 13000 (9000-29000)        | 1   | 5.4% (2.2-8.5)    | 1   | 42.7% (29.3-56.1) | 1   |                   |     |                    |     |
| Azerbaijan                            | 43500 (34500-52000)       | 1   | 9.7% (5.6-13.8)   | 1   | 62.1% (47.1-77.2) | 1   |                   |     | 8.8                | 2   |
| Belarus                               | 40500 (15000-66000)       | 1   | 25.6% (17.9-33.2) | 1   | 58.3% (43.3-73.3) | 1   |                   |     | 10.9               | 2   |
| Bosnia & Herzegovina                  |                           |     | 0.3% (0-0.6)      | 1   | 39.9% (27.5-52.4) | 1   |                   |     | 15                 | 2   |
| Bulgaria                              | 18500 (15000-22500)       | 1   | 7% (3.2-10.8)     | 1   | 68.7% (64.3-73)   | 1   | 3.2% (2.4-3.9)    | 1   | 9                  | 2   |
| Czech Republic                        | 47000 (44500-49000)       | 1   | 0.3% (0.2-0.4)    | 1   | 18.3% (14.5-22.1) | 1   | 48.1% (41.9-54.9) | 1   |                    |     |
| Estonia                               | 8500 (6500-16000)         | 1   | 53.4% (44.4-62.5) | 1   | 79.2% (67.4-91)   | 1   |                   |     | 8.1                | 2   |
| Georgia                               | 115000 (13000-217000)     | 1   | 2.2% (1.5-2.9)    | 1   | 69.1% (58-80.2)   | 1   | 2.8% (1-5.9)      | 1   | 14.1               | 2   |
| Hungary                               | 4000 (2000-6000)          | 1   | 0.2% (0-0.4)      | 1   | 46.6% (30.4-62.8) | 1   | 19.8% (6.6-32.9)  | 1   | 9.6                | 2   |
| Latvia                                | 14000 (11000-18000)       | 1   | 26.9% (24.1-29.6) | 1   | 74.4% (67.6-81.2) | 1   | 1.2% (0.4-2.8)    | 1   | 9.1                | 2   |
| Lithuania                             | 5000 (2500-8000)          | 1   | 8% (1.7-14.4)     | 1   | 41.1% (38.1-44.2) | 1   | 6% (3.9-8.8)      | 1   | 10                 | 2   |
| Moldova                               | 12000 (7500-16500)        | 1   | 29.5% (12.9-46)   | 1   | 50.1% (34.1-66.1) | 1   | 7.1% (4.7-10.4)   | 1   | 12.7               | 2   |
| Poland                                |                           |     | 18% (15.3-20.9)   | 1   | 58.7% (55.1-62.2) | 1   | 18.4% (16.2-20.5) | 1   | 14.4               | 2   |
| Romania                               | 81500 (60500-110000)      | 1   | 20.5% (7-34.1)    | 1   | 83.8% (80.6-87.1) | 1   | 16.6% (1.9-31.3)  | 1   | 9.8                | 2   |
| Russian Federation                    | 1881000 (1028500-3114000) | 1   | 30.4% (17.9-43)   | 1   | 68.7% (59.6-77.9) | 1   | 4.4% (2.2-6.6)    | 1   | 7.6                | 2   |
| Slovakia                              | 20000 (14500-36000)       | 1   | 0.01% (0-0.03)    | 1   | 56.1% (35.6-76.7) | 1   |                   |     |                    |     |
| Ukraine                               | 319500 (172000-590500)    | 1   | 19.1% (16.1-22.2) | 1   | 53.9% (49.2-58.7) | 1   | 0.4% (0.2-0.8)    | 1   | 12.2               | 2   |
| <b>Latin America</b>                  | 1823000 (1392000-2380000) | 1   | 35.7% (15-56.6)   | 1   | 61.9% (58.9-64.9) | 1   | 19.6% (13-26.3)   | 1   | 16.1               | 2   |
| Argentina                             | 80500 (79000-82500)       | 1   | 49.7% (35.4-64)   | 1   | 54.6% (51.1-58.1) | 1   |                   |     |                    |     |
| Belize                                |                           |     |                   |     |                   |     |                   |     |                    |     |
| Bolivia                               |                           |     |                   |     |                   |     |                   |     |                    |     |
| Brazil                                | 962000 (734500-1256000)   | 1   | 48% (18-78)       | 1   | 63.9% (60.5-67.3) | 1   |                   |     |                    |     |
| Chile                                 | 47000 (36000-61500)       | 1   |                   |     |                   |     |                   |     |                    |     |
| Colombia                              |                           |     | 4.6% (2.7-6.4)    | 1   | 28.8% (26.2-31.6) | 1   |                   |     | 3                  | 2   |
| Costa Rica                            |                           |     |                   |     |                   |     |                   |     |                    |     |
| Ecuador                               |                           |     |                   |     |                   |     |                   |     |                    |     |
| El Salvador                           |                           |     |                   |     |                   |     |                   |     |                    |     |
| Guatemala                             |                           |     |                   |     |                   |     |                   |     |                    |     |
| Guyana                                |                           |     |                   |     |                   |     |                   |     |                    |     |
| Honduras                              |                           |     |                   |     |                   |     |                   |     |                    |     |
| Mexico                                | 150500 (100500-209500)    | 1   | 4% (3-4.9)        | 1   | 95.3% (93.3-97.3) | 1   | 19.6% (13-26.3)   | 1   | 16.1               | 2   |
| Nicaragua                             |                           |     | 2.4% (0.1-12.9)   | 1   |                   |     |                   |     | 6                  | 2   |
| Panama                                |                           |     |                   |     |                   |     |                   |     |                    |     |
| Paraguay                              |                           |     | 9.4% (3.7-15)     | 1   | 9.8% (7.7-11.9)   | 1   |                   |     |                    |     |
| Peru                                  |                           |     | 13% (10.9-15.1)   | 1   |                   |     |                   |     |                    |     |
| Suriname                              |                           |     |                   |     |                   |     |                   |     |                    |     |
| Uruguay                               | 6500 (2000-19000)         | 1   | 18.5% (16.1-21)   | 1   | 21.9% (19-24.8)   | 1   |                   |     |                    |     |
| Venezuela                             |                           |     |                   |     |                   |     |                   |     |                    |     |
| <b>Middle East &amp; North Africa</b> | 349500 (177500-521500)    | 1   | 3.6% (1.5-6.2)    | 1   | 48.1% (39.2-57.1) | 1   | 9.4% (4.3-14.8)   | 1   | 10                 | 2   |
| Algeria                               | 40961 (26333-55590)       | 3   | 1.1% (0-5.7)      | 1   |                   |     |                   |     |                    |     |
| Bahrain                               | 674 (337-1011)            | 3   | 4.6% (1.9-9.3)    | 1   |                   |     |                   |     |                    |     |
| Cyprus                                | 500 (500-1000)            | 1   | 1.2% (0.6-1.7)    | 1   | 49.7% (44.4-55)   | 1   |                   |     | 8.8                | 2   |
| Egypt                                 | 88618 (56970-120265)      | 3   | 2.6% (0.6-4.5)    | 1   | 49.4% (35.8-63)   | 1   |                   |     |                    |     |
| Iraq                                  | 34673 (23115-46230)       | 3   |                   |     |                   |     |                   |     |                    |     |

| Country                                        | PWID Population size      | Ref | HIV Prevalence    | Ref | HCV AB Prevalence | Ref | % Unstably Housed | Ref | Injecting duration | Ref |
|------------------------------------------------|---------------------------|-----|-------------------|-----|-------------------|-----|-------------------|-----|--------------------|-----|
| Israel                                         |                           |     | 0% (0-0)          | 1   | 22.4% (15.3-33.3) | 1   | 8% (4.7-12.7)     | 1   | 14                 | 2   |
| Jordan                                         | 4850 (3200-6500)          | 3   |                   |     |                   |     |                   |     |                    |     |
| Kuwait                                         | 4100 (2700-5500)          | 3   |                   |     |                   |     |                   |     |                    |     |
| Lebanon                                        | 3300 (2200-4400)          | 3   | 0% (0-0)          | 1   | 23.4% (15.3-33.3) | 1   |                   |     |                    |     |
| Libyan Arab Jamahiriya                         | 2000 (1000-3000)          | 1   | 89.6% (85.8-92.7) | 1   | 94.5% (91.5-96.7) | 1   |                   |     |                    |     |
| Morocco                                        | 30500 (15500-45500)       | 1   | 9.6% (0-20.6)     | 1   | 53.9% (33.7-74)   | 1   | 11.1% (4.6-17.7)  | 1   | 10                 | 2   |
| Occ. Palestinian Territories                   | 1850 (1200-2500)          | 3   | 0% (0-0)          | 1   | 41.6% (35.2-47.9) | 1   |                   |     | 14                 | 2   |
| Oman                                           | 4250 (2800-5700)          | 3   | 11.8% (5-18.6)    | 1   |                   |     |                   |     |                    |     |
| Qatar                                          | 1190 (780-1600)           | 3   |                   |     |                   |     |                   |     |                    |     |
| Saudi Arabia                                   | 23600 (15172-32028)       | 3   | 9.8% (7-13.2)     | 1   | 77.8% (73.2-81.9) | 1   |                   |     |                    |     |
| South Sudan                                    |                           |     |                   |     |                   |     |                   |     |                    |     |
| Sudan                                          | 37828 (24319-51337)       | 3   | 0% (0-0)          | 1   |                   |     |                   |     |                    |     |
| Syrian Arab Rep.                               | 6000 (4000-8000)          | 3   | 0% (0-0)          | 1   | 3.3% (1.8-5.6)    | 1   |                   |     |                    |     |
| Tunisia                                        | 13163 (8462-17864)        | 3   | 3.5% (2.6-4.4)    | 1   | 29.1% (25.7-32.6) | 1   | 4.8% (3.3-6.6)    | 1   |                    |     |
| Turkey                                         |                           |     | 0.2% (0.1-0.4)    | 1   | 44.9% (41.7-48.2) | 1   |                   |     | 4                  | 2   |
| United Arab Emirates                           | 4800 (3200-6400)          | 3   |                   |     |                   |     |                   |     |                    |     |
| Yemen                                          | 19770 (12710-26830)       | 3   |                   |     |                   |     |                   |     |                    |     |
| <b>North America</b>                           | 2557000 (1498500-4428000) | 1   | 9% (7-11.1)       | 1   | 55.2% (40.8-67.7) | 1   | 50.3% (39.7-61)   | 1   | 16                 | 2   |
| Canada                                         | 308000 (262000-354500)    | 1   | 11.3% (8.5-14.3)  | 1   | 65.4% (60.1-70.6) | 1   | 41.9% (30.6-53.1) | 1   | 14.3               | 2   |
| United States                                  | 2248500 (1236500-4074000) | 1   | 8.7% (6.8-10.7)   | 1   | 53.1% (38.1-68)   | 1   | 51.5% (40.9-62.1) | 1   | 16.2               | 2   |
| <b>Pacific Island States &amp; Territories</b> | 22500 (15000-33500)       | 1   | 16.3% (10-22.7)   | 1   | 55.5% (43.8-67)   | 1   |                   |     |                    |     |
| American Samoa                                 |                           |     |                   |     |                   |     |                   |     |                    |     |
| Fed. States of Micronesia                      |                           |     |                   |     |                   |     |                   |     |                    |     |
| Fiji                                           |                           |     |                   |     |                   |     |                   |     |                    |     |
| French Polynesia                               |                           |     |                   |     |                   |     |                   |     |                    |     |
| Guam                                           |                           |     |                   |     |                   |     |                   |     |                    |     |
| Kiribati                                       |                           |     |                   |     |                   |     |                   |     |                    |     |
| Marshall Islands                               |                           |     |                   |     |                   |     |                   |     |                    |     |
| Nauru                                          |                           |     |                   |     |                   |     |                   |     |                    |     |
| New Caledonia                                  |                           |     |                   |     |                   |     |                   |     |                    |     |
| Northern Mariana Islands                       |                           |     |                   |     |                   |     |                   |     |                    |     |
| Palau                                          |                           |     |                   |     |                   |     |                   |     |                    |     |
| Papua New Guinea                               |                           |     |                   |     |                   |     |                   |     |                    |     |
| Samoa                                          |                           |     | 0% (0-0)          | 1   |                   |     |                   |     |                    |     |
| Solomon Islands                                |                           |     | 0% (0-0)          | 1   |                   |     |                   |     |                    |     |
| Tonga                                          |                           |     | 0% (0-0)          | 1   |                   |     |                   |     |                    |     |
| Tuvalu                                         |                           |     |                   |     |                   |     |                   |     |                    |     |
| Vanuatu                                        |                           |     |                   |     |                   |     |                   |     |                    |     |
| <b>South Asia</b>                              | 1023500 (783500-1263000)  | 1   | 19.4% (15-23.8)   | 1   | 38.6% (17.2-62.4) | 1   | 27.8% (19-36.7)   | 1   | 5.7                | 2   |
| Afghanistan                                    | 139000 (88000-190500)     | 1   | 4% (2.2-5.8)      | 1   | 37.8% (27.5-48.1) | 1   | 26.8% (22.5-31.4) | 4   | 2.5                | 2   |
| Bangladesh                                     | 68500 (63500-74000)       | 1   | 0.5% (0.2-0.7)    | 1   | 33.9% (22.4-45.4) | 1   | 14% (4.6-23.3)    | 1   | 6                  | 2   |
| Bhutan                                         |                           |     |                   |     |                   |     |                   |     |                    |     |
| India                                          | 197000 (127500-267000)    | 1   | 15.6% (12.9-18.2) | 1   | 40% (33.9-46.1)   | 1   | 43.6% (25.4-61.9) | 1   | 7.2                | 2   |
| Iran                                           | 158000 (107000-209000)    | 1   | 14% (9.2-18.7)    | 1   | 44.1% (28.2-59.9) | 1   | 32.8% (23.5-42.1) | 1   | 8.2                | 2   |

| Country                   | PWID Population size     | Ref          | HIV Prevalence    | Ref          | HCV AB Prevalence | Ref          | % Unstably Housed | Ref          | Injecting duration | Ref          |
|---------------------------|--------------------------|--------------|-------------------|--------------|-------------------|--------------|-------------------|--------------|--------------------|--------------|
| Maldives                  | 1500 (500-2500)          | <sup>1</sup> | 0% (0-0)          | <sup>1</sup> | 0.7% (0-1.7)      | <sup>1</sup> |                   |              | 3.5                | <sup>2</sup> |
| Nepal                     | 35000 (33500-37000)      | <sup>1</sup> | 9.6% (6.3-12.9)   | <sup>1</sup> | 44.5% (30.8-58.2) | <sup>1</sup> | 1.2% (0.4-2)      | <sup>1</sup> | 5.2                | <sup>2</sup> |
| Pakistan                  | 423000 (363000-482500)   | <sup>1</sup> | 32.3% (25.5-39.1) | <sup>1</sup> | 36.5% (0-79.1)    | <sup>1</sup> | 23.1% (18.3-28)   | <sup>1</sup> | 5.1                | <sup>2</sup> |
| Sri Lanka                 | 500 (500-500)            | <sup>1</sup> | 0% (0-0)          | <sup>1</sup> |                   | <sup>1</sup> | 2.1% (0.9-4.4)    | <sup>1</sup> | 11                 | <sup>2</sup> |
| <b>Sub Saharan Africa</b> | 1378000 (645500-3080000) | <sup>1</sup> | 18.3% (11.3-25.4) | <sup>1</sup> | 21.8% (17.6-26.5) | <sup>1</sup> | 26.5% (12-41)     | <sup>1</sup> | 4.6                | <sup>2</sup> |
| Angola                    |                          |              | 5.1% (3.2-7)      | <sup>1</sup> |                   |              |                   |              |                    |              |
| Benin                     |                          |              |                   |              |                   |              |                   |              | 13                 | <sup>2</sup> |
| Botswana                  |                          |              |                   |              |                   |              |                   |              |                    |              |
| Burkina Faso              |                          |              |                   |              |                   |              |                   |              |                    |              |
| Burundi                   |                          |              |                   |              |                   |              |                   |              |                    |              |
| Cameroon                  |                          |              |                   |              |                   |              |                   |              |                    |              |
| Cape Verde                |                          |              |                   |              |                   |              |                   |              |                    |              |
| Central African Republic  |                          |              |                   |              |                   |              |                   |              |                    |              |
| Chad                      |                          |              |                   |              |                   |              |                   |              |                    |              |
| Comoros                   |                          |              |                   |              |                   |              |                   |              |                    |              |
| Congo (Kinshasa)          | 3500 (0-158000)          | <sup>1</sup> | 13.3% (7.3-21.6)  | <sup>1</sup> |                   | <sup>1</sup> |                   |              |                    |              |
| Cote d'Ivoire             | 500 (500-1000)           | <sup>1</sup> | 5.3% (1.1-14.6)   | <sup>1</sup> | 1.8% (0-9.4)      | <sup>1</sup> | 10.5% (4.0-21.5)  | <sup>1</sup> |                    |              |
| Djibouti                  |                          |              |                   |              |                   |              |                   |              |                    |              |
| Equatorial Guinea         |                          |              |                   |              |                   |              |                   |              |                    |              |
| Eritrea                   |                          |              |                   |              |                   |              |                   |              |                    |              |
| Ethiopia                  |                          |              |                   |              |                   |              |                   |              |                    |              |
| Gabon                     |                          |              |                   |              |                   |              |                   |              |                    |              |
| Gambia                    |                          |              |                   |              |                   |              |                   |              |                    |              |
| Ghana                     |                          |              |                   |              | 40.1% (34.8-45.4) | <sup>1</sup> |                   |              | 10                 | <sup>2</sup> |
| Guinea                    |                          |              |                   |              |                   |              |                   |              |                    |              |
| Guinea-Bissau             |                          |              |                   |              |                   |              |                   |              |                    |              |
| Kenya                     | 30500 (9000-52000)       | <sup>1</sup> | 42% (21.1-62.8)   | <sup>1</sup> | 16.4% (10.9-23.3) | <sup>1</sup> | 25.2% (24.1-26.3) | <sup>4</sup> | 5.3                | <sup>2</sup> |
| Lesotho                   |                          |              |                   |              |                   |              |                   |              |                    |              |
| Liberia                   |                          |              |                   |              |                   |              |                   |              |                    |              |
| Madagascar                | 15500 (3000-79500)       | <sup>1</sup> | 4.8% (0.2-9.4)    | <sup>1</sup> | 5.5% (2.1-9)      | <sup>1</sup> |                   |              |                    |              |
| Malawi                    |                          |              |                   |              |                   |              |                   |              |                    |              |
| Mali                      |                          |              |                   |              |                   |              |                   |              |                    |              |
| Mauritania                |                          |              |                   |              |                   |              |                   |              |                    |              |
| Mauritius                 | 7000 (3500-14000)        | <sup>1</sup> | 45.5% (42.4-48.6) | <sup>1</sup> | 97.1% (96-98.1)   | <sup>1</sup> |                   |              | 14                 | <sup>2</sup> |
| Mozambique                | 29000 (0-59000)          | <sup>1</sup> | 46.3% (41.9-50.7) | <sup>1</sup> | 67.1% (62.9-71.2) | <sup>1</sup> |                   |              |                    |              |
| Namibia                   |                          |              |                   |              |                   |              |                   |              |                    |              |
| Niger                     |                          |              |                   |              |                   |              |                   |              |                    |              |
| Nigeria                   |                          |              | 3.1% (1.8-4.4)    | <sup>1</sup> | 5.8% (3.8-8.9)    | <sup>1</sup> |                   |              | 8                  | <sup>2</sup> |
| Rep. of the Congo         |                          |              |                   |              |                   |              |                   |              |                    |              |
| Rwanda                    | 2000 (500-4500)          | <sup>1</sup> |                   |              |                   |              |                   |              |                    |              |
| Sao Tome & Principe       |                          |              |                   |              |                   |              |                   |              |                    |              |
| Senegal                   |                          |              | 9.3% (5-15.4)     | <sup>1</sup> | 39.3% (31.1-47.9) | <sup>1</sup> |                   |              |                    |              |
| Seychelles                | 1500 (1000-2500)         | <sup>1</sup> | 3.8% (2-6.4)      | <sup>1</sup> | 42% (36.8-47.4)   | <sup>1</sup> |                   |              |                    |              |
| Sierra Leone              | 1500 (1000-1500)         | <sup>1</sup> | 8.5% (5.4-12.6)   | <sup>1</sup> |                   |              |                   |              |                    |              |
| Somalia                   | 1000 (500-2000)          | <sup>1</sup> |                   |              |                   |              |                   |              |                    |              |
| South Africa              | 76000 (21500-268000)     | <sup>1</sup> | 14.2% (11.1-17.8) | <sup>1</sup> |                   |              | 39.9% (21.1-58.7) | <sup>1</sup> |                    |              |
| Swaziland                 |                          |              |                   |              |                   |              |                   |              |                    |              |

| Country                   | PWID Population size     | Ref | HIV Prevalence    | Ref | HCV AB Prevalence | Ref | % Unstably Housed | Ref | Injecting duration | Ref |
|---------------------------|--------------------------|-----|-------------------|-----|-------------------|-----|-------------------|-----|--------------------|-----|
| Togo                      | 2500 (500-19500)         | 1   |                   |     |                   |     | 13% (9.2-17.6)    | 1   |                    |     |
| Uganda                    |                          |     |                   |     |                   |     |                   |     |                    |     |
| United Rep. of Tanzania   | 343000 (200000-486000)   | 1   | 28.3% (16.3-40.4) | 1   | 27.7% (22.4-33.5) | 1   | 23.7% (10-37.3)   | 1   | 4.3                | 2   |
| Zambia                    |                          |     |                   |     |                   |     |                   |     |                    |     |
| Zimbabwe                  |                          |     |                   |     |                   |     |                   |     |                    |     |
| <b>Western Europe</b>     | 1009500 (686500-1386500) | 1   | 4.5% (3.2-6)      | 1   | 53.2% (48.4-57.9) | 1   | 21.9% (15.9-27.9) | 1   | 10.7               | 2   |
| Albania                   |                          |     | 0.5% (0-2.8)      | 1   | 34% (27.5-41)     | 1   | 27.3% (19.6-36.1) | 1   |                    |     |
| Andorra                   |                          |     |                   |     |                   |     |                   |     |                    |     |
| Austria                   | 18500 (12500-24500)      | 1   | 0.6% (0.3-1)      | 1   | 60.9% (54.8-67)   | 1   | 14.7% (9.6-21.3)  | 1   | 13                 | 2   |
| Belgium                   | 26000 (18500-37000)      | 1   | 4.3% (3.3-5.4)    | 1   | 58.4% (47-69.7)   | 1   | 37.8% (15.4-40.2) | 1   | 13.3               | 2   |
| Croatia                   | 6500 (5000-8500)         | 1   | 0.4% (0-0.8)      | 1   | 36.7% (28.1-45.3) | 1   | 16.1% (8.6-23.7)  | 1   | 13.5               | 2   |
| Denmark                   | 16500 (13000-19000)      | 1   | 1.3% (0.3-3.6)    | 1   | 42.6% (36.1-49.1) | 1   | 26.8% (14.2-42.9) | 1   | 18.2               | 2   |
| England                   | 210500 (196500-225000)   | 1   | 0.8% (0.1-1.5)    | 1   | 30.7% (26.9-34.6) | 1   | 40.7% (26.4-55)   | 1   | 10                 | 2   |
| Finland                   | 17000 (15000-25000)      | 1   | 1.2% (0.5-2.4)    | 1   | 73.7% (69.9-77.2) | 1   |                   |     |                    |     |
| Form. Yug. Rep. Macedonia |                          |     |                   |     | 62.2% (59.4-64.9) | 1   |                   |     |                    |     |
| France                    | 82000 (66500-970000)     | 1   | 8.7% (5.3-12.1)   | 1   | 64% (60.8-67)     | 1   | 10.9% (7.2-15.8)  | 4   |                    |     |
| Germany                   | 131500 (14000-249500)    | 1   | 4.4% (2.3-6.4)    | 1   | 65% (60.6-69.4)   | 1   | 14.5% (10.7-18.2) | 1   | 13.9               | 2   |
| Greece                    | 5000 (4000-6000)         | 1   | 6.9% (4.2-9.6)    | 1   | 65.7% (61.8-69.5) | 1   | 34.5% (18.2-36)   | 1   | 11.7               | 2   |
| Greenland                 |                          |     |                   |     |                   |     |                   |     |                    |     |
| Iceland                   |                          |     |                   |     | 63% (59.8-66.2)   | 1   | 34.3% (33.1-44)   | 1   | 7                  | 2   |
| Ireland                   | 8500 (6500-10500)        | 1   | 5.8% (4.2-7.4)    | 1   | 74.6% (72.3-76.9) | 1   | 5.5% (3.4-7.6)    | 1   |                    |     |
| Italy                     | 341500 (233500-467500)   | 1   | 6.1% (4.7-7.5)    | 1   | 57.9% (52.5-63.3) | 1   | 14.7% (13.5-16)   | 1   | 9                  | 2   |
| Liechtenstein             |                          |     |                   |     |                   |     |                   |     |                    |     |
| Luxembourg                | 2000 (1500-2500)         | 1   | 1.5% (0.5-2.5)    | 1   | 81.3% (76.2-85.8) | 1   |                   |     |                    |     |
| Malta                     |                          |     | 0.5% (0-1.2)      | 1   | 25.2% (13.1-37.3) | 1   |                   |     |                    |     |
| Monaco                    |                          |     |                   |     |                   |     |                   |     |                    |     |
| Montenegro                |                          |     | 0.2% (0-0.6)      | 1   | 43.4% (39.8-47.1) | 1   |                   |     | 6                  | 2   |
| Netherlands               | 3500 (2500-4500)         | 1   | 2.3% (1.9-2.6)    | 1   | 55.3% (49.7-60.9) | 1   | 12.9% (10.5-15.6) | 4   |                    |     |
| Northern Ireland          |                          |     |                   |     |                   |     |                   |     |                    |     |
| Norway                    | 8500 (7000-10000)        | 1   | 0.7% (0-1.5)      | 1   | 64.8% (60.4-69.1) | 1   | 26.9% (16.9-36.9) | 1   | 14                 | 2   |
| Portugal                  | 16000 (14000-17500)      | 1   | 18% (15.4-20.6)   | 1   | 87.7% (80.5-95)   | 1   |                   |     |                    |     |
| San Marino                |                          |     |                   |     |                   |     |                   |     |                    |     |
| Scotland                  | 16000 (13500-17500)      | 1   | 0.8% (0.5-1.3)    | 1   | 52.2% (45.5-58.8) | 1   | 24.8% (20.3-29.3) | 1   | 11.5               | 2   |
| Serbia                    | 29000 (24000-34500)      | 1   | 0% (0-0)          | 1   | 25.9% (22.1-29.7) | 1   | 1.1% (0.2-2)      | 1   | 8.8                | 2   |
| Slovenia                  | 6000 (4000-75000)        | 1   | 0.5% (0.1-1)      | 1   | 30.5% (26.4-34.5) | 1   | 7.8% (4.5-12.4)   | 1   |                    |     |
| Spain                     | 10500 (3500-17500)       | 1   | 32.6% (31.6-33.6) | 1   | 71% (69.5-72.5)   | 1   | 24.9% (15.4-34.4) | 1   | 11.2               | 2   |
| Sweden                    | 8000 (2000-38500)        | 1   | 0.2% (0-0.5)      | 1   | 81.7% (79.6-83.6) | 1   | 34.9% (21.2-48.7) | 1   | 21                 | 2   |
| Switzerland               | 13500 (11000-16000)      | 1   | 1.4% (0.6-2.2)    | 1   | 74.6% (69.3-79.4) | 1   | 12.8% (11-14.7)   | 1   |                    |     |
| Wales                     |                          |     |                   |     | 26.8% (23.4-30.4) | 1   | 48.0% (43.6-52.5) | 4   | 9                  | 2   |



**Appendix Table 2: Country-level tPAFs of Unstable Housing on HIV and HCV.** *Estimates marked with an asterisk denotes that the country had ‘insufficient data’ and so regional data for were used.*

|                                 | HIV tPAF           | HCV tPAF           |
|---------------------------------|--------------------|--------------------|
| <b>Australasia</b>              |                    |                    |
| Australia                       | 9.0% (2.4-17.9)    | 11.1% (7.3-15.1)   |
| New Zealand                     | 6.8% (1.9-14.4)    | 7.3% (4.2-12.0)    |
| <b>Caribbean</b>                |                    |                    |
| Antigua & Barbuda               | 11.3% (3.2-21.4) * | 12.6% (9.0-16.6) * |
| Bahamas                         | 11.2% (3.1-21.2) * | 12.6% (8.9-16.9) * |
| Barbados                        | 11.3% (3.2-21.4) * | 12.6% (8.7-16.9) * |
| Bermuda                         | 11.0% (3.2-21.3) * | 12.7% (9.0-16.8) * |
| Comm. of Puerto Rico            | 11.9% (3.3-22.4)   | 10.7% (7.5-14.6)   |
| Cuba                            | 11.1% (3.1-21.1) * | 12.6% (8.9-17.0) * |
| Dominica                        | 11.2% (3.1-21.3) * | 12.6% (9.0-16.7) * |
| Dominican Republic              | 11.4% (3.1-20.8) * | 12.7% (9.0-16.7) * |
| Grenada                         | 11.3% (3.1-21.0) * | 12.5% (8.9-17.1) * |
| Haiti                           | 11.2% (3.0-20.7) * | 12.5% (8.8-16.8) * |
| Jamaica                         | 11.4% (3.1-20.8) * | 12.7% (9.0-17.0) * |
| Saint Kitts & Nevis             | 11.2% (3.1-20.8) * | 12.6% (8.9-17.1) * |
| Saint Lucia                     | 11.2% (3.3-21.6) * | 12.7% (8.9-16.9) * |
| St Vincent & the Grenadines     | 11.2% (3.3-21.2) * | 12.7% (9.0-17.0) * |
| Trinidad & Tobago               | 10.9% (3.1-21.0) * | 12.5% (8.8-16.7) * |
| <b>Central Asia</b>             |                    |                    |
| Kazakhstan                      | 9.8% (2.6-19.8)    | 9.4% (6.6-12.9)    |
| Kyrgyzstan                      | 11.4% (3.2-21.3)   | 13.8% (9.6-18.7)   |
| Tajikistan                      | 7.7% (2.1-15.7) *  | 9.4% (6.5-12.7) *  |
| Turkmenistan                    | 10.0% (2.6-19.8) * | 12.1% (8.1-17.3) * |
| Uzbekistan                      | 10.1% (2.6-20.0) * | 10.7% (7.5-14.8) * |
| <b>East and South East Asia</b> |                    |                    |
| Brunei Darussalam               | 5.6% (1.4-12.3) *  | 6.9% (4.4-10.5) *  |
| Cambodia                        | 9.1% (2.5-17.8)    | 12.6% (8.8-17.1) * |
| China                           | 5.9% (1.6-12.3)    | 7.4% (4.9-11.4)    |
| Hong Kong (China)               | 4.9% (1.2-10.0) *  | 4.3% (2.7-6.5) *   |
| Indonesia                       | 3.5% (0.9-7.4) *   | 3.5% (2.2-5.4) *   |
| Japan                           | 5.8% (1.5-11.7) *  | 5.7% (3.6-9.0) *   |
| Lao PDR                         | 5.4% (1.4-11.3) *  | 6.8% (4.4-10.5) *  |
| Malaysia                        | 5.0% (1.3-10.5) *  | 5.5% (3.4-8.1) *   |
| Mongolia                        | 5.8% (1.5-12.4) *  | 6.9% (4.4-10.6) *  |
| Myanmar                         | 6.0% (1.6-13.2) *  | 10.3% (6.7-16.1) * |
| North Korea                     | 5.6% (1.4-12.3) *  | 6.9% (4.3-10.4) *  |
| Philippines                     | 5.4% (1.5-11.6) *  | 8.1% (4.9-12.4) *  |
| Republic of Korea               | N/A                | 7.5% (4.6-11.5) *  |
| Singapore                       | 5.6% (1.5-11.9) *  | 7.4% (4.7-11.5) *  |
| Taiwan                          | 0.4% (0.1-1.1)     | 0.3% (0.2-0.6)     |
| Thailand                        | 5.0% (1.2-10.5) *  | 3.7% (2.3-5.9) *   |
| Timor Leste                     | 5.6% (1.4-12.4) *  | 6.8% (4.3-10.2) *  |
| Viet Nam                        | 6.5% (0.9-18.1)    | 7.4% (1.6-16.7)    |
| <b>Eastern Europe</b>           |                    |                    |

|                                       |                    |                     |
|---------------------------------------|--------------------|---------------------|
| Armenia                               | 4.4% (1.1-9.3) *   | 5.3% (3.5-8.0) *    |
| Azerbaijan                            | 4.2% (1.1-9.1) *   | 4.3% (2.8-6.6) *    |
| Belarus                               | 3.4% (0.9-7.1) *   | 4.5% (2.8-6.8) *    |
| Bosnia & Herzegovina                  | 4.1% (1.0-8.9) *   | 5.1% (3.3-7.7) *    |
| Bulgaria                              | 2.1% (0.5-4.6)     | 1.9% (1.3-2.7)      |
| Czech Republic                        | 25.8% (8.0-42.1)   | 32.0% (24.1-41.1)   |
| Estonia                               | 2.1% (0.6-4.5) *   | 3.4% (2.1-5.3) *    |
| Georgia                               | 1.9% (0.5-5.1)     | 2.0% (0.9-3.6)      |
| Hungary                               | 12.0% (3.1-25.3)   | 13.7% (6.7-21.4)    |
| Latvia                                | 0.7% (0.2-2.0)     | 0.8% (0.3-1.5)      |
| Lithuania                             | 3.8% (1.0-8.5)     | 4.9% (3.1-7.4)      |
| Moldova                               | 3.4% (0.9-7.8)     | 5.2% (3.2-7.8)      |
| Poland                                | 9.4% (2.6-17.7)    | 11.3% (8.2-15.0)    |
| Romania                               | 8.0% (1.4-20.5)    | 7.5% (2.3-13.6)     |
| Russian Federation                    | 2.2% (0.5-5.0)     | 2.7% (1.4-4.2)      |
| Slovakia                              | 4.7% (1.1-10.4) *  | 4.7% (2.9-7.1) *    |
| Ukraine                               | 0.3% (0.1-0.6)     | 0.3% (0.2-0.6)      |
| <b>Latin America</b>                  |                    |                     |
| Argentina                             | 6.4% (1.9-13.4) *  | 12.1% (7.8-16.9) *  |
| Belize                                | 7.8% (2.0-16.1) *  | 11.6% (7.6-16.3) *  |
| Bolivia                               | 7.6% (2.1-16.0) *  | 11.4% (7.7-16.3) *  |
| Brazil                                | 6.5% (1.6-14.6) *  | 11.4% (7.6-16.0) *  |
| Chile                                 | 7.5% (2.1-15.5) *  | 11.5% (7.6-16.3) *  |
| Colombia                              | 16.8% (4.9-33.5) * | 20.9% (13.3-30.9) * |
| Costa Rica                            | 7.9% (2.0-15.8) *  | 11.6% (7.5-16.0) *  |
| Ecuador                               | 7.7% (2.0-16.1) *  | 11.5% (7.5-15.8) *  |
| El Salvador                           | 7.8% (2.0-15.7) *  | 11.5% (7.6-16.5) *  |
| Guatemala                             | 7.8% (2.0-16.2) *  | 11.5% (7.6-16.2) *  |
| Guyana                                | 7.7% (2.2-16.1) *  | 11.4% (7.4-16.1) *  |
| Honduras                              | 7.8% (2.2-15.4) *  | 11.4% (7.8-16.1) *  |
| Mexico                                | 10.2% (2.7-19.8)   | 7.8% (5.0-11.5)     |
| Nicaragua                             | 12.7% (3.4-25.2) * | 12.0% (8.1-17.4) *  |
| Panama                                | 7.7% (2.0-15.7) *  | 11.4% (7.6-16.1) *  |
| Paraguay                              | 9.8% (2.7-18.6) *  | 14.0% (9.3-19.8) *  |
| Peru                                  | 9.5% (2.6-18.4) *  | 11.5% (7.6-16.0) *  |
| Suriname                              | 7.7% (2.2-15.6) *  | 11.5% (7.7-16.0) *  |
| Uruguay                               | 9.2% (2.5-17.8) *  | 13.6% (9.0-19.8) *  |
| Venezuela                             | 7.8% (2.2-15.9) *  | 11.5% (7.6-16.4) *  |
| <b>Middle East &amp; North Africa</b> |                    |                     |
| Algeria                               | 6.0% (1.5-13.3) *  | 7.0% (3.8-11.1) *   |
| Bahrain                               | 5.9% (1.6-13.5) *  | 6.9% (3.7-10.9) *   |
| Cyprus                                | 6.2% (1.7-14.5) *  | 7.0% (3.8-11.1) *   |
| Egypt                                 | 6.0% (1.5-14.0) *  | 6.9% (3.8-11.1) *   |
| Iraq                                  | 6.0% (1.5-13.8) *  | 7.1% (4.0-11.2) *   |
| Israel                                | NA                 | 6.1% (3.7-9.5)      |
| Jordan                                | 6.0% (1.5-13.5) *  | 7.0% (3.7-10.9) *   |
| Kuwait                                | 6.0% (1.6-13.5) *  | 6.9% (3.8-11.0) *   |
| Lebanon                               | NA                 | 8.3% (4.8-13.1) *   |
| Libyan Arab Jamahiriya                | 0.4% (0.1-1.0) *   | 3.4% (1.7-5.7) *    |

|                              |                    |                     |
|------------------------------|--------------------|---------------------|
| Morocco                      | 6.3% (1.7-14.4)    | 7.7% (3.7-12.5)     |
| Occ. Palestinian Territories | NA                 | 7.0% (3.8-11.0) *   |
| Oman                         | 5.4% (1.4-12.2) *  | 6.8% (3.8-11.1) *   |
| Qatar                        | 6.0% (1.4-14.1) *  | 6.9% (3.6-11.0) *   |
| Saudi Arabia                 | 5.8% (1.5-12.9) *  | 4.9% (2.8-7.8) *    |
| South Sudan                  | 6.1% (1.5-14.1) *  | 6.9% (3.8-11.2) *   |
| Sudan                        | NA                 | 6.8% (3.7-11.1) *   |
| Syrian Arab Rep.             | NA                 | 9.0% (5.0-14.5) *   |
| Tunisia                      | 3.4% (0.9-7.3)     | 4.4% (2.7-6.5)      |
| Turkey                       | 8.2% (2.0-18.9) *  | 8.3% (4.5-13.4) *   |
| United Arab Emirates         | 5.9% (1.5-14.0) *  | 7.0% (3.8-10.9) *   |
| Yemen                        | 6.0% (1.5-14.1) *  | 6.9% (3.6-11.2) *   |
| <b>North America</b>         |                    |                     |
| Canada                       | 18.7% (5.7-33.0)   | 21.6% (15.4-28.8)   |
| United States                | 22.0% (6.9-37.2)   | 27.0% (20.1-34.3)   |
| <b>South Asia</b>            |                    |                     |
| Afghanistan                  | 24.7% (7.2-45.0)   | 26.0% (17.9-36.3)   |
| Bangladesh                   | 10.2% (2.4-23.4)   | 12.4% (5.7-20.6)    |
| Bhutan                       | 15.6% (4.5-29.1) * | 21.3% (13.8-30.3) * |
| India                        | 22.4% (6.6-39.8)   | 28.2% (18.5-38.8)   |
| Iran                         | 17.7% (5.1-32.8)   | 21.8% (15.3-29.7)   |
| Maldives                     | NA                 | 32.6% (22.3-46.1) * |
| Nepal                        | 0.9% (0.2-2.3)     | 1.1% (0.5-2.0)      |
| Pakistan                     | 11.5% (3.2-22.5)   | 18.8% (11.5-28.3)   |
| Sri Lanka                    | NA                 | 2.0% (1.0-3.7) *    |
| <b>Sub Saharan Africa</b>    |                    |                     |
| Angola                       | 17.4% (4.6-34.7) * | 24.3% (13.8-36.1) * |
| Benin                        | 12.6% (3.5-24.5) * | 19.3% (10.9-28.4) * |
| Botswana                     | 13.1% (3.4-26.1) * | 24.5% (14.6-35.1) * |
| Burkina Faso                 | 15.1% (4.2-32.0) * | 24.7% (14.3-36.2) * |
| Burundi                      | 15.1% (4.0-30.8) * | 24.6% (13.9-36.8) * |
| Cameroon                     | 15.3% (4.2-31.1) * | 24.1% (14.4-37.3) * |
| Cape Verde                   | 15.2% (4.3-31.5) * | 24.3% (13.9-37.0) * |
| Central African Republic     | 15.0% (4.2-30.7) * | 24.3% (14.2-37.1) * |
| Chad                         | 15.4% (4.2-30.9) * | 24.4% (14.3-37.0) * |
| Comoros                      | 15.6% (4.0-30.6) * | 24.4% (14.3-37.1) * |
| Congo (Kinshasa)             | 16.7% (5.1-34.6) * | 24.7% (14.4-35.9) * |
| Cote d'Ivoire                | 8.1% (1.9-19.5)    | 14.4% (6.8-25.5)    |
| Djibouti                     | 15.2% (4.5-31.2) * | 24.4% (14.5-36.3) * |
| Equatorial Guinea            | 14.8% (4.2-30.2) * | 24.6% (14.5-37.0) * |
| Eritrea                      | 15.4% (4.3-32.8) * | 24.4% (14.3-37.0) * |
| Ethiopia                     | 15.2% (4.2-31.3) * | 24.2% (14.0-37.0) * |
| Gabon                        | 15.5% (4.1-31.1) * | 24.5% (14.0-36.2) * |
| Gambia                       | 15.7% (4.5-32.3) * | 24.5% (14.2-36.3) * |
| Ghana                        | 13.1% (3.5-26.5) * | 18.3% (10.5-27.7) * |
| Guinea                       | 15.8% (4.5-31.2) * | 24.3% (14.5-36.3) * |
| Guinea-Bissau                | 15.4% (4.2-31.1) * | 24.5% (14.4-36.1) * |
| Kenya                        | 9.8% (2.5-20.6)    | 23.4% (17.1-31.8)   |
| Lesotho                      | 13.2% (3.6-26.4) * | 24.2% (13.6-36.9) * |

|                           |                    |                     |
|---------------------------|--------------------|---------------------|
| Liberia                   | 15.4% (4.4-32.1) * | 24.4% (14.5-35.5) * |
| Madagascar                | 18.4% (5.4-36.8) * | 26.7% (15.5-40.2) * |
| Malawi                    | 14.3% (3.8-29.6) * | 24.3% (14.1-37.4) * |
| Mali                      | 15.8% (4.3-31.4) * | 24.8% (14.7-36.1) * |
| Mauritania                | 15.5% (4.1-31.4) * | 24.2% (14.5-36.3) * |
| Mauritius                 | 9.2% (2.4-19.8) *  | 9.4% (4.8-14.7) *   |
| Mozambique                | 9.4% (2.5-20.2) *  | 15.0% (8.6-23.3) *  |
| Namibia                   | 13.9% (3.9-29.4) * | 24.4% (14.8-36.9) * |
| Niger                     | 15.9% (3.9-31.4) * | 24.5% (14.2-36.6) * |
| Nigeria                   | 14.6% (3.9-30.1) * | 22.5% (13.3-33.6) * |
| Rep. of the Congo         | 15.6% (4.2-31.6) * | 24.3% (14.1-36.6) * |
| Rwanda                    | 14.9% (4.1-30.9) * | 24.3% (13.7-36.0) * |
| Sao Tome & Principe       | 15.7% (4.2-31.7) * | 24.6% (14.5-37.2) * |
| Senegal                   | 16.8% (4.4-34.6) * | 21.1% (11.5-31.8) * |
| Seychelles                | 17.9% (4.8-37.2) * | 20.8% (12.1-31.9) * |
| Sierra Leone              | 17.3% (4.6-33.5) * | 24.8% (14.3-35.9) * |
| Somalia                   | 16.1% (4.1-31.1) * | 24.5% (14.0-36.5) * |
| South Africa              | 20.3% (5.8-36.8)   | 33.1% (21.7-46.1) * |
| Swaziland                 | 13.4% (3.7-26.5) * | 24.5% (13.9-37.4) * |
| Togo                      | 8.4% (2.2-17.1) *  | 14.1% (9.0-20.7) *  |
| Uganda                    | 14.8% (3.9-30.6) * | 24.4% (14.5-36.2) * |
| United Rep. of Tanzania   | 12.2% (3.0-26.5)   | 21.8% (12.1-34.0)   |
| Zambia                    | 13.9% (3.7-28.7) * | 24.6% (14.4-36.3) * |
| Zimbabwe                  | 13.9% (3.6-27.9) * | 24.7% (14.5-35.5) * |
| <b>Western Europe</b>     |                    |                     |
| Albania                   | 15.4% (4.3-28.0)   | 18.9% (13.0-25.3)   |
| Andorra                   | 11.8% (3.3-22.7) * | 13.9% (9.4-19.1) *  |
| Austria                   | 8.4% (2.2-16.9)    | 9.4% (5.8-13.7)     |
| Belgium                   | 15.0% (4.1-29.1)   | 17.7% (10.7-24.8)   |
| Croatia                   | 8.6% (2.2-18.4)    | 11.3% (6.7-16.8)    |
| Denmark                   | 13.3% (3.8-26.6)   | 17.0% (10.4-25.1)   |
| England                   | 20.4% (6.1-35.9)   | 26.0% (18.2-34.6)   |
| Finland                   | 12.0% (3.4-22.8) * | 11.4% (7.9-15.9) *  |
| Form. Yug. Rep. Macedonia | 11.7% (3.4-22.7) * | 12.9% (8.9-17.9) *  |
| France                    | 6.2% (1.6-12.9)    | 6.8% (4.4-10.3)     |
| Germany                   | 7.8% (2.1-15.7)    | 8.7% (6.0-12.2)     |
| Greece                    | 14.8% (4.4-27.7)   | 16.4% (10.5-22.1)   |
| Greenland                 | 11.7% (3.2-22.9) * | 13.9% (9.7-19.1) *  |
| Iceland                   | 20.8% (6.3-36.6) * | 20.8% (15.2-27.1)   |
| Ireland                   | 3.2% (0.8-7.0)     | 3.0% (1.9-4.6)      |
| Italy                     | 8.6% (2.4-17.1)    | 9.6% (6.9-12.7)     |
| Liechtenstein             | 11.8% (3.4-22.9) * | 14.0% (9.7-19.2) *  |
| Luxembourg                | 12.1% (3.5-23.1) * | 10.3% (7.2-14.7) *  |
| Malta                     | 12.2% (3.3-23.5) * | 16.3% (11.2-22.5) * |
| Monaco                    | 11.8% (3.3-23.4) * | 14.0% (9.6-19.3) *  |
| Montenegro                | 14.7% (4.0-28.3) * | 16.3% (11.1-22.6) * |
| Netherlands               | 7.5% (2.1-14.7)    | 8.7% (6.0-11.6)     |
| Northern Ireland          | 12.0% (3.2-22.6) * | 13.9% (9.6-19.2) *  |
| Norway                    | 13.4% (3.9-26.5)   | 15.0% (9.7-20.8)    |

|             |                    |                    |
|-------------|--------------------|--------------------|
| Portugal    | 10.7% (3.0-20.8) * | 9.2% (6.1-13.2) *  |
| San Marino  | 11.8% (3.3-22.9) * | 13.8% (9.4-19.4) * |
| Scotland    | 13.3% (3.5-24.7)   | 15.6% (11.2-20.4)  |
| Serbia      | NA                 | 1.0% (0.4-1.8)     |
| Slovenia    | 5.0% (1.2-11.2)    | 6.5% (3.8-10.6)    |
| Spain       | 10.3% (3.0-20.7)   | 13.3% (8.6-19.1)   |
| Sweden      | 15.9% (4.6-29.7)   | 16.3% (10.6-23.5)  |
| Switzerland | 7.5% (2.0-15.0)    | 7.0% (5.0-9.3)     |
| Wales       | 23.7% (7.2-39.7) * | 30.6% (22.9-38.6)  |

Appendix Figure 1: Scatter plot of the tPAFs of HIV and HCV for countries where sufficient data was available for both estimates. Dashed line is  $y=x$ .

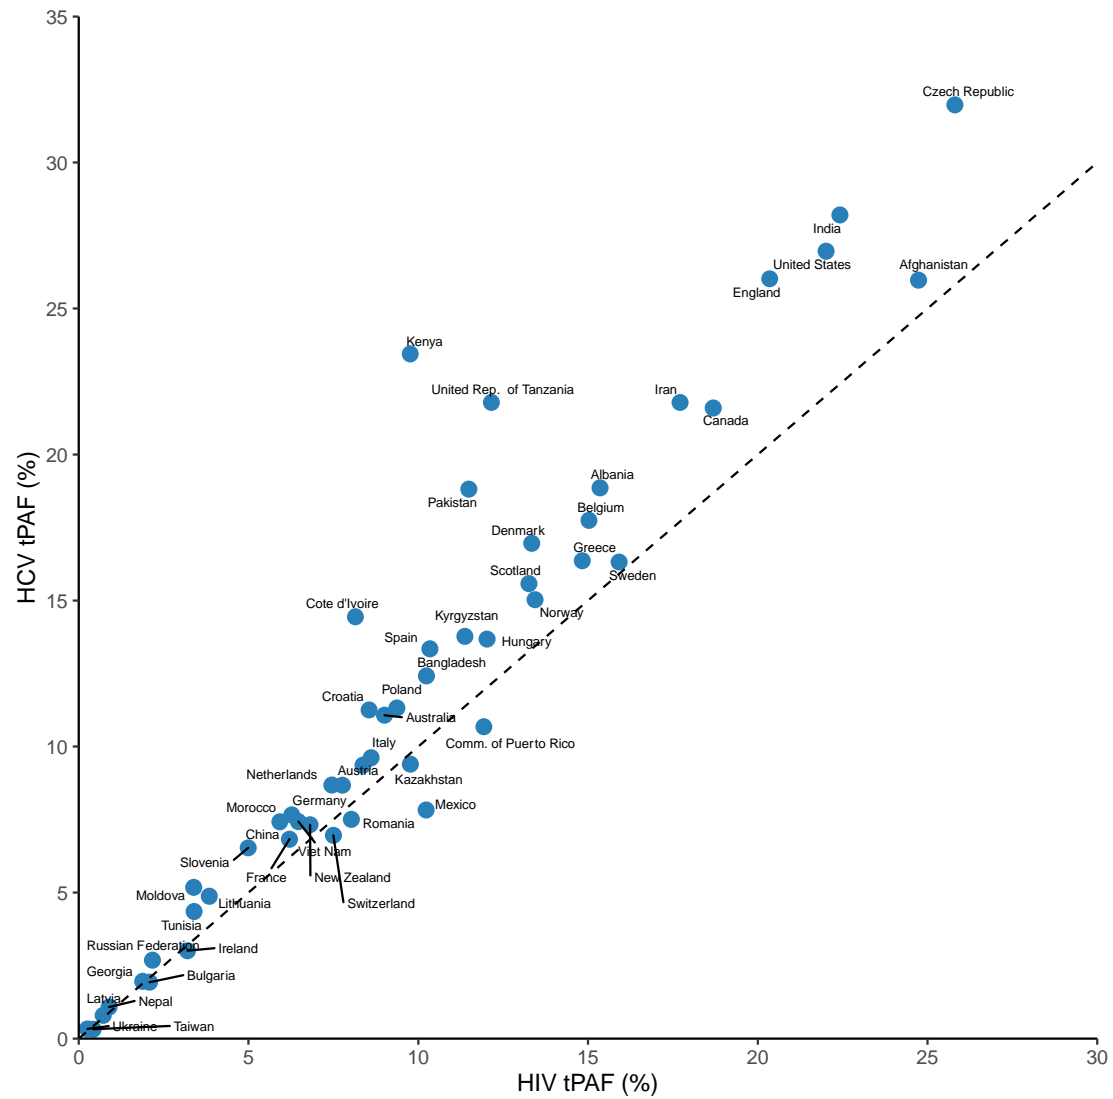

**Appendix Figure 2: Scatter plot of the ratio between the median tPAF and cPAF and the HIV/HCV prevalence for countries where sufficient data was available. Black lines are the line of best fit.**

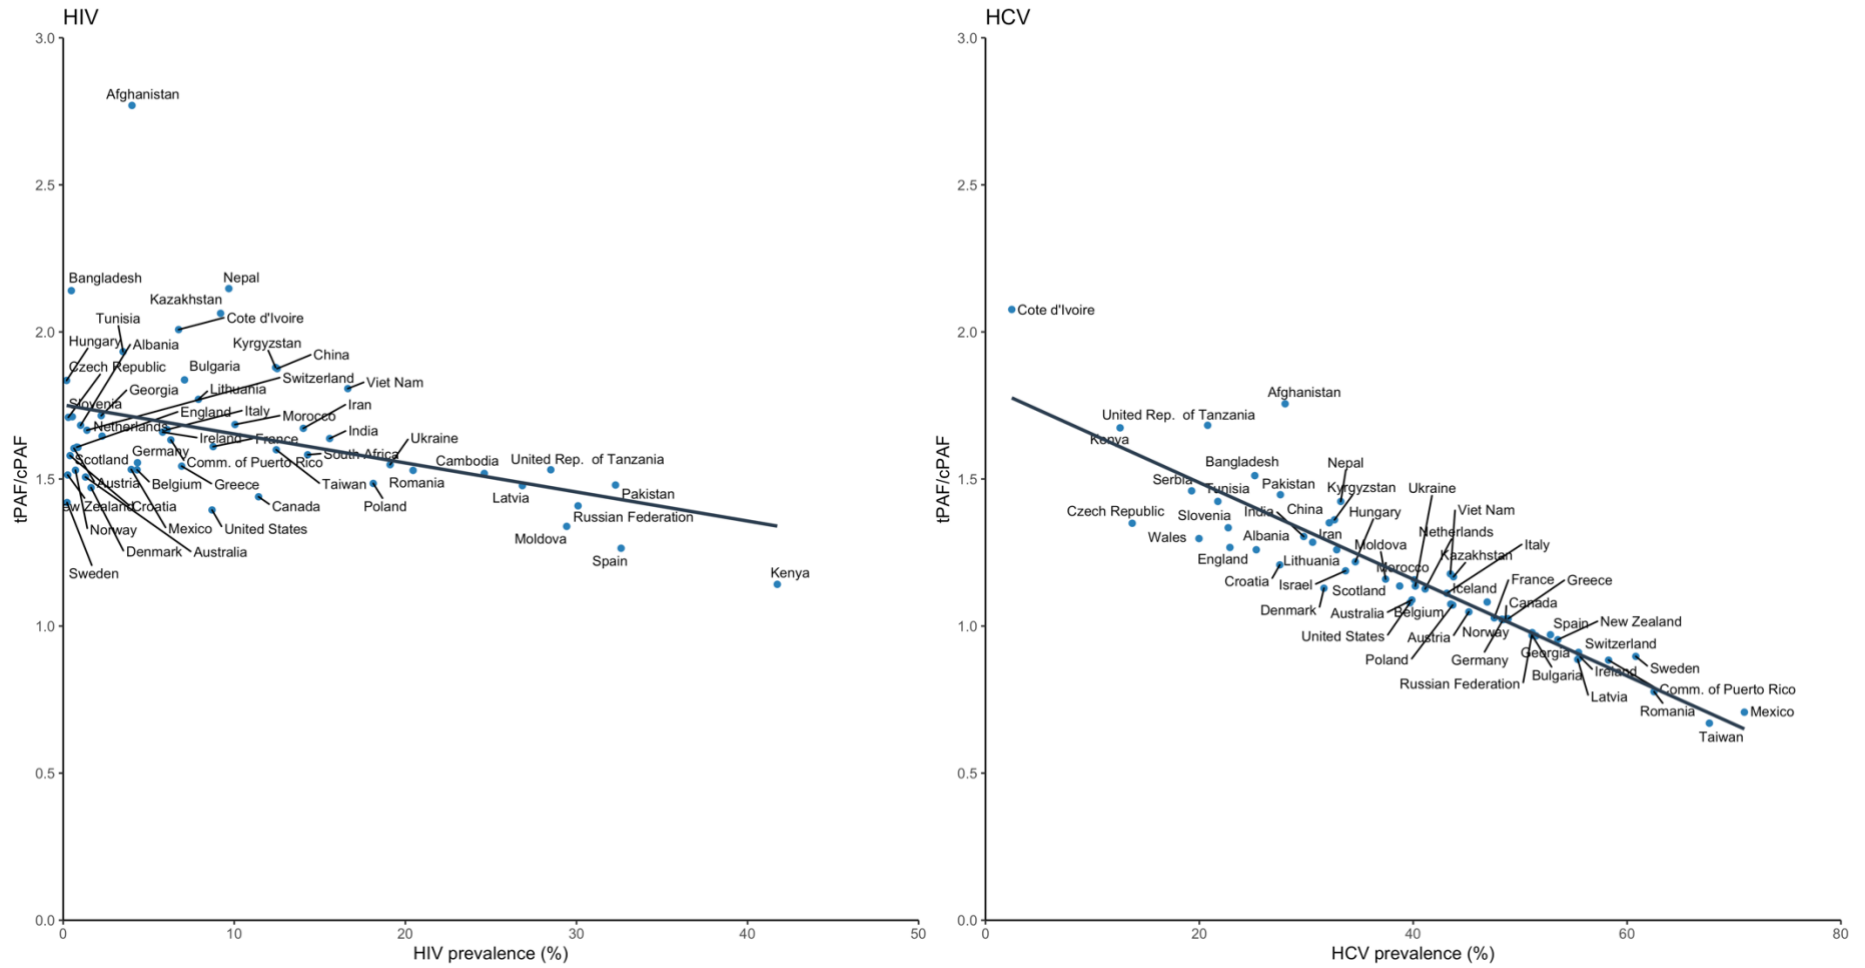

**Appendix Figure 3: Results of the uncertainty analyses for the PAF of Unstable Housing on HIV transmission.** Stacked bars show how uncertainty in each parameter contributed to the variability in the estimates of the PAF for each country for which the PAF could be estimated without using imputed data.

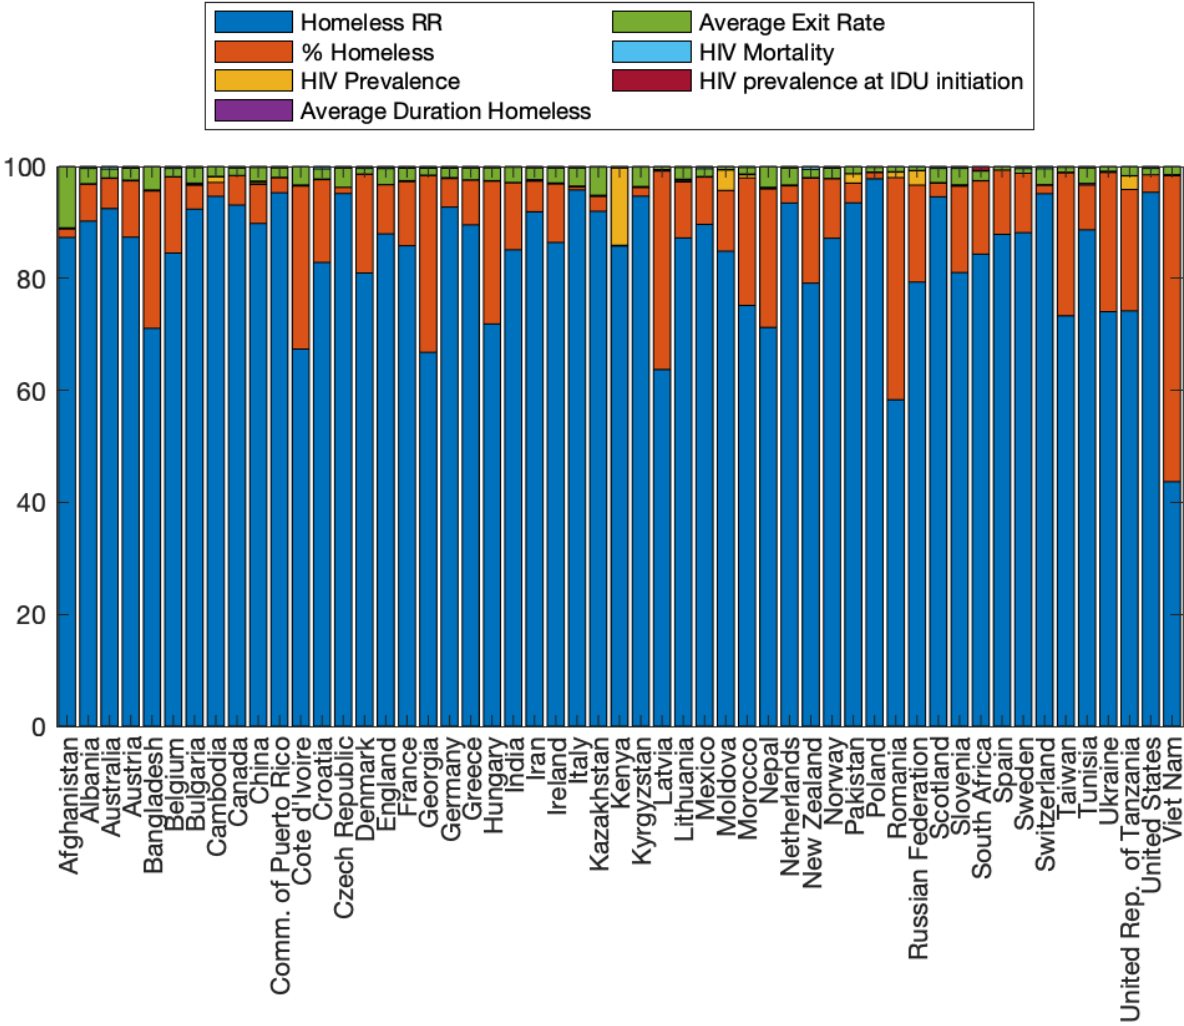



**Appendix Figure 4: Results of the uncertainty analyses for the PAF of Unstable Housing on HCV transmission.** Stacked bars show how uncertainty in each parameter contributed to the variability in the estimates of the PAF for each country for which the PAF could be estimated without using imputed data.

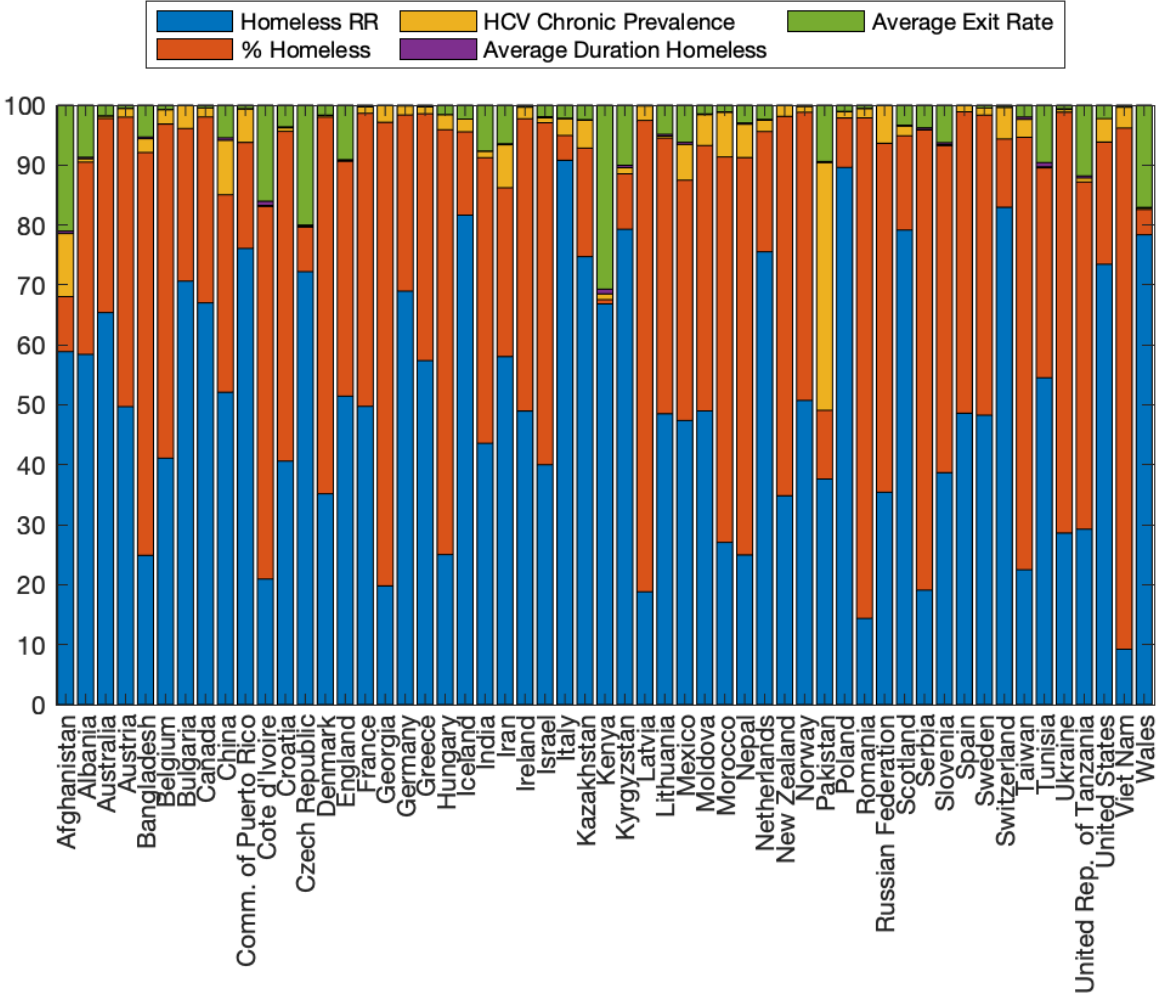

**Appendix Table 3: Sensitivity analysis for the Regional & Global tPAFs of Unstable Housing on HIV.** *Estimates are the weighted average over all countries within a region with a PWID population size.*

|                                     | <b>Main Analyses</b> | <b>Assortative Mixing</b> | <b>Unadjusted RR</b> | <b>Decreasing incidence</b> | <b>Increasing incidence</b> | <b>All PWID start injecting stably housed</b> | <b>Unstably housed PWID have higher mortality rates</b> |
|-------------------------------------|----------------------|---------------------------|----------------------|-----------------------------|-----------------------------|-----------------------------------------------|---------------------------------------------------------|
| Australasia                         | 8.8% (2.4-17.7)      | 24.3% (7.7-38.9)          | 12.6% (6.3-20.5)     | 8.6% (2.1-17.1)             | 9.3% (2.5-18.3)             | 9.3% (2.6-18.3)                               | 8.8% (2.4-17.7)                                         |
| Caribbean                           | 11.9% (3.3-22.4)     | 20.1% (6.0-33.4)          | 16.5% (8.6-25.7)     | 11.4% (3.1-21.7)            | 12.3% (3.3-23.3)            | 12.5% (3.4-24.1)                              | 12.1% (3.2-22.6)                                        |
| Central Asia                        | 10.3% (2.8-19.8)     | 16.3% (4.8-28.2)          | 14.4% (7.4-23.4)     | 10.0% (2.6-18.8)            | 10.5% (2.8-20.7)            | 11.3% (3.0-22.1)                              | 10.3% (2.8-19.8)                                        |
| East and South East Asia            | 6.0% (1.7-12.5)      | 10.1% (2.9-19.6)          | 8.6% (4.5-14.8)      | 5.9% (1.4-12.3)             | 6.1% (1.6-12.7)             | 6.7% (1.8-13.7)                               | 6.0% (1.7-12.4)                                         |
| Eastern Europe                      | 2.2% (0.5-4.8)       | 2.6% (0.7-6.0)            | 3.2% (1.5-5.9)       | 2.3% (0.5-5.2)              | 2.1% (0.3-4.7)              | 2.3% (0.6-5.1)                                | 2.2% (0.6-4.8)                                          |
| Latin America                       | 10.2% (2.7-19.8)     | 21.3% (6.7-34.6)          | 14.3% (7.0-23.1)     | 9.9% (2.5-19.3)             | 10.7% (3.0-20.6)            | 10.7% (2.8-20.6)                              | 10.3% (2.7-19.9)                                        |
| Middle East & North Africa          | 5.8% (1.6-13.1)      | 12.2% (3.5-25.7)          | 8.4% (3.8-15.8)      | 5.7% (1.5-12.9)             | 6.0% (1.4-13.7)             | 6.3% (1.6-14.1)                               | 5.8% (1.5-13.1)                                         |
| North America                       | 21.6% (6.7-36.3)     | 23.4% (7.8-37.6)          | 28.7% (16.4-40.6)    | 20.8% (6.5-35.4)            | 22.2% (7.2-37.3)            | 22.4% (7.1-37.2)                              | 22.1% (6.9-37.3)                                        |
| Pacific Island States & Territories | -                    | -                         | -                    | -                           | -                           | -                                             | -                                                       |
| South Asia                          | 14.1% (4.3-25.6)     | 13.8% (4.2-24.3)          | 19.4% (10.5-29.5)    | 14.1% (4.0-25.8)            | 13.9% (4.1-25.7)            | 15.1% (4.5-27.5)                              | 14.3% (4.3-25.8)                                        |
| Sub Saharan Africa                  | 13.0% (3.3-26.1)     | 12.8% (3.4-25.0)          | 17.9% (8.5-30.4)     | 13.2% (3.4-26.6)            | 12.7% (3.3-26.1)            | 13.8% (3.5-28.1)                              | 13.0% (3.3-26.6)                                        |
| Western Europe                      | 8.2% (2.1-15.9)      | 15.7% (4.5-27.5)          | 11.5% (5.9-18.4)     | 8.0% (2.0-15.6)             | 8.5% (2.2-16.4)             | 8.7% (2.3-17.0)                               | 8.2% (2.2 – 16.0)                                       |
| <b>Global</b>                       | 7.9% (2.3-15.7)      | 9.3% (2.7-17.2)           | 11.0% (5.8-18.0)     | 7.9% (2.2-15.5)             | 8.0% (2.2-15.7)             | 8.5% (2.4-16.7)                               | 8.1% (2.3 – 16.0)                                       |
| <b>High-income</b>                  | 17.2% (5.1-30.0)     | 20.5% (6.3-33.9)          | 23.0% (13.0-34.4)    | 16.6% (4.9-29.4)            | 17.6% (5.5-30.8)            | 17.6% (5.3-31.6)                              | 17.8% (5.4-31.3)                                        |
| <b>Low/middle income</b>            | 6.6% (1.8-13.1)      | 7.7% (2.2-14.9)           | 9.2% (4.7-15.4)      | 6.6% (1.8-13.2)             | 6.5% (1.8-13.1)             | 7.1% (2.0-14.2)                               | 6.7% (1.9-13.3)                                         |

**Appendix Table 4: Sensitivity analysis for the Regional & Global tPAFs of Unstable Housing on HCV.** *Estimates are the weighted average over all countries within a region with a PWID population size.*

|                                     | <b>Main Analyses</b> | <b>Assortative Mixing</b> | <b>Higher RR in Europe</b> | <b>Decreasing incidence</b> | <b>Increasing incidence</b> | <b>All PWID start injecting stably housed</b> | <b>Treat 10% infected PWID per year</b> | <b>Unstably housed PWID have higher mortality rates</b> |
|-------------------------------------|----------------------|---------------------------|----------------------------|-----------------------------|-----------------------------|-----------------------------------------------|-----------------------------------------|---------------------------------------------------------|
| Australasia                         | 10.1% (6.9-13.9)     | 10.2% (7.0-14.0)          | 10.1% (6.9-13.9)           | 10.2% (7.0-14.0)            | 10.0% (6.8-13.6)            | 10.2% (7.0-14.0)                              | 10.8% (7.4-14.8)                        | 10.1% (6.9-13.9)                                        |
| Caribbean                           | 10.7% (7.5-14.6)     | 9.6% (6.7-13.2)           | 10.7% (7.5-14.6)           | 11.2% (7.9-15.1)            | 10.1% (7.2-14.0)            | 10.4% (7.3-14.3)                              | 12.7% (8.7-17.0)                        | 10.7% (7.5-14.6)                                        |
| Central Asia                        | 10.1% (6.9-13.6)     | 9.5% (6.6-12.8)           | 10.1% (6.9-13.6)           | 10.6% (7.3-14.3)            | 9.5% (6.5-12.8)             | 10.4% (7.2-14.0)                              | 10.9% (7.5-14.7)                        | 10.1% (6.9-13.6)                                        |
| East and South East Asia            | 7.4% (4.9-11.2)      | 8.0% (5.3-12.4)           | 7.4% (4.9-11.2)            | 7.6% (5.1-11.3)             | 7.2% (4.6-11.1)             | 7.8% (5.1-12.0)                               | 7.9% (5.2-11.7)                         | 7.4% (4.9-11.2)                                         |
| Eastern Europe                      | 2.8% (1.6-4.2)       | 2.5% (1.5-3.9)            | 4.3% (2.5-7.1)             | 3.0% (1.7-4.6)              | 2.6% (1.5-4.0)              | 2.8% (1.6-4.2)                                | 3.2% (1.7-5.1)                          | 2.8% (1.7-4.3)                                          |
| Latin America                       | 7.8% (5.0-11.5)      | 6.8% (4.3-10.1)           | 7.8% (5.0-11.5)            | 8.3% (5.4-12.0)             | 7.3% (4.6-10.9)             | 7.3% (4.5-11.0)                               | 10.3% (6.3-14.6)                        | 7.8% (4.9-11.4)                                         |
| Middle East & North Africa          | 6.9% (3.7-11.1)      | 7.4% (4.0-12.1)           | 6.9% (3.7-11.1)            | 7.1% (3.7-11.5)             | 6.8% (3.6-11.1)             | 7.2% (3.8-11.8)                               | 7.6% (3.9-12.0)                         | 6.9% (3.7-11.3)                                         |
| North America                       | 26.2% (19.5-33.2)    | 25.1% (18.8-31.5)         | 26.2% (19.5-33.2)          | 26.3% (19.5-33.3)           | 26.0% (19.5-33.1)           | 26.4% (19.7-33.5)                             | 27.6% (20.7-34.8)                       | 26.5% (19.8-33.6)                                       |
| Pacific Island States & Territories | -                    | -                         | -                          | -                           | -                           | -                                             | -                                       | -                                                       |
| South Asia                          | 21.4% (15.0-29.2)    | 20.6% (14.2-27.7)         | 21.4% (15.0-29.2)          | 21.7% (15.3-29.5)           | 20.9% (14.5-28.6)           | 22.8% (15.7-31.1)                             | 22.2% (15.7-29.9)                       | 21.7% (15.1-29.4)                                       |
| Sub Saharan Africa                  | 21.9% (12.5-33.8)    | 23.4% (15.0-32.6)         | 21.9% (12.5-33.8)          | 21.5% (12.4-33.2)           | 21.8% (12.5-33.6)           | 23.6% (13.5-36.3)                             | 22.3% (12.8-34.2)                       | 22.0% (12.5-34.1)                                       |
| Western Europe                      | 10.6% (7.3-14.4)     | 10.5% (7.3-14.2)          | 15.9% (11.0-22.0)          | 10.8% (7.5-14.6)            | 10.5% (7.2-14.2)            | 10.8% (7.4-14.6)                              | 11.3% (7.8-15.2)                        | 10.7% (7.4-14.4)                                        |
| <b>Global</b>                       | 11.2% (7.7-15.5)     | 11.1% (7.6-15.1)          | 12.3% (9.1-16.1)           | 11.3% (7.9-15.5)            | 11.1% (7.5-15.4)            | 11.6% (8.0-15.9)                              | 11.8% (8.1-16.1)                        | 11.6% (8.0-16.0)                                        |
| <b>High-income</b>                  | 19.4% (13.8-26.0)    | 18.6% (13.3-24.9)         | 21.4% (16.7-27.1)          | 19.5% (13.8-26.2)           | 19.3% (13.7-26.0)           | 19.5% (13.9-26.4)                             | 20.4% (14.4-27.2)                       | 20.0% (14.2-26.6)                                       |
| <b>Low/middle income</b>            | 8.3% (5.5-11.7)      | 8.3% (5.5-11.7)           | 8.8% (6.4-12.0)            | 8.4% (5.6-11.7)             | 8.2% (5.4-11.6)             | 8.8% (5.8-12.4)                               | 8.7% (5.7-12.2)                         | 8.4% (5.6-11.8)                                         |

**Appendix Table 5: Regional & Global tPAFs of Unstable Housing on HIV and HCV including countries with imputed data.** *Estimates are the weighted average over all countries within a region with a PWID population size.*

|                                     | HIV tPAF         | HCV tPAF          |
|-------------------------------------|------------------|-------------------|
| Australasia                         | 8.8% (2.4-17.7)  | 10.1% (6.9-13.9)  |
| Caribbean                           | 11.9% (3.3-22.4) | 10.7% (7.5-14.6)  |
| Central Asia                        | 9.8% (2.6-18.8)  | 10.2% (7.2-13.8)  |
| East and South East Asia            | 5.6% (1.5-11.3)  | 6.8% (4.7-9.7)    |
| Eastern Europe                      | 2.2% (0.6-4.8)   | 2.9% (1.7-4.3)    |
| Latin America                       | 6.6% (1.7-14.4)  | 10.8% (7.5-14.8)  |
| Middle East & North Africa          | 5.5% (1.4-10.8)  | 6.8% (4.7-9.3)    |
| North America                       | 21.6% (6.7-36.3) | 26.2% (19.5-33.2) |
| Pacific Island States & Territories | -                | -                 |
| South Asia                          | 14.1% (4.3-25.6) | 21.4% (15-29.2)   |
| Sub Saharan Africa                  | 13% (3.3-25.5)   | 23% (15.6-32.4)   |
| Western Europe                      | 8.3% (2.2-16.1)  | 10.6% (7.4-14.3)  |
| <b>Global</b>                       | 7.5% (2.1-14.5)  | 10.7% (7.6-14.3)  |
| <b>High-income</b>                  | 14.1% (4.1-25.4) | 16.8% (11.9-22.8) |
| <b>Low/middle income</b>            | 6.5% (1.8-12.9)  | 8.6% (6.0-11.6)   |

**Appendix Table 6: Sensitivity analysis for the country-level tPAFs of Unstable Housing on HIV.** Countries marked with an asterisk denotes that the country had 'insufficient data' and so regional data for were used.

|                                 | Main Analyses    | Assortative Mixing | Unadjusted RR    | Decreasing incidence | Increasing incidence | All PWID start injecting stably housed | Unstably housed PWID have higher mortality rates |
|---------------------------------|------------------|--------------------|------------------|----------------------|----------------------|----------------------------------------|--------------------------------------------------|
| <b>Australasia</b>              |                  |                    |                  |                      |                      |                                        |                                                  |
| Australia                       | 9.0% (2.4-17.9)  | 24.2% (7.7-38.9)   | 12.7% (6.3-20.7) | 8.7% (2.1-17.2)      | 9.4% (2.5-18.5)      | 9.4% (2.6-18.5)                        | 9.0% (2.4-17.9)                                  |
| New Zealand                     | 6.8% (1.9-14.4)  | 25.8% (8.6-40.7)   | 9.7% (4.8-17.3)  | 6.7% (1.7-14.1)      | 7.2% (2.0-15.0)      | 7.1% (2.0-15.6)                        | 6.7% (1.8-14.7)                                  |
| <b>Caribbean</b>                |                  |                    |                  |                      |                      |                                        |                                                  |
| Antigua & Barbuda*              | 11.3% (3.2-21.4) | 15.7% (4.6-27.9)   | 15.7% (8.2-24.6) | 11.0% (3.1-21.1)     | 11.6% (3.3-22.2)     | 11.8% (3.3-22.4)                       | 11.4% (3.2-21.7)                                 |
| Bahamas*                        | 11.2% (3.1-21.2) | 15.8% (4.7-27.4)   | 15.6% (8.4-24.3) | 11.1% (3.0-20.5)     | 11.5% (3.2-21.8)     | 11.8% (3.4-22.7)                       | 11.4% (3.2-21.4)                                 |
| Barbados*                       | 11.3% (3.2-21.4) | 15.5% (4.7-27.6)   | 15.7% (8.4-24.8) | 11.0% (2.9-21.0)     | 11.5% (3.3-21.9)     | 11.8% (3.4-22.8)                       | 11.3% (3.2-21.8)                                 |
| Bermuda*                        | 11.0% (3.2-21.3) | 15.5% (4.7-27.4)   | 15.4% (8.5-24.5) | 10.7% (3.0-20.9)     | 11.4% (3.4-21.9)     | 11.6% (3.4-22.7)                       | 11.1% (3.2-21.6)                                 |
| Comm. of Puerto Rico            | 11.9% (3.3-22.4) | 20.1% (6.0-33.4)   | 16.5% (8.6-25.7) | 11.4% (3.1-21.7)     | 12.3% (3.3-23.3)     | 12.5% (3.4-24.1)                       | 12.1% (3.2-22.6)                                 |
| Cuba*                           | 11.1% (3.1-21.1) | 15.5% (4.5-27.6)   | 15.3% (8.0-24.2) | 10.7% (2.6-21.0)     | 11.4% (3.3-21.7)     | 11.6% (3.2-22.3)                       | 11.3% (3.1-21.4)                                 |
| Dominica*                       | 11.2% (3.1-21.3) | 15.6% (4.5-28.4)   | 15.5% (8.0-24.5) | 10.9% (2.9-21.0)     | 11.5% (3.3-21.8)     | 11.8% (3.3-22.5)                       | 11.3% (3.2-21.6)                                 |
| Dominican Republic*             | 11.4% (3.1-20.8) | 15.8% (4.6-27.4)   | 15.9% (8.0-24.2) | 11.1% (3.0-20.7)     | 11.8% (3.2-21.5)     | 12.0% (3.3-22.3)                       | 11.5% (3.2-21.1)                                 |
| Grenada*                        | 11.3% (3.1-21.0) | 15.6% (4.5-27.4)   | 15.5% (8.2-24.2) | 11.1% (2.9-20.6)     | 11.5% (3.4-21.6)     | 11.8% (3.3-22.3)                       | 11.3% (3.1-21.1)                                 |
| Haiti*                          | 11.2% (3.0-20.7) | 15.6% (4.5-27.0)   | 15.5% (8.1-23.9) | 11.0% (2.8-20.3)     | 11.4% (3.2-21.4)     | 11.7% (3.2-22.0)                       | 11.3% (3.0-21.0)                                 |
| Jamaica*                        | 11.4% (3.1-20.8) | 15.6% (4.5-27.5)   | 15.8% (8.4-24.3) | 11.1% (2.7-20.6)     | 11.6% (3.2-21.5)     | 11.9% (3.2-22.4)                       | 11.4% (3.1-21.2)                                 |
| Saint Kitts & Nevis*            | 11.2% (3.1-20.8) | 15.5% (4.6-28.0)   | 15.6% (8.2-24.4) | 11.0% (3.1-20.6)     | 11.6% (3.2-21.7)     | 11.9% (3.3-22.2)                       | 11.5% (3.2-21.1)                                 |
| Saint Lucia*                    | 11.2% (3.3-21.6) | 15.5% (4.6-27.8)   | 15.6% (8.5-24.4) | 10.9% (3.2-20.7)     | 11.5% (3.3-22.0)     | 11.9% (3.5-22.9)                       | 11.3% (3.4-21.7)                                 |
| St Vincent & the Grenadines*    | 11.2% (3.3-21.2) | 15.6% (4.5-27.6)   | 15.4% (8.4-24.3) | 11.0% (2.9-20.6)     | 11.5% (3.4-21.6)     | 11.8% (3.5-22.5)                       | 11.3% (3.2-21.4)                                 |
| Trinidad & Tobago*              | 10.9% (3.1-21.0) | 15.4% (4.6-27.9)   | 15.4% (8.1-23.9) | 10.8% (3.0-20.4)     | 11.3% (3.2-21.8)     | 11.6% (3.3-22.3)                       | 11.1% (3.1-21.4)                                 |
| <b>Central Asia</b>             |                  |                    |                  |                      |                      |                                        |                                                  |
| Kazakhstan                      | 9.8% (2.6-19.8)  | 16.3% (4.8-28.6)   | 13.8% (6.9-23.1) | 9.6% (2.4-18.7)      | 10.0% (2.6-20.7)     | 10.9% (2.8-22.1)                       | 9.8% (2.5-19.8)                                  |
| Kyrgyzstan                      | 11.4% (3.2-21.3) | 15.9% (4.8-27.7)   | 15.7% (8.4-24.9) | 11.0% (2.8-20.6)     | 11.6% (3.2-21.9)     | 12.3% (3.5-23.5)                       | 11.3% (3.2-21.4)                                 |
| Tajikistan*                     | 7.7% (2.1-15.7)  | 8.5% (2.4-16.5)    | 11.0% (5.7-18.1) | 7.9% (2.2-15.9)      | 7.5% (2.0-15.0)      | 8.3% (2.3-16.9)                        | 7.8% (2.1-15.8)                                  |
| Turkmenistan*                   | 10.0% (2.6-19.8) | 15.5% (4.6-27.2)   | 14.0% (7.1-23.0) | 9.7% (2.3-19.4)      | 10.1% (2.7-20.3)     | 11.1% (3.0-21.9)                       | 10.0% (2.7-19.8)                                 |
| Uzbekistan*                     | 10.1% (2.6-20.0) | 17.9% (5.5-30.7)   | 14.2% (7.4-23.1) | 9.8% (2.4-19.0)      | 10.4% (2.7-20.8)     | 11.1% (3.0-21.8)                       | 10.1% (2.6-20.0)                                 |
| <b>East and South East Asia</b> |                  |                    |                  |                      |                      |                                        |                                                  |
| Brunei Darussalam*              | 5.6% (1.4-12.3)  | 8.8% (2.5-18.0)    | 8.0% (4.0-14.7)  | 5.6% (1.3-12.0)      | 5.8% (1.5-12.8)      | 6.1% (1.6-13.4)                        | 5.6% (1.5-12.4)                                  |
| Cambodia                        | 9.1% (2.5-17.8)  | 10.4% (2.9-19.7)   | 12.8% (6.7-20.8) | 9.0% (2.8-17.7)      | 9.1% (2.4-17.6)      | 9.7% (2.7-19.1)                        | 9.2% (2.5-17.7)                                  |
| China                           | 5.9% (1.6-12.3)  | 10.2% (2.9-20.1)   | 8.5% (4.3-14.7)  | 5.8% (1.3-11.9)      | 6.0% (1.5-12.7)      | 6.5% (1.8-13.8)                        | 5.9% (1.7-12.2)                                  |
| Hong Kong (China)*              | 4.9% (1.2-10.0)  | 8.1% (2.1-16.1)    | 7.1% (3.4-12.0)  | 4.8% (1.1-10.0)      | 5.1% (1.1-10.3)      | 5.2% (1.3-10.7)                        | 4.9% (1.2-10.1)                                  |
| Indonesia*                      | 3.5% (0.9-7.4)   | 3.3% (0.9-6.9)     | 5.0% (2.4-8.9)   | 3.8% (1.0-8.2)       | 3.2% (0.8-7.0)       | 3.6% (0.9-7.6)                         | 3.5% (0.9-7.4)                                   |
| Japan*                          | 5.8% (1.5-11.7)  | 9.0% (2.4-17.7)    | 8.3% (3.9-14.1)  | 5.7% (1.2-11.5)      | 5.8% (1.3-12.1)      | 6.3% (1.6-13.1)                        | 5.8% (1.5-11.7)                                  |
| Lao PDR*                        | 5.4% (1.4-11.3)  | 7.7% (2.1-16.8)    | 7.7% (3.8-13.7)  | 5.4% (1.3-11.3)      | 5.4% (1.3-11.6)      | 5.8% (1.5-12.5)                        | 5.3% (1.4-11.3)                                  |
| Malaysia*                       | 5.0% (1.3-10.5)  | 7.5% (2.0-14.6)    | 7.1% (3.5-12.3)  | 5.1% (1.2-10.3)      | 5.1% (1.1-10.7)      | 5.3% (1.3-11.2)                        | 5.0% (1.3-10.3)                                  |
| Mongolia*                       | 5.8% (1.5-12.4)  | 9.0% (2.4-18.2)    | 8.3% (4.0-14.8)  | 5.7% (1.3-12.0)      | 5.8% (1.2-12.5)      | 6.2% (1.6-13.6)                        | 5.7% (1.5-12.3)                                  |
| Myanmar*                        | 6.0% (1.6-13.2)  | 7.1% (1.9-14.8)    | 8.7% (4.4-16.2)  | 6.3% (1.6-13.9)      | 5.7% (1.3-12.9)      | 6.7% (1.8-15.1)                        | 6.0% (1.6-13.0)                                  |
| North Korea*                    | 5.6% (1.4-12.3)  | 8.7% (2.3-18.4)    | 8.1% (3.8-14.7)  | 5.6% (1.3-12.4)      | 5.7% (1.2-12.6)      | 6.1% (1.6-13.5)                        | 5.6% (1.4-12.5)                                  |
| Philippines*                    | 5.4% (1.5-11.6)  | 7.3% (2.1-15.3)    | 7.9% (3.9-14.1)  | 5.6% (1.2-11.8)      | 5.4% (1.3-11.8)      | 5.9% (1.6-13.1)                        | 5.4% (1.4-11.5)                                  |
| Republic of Korea               | NA               | NA                 | NA               | NA                   | NA                   | NA                                     | NA                                               |
| Singapore*                      | 5.6% (1.5-11.9)  | 8.8% (2.5-17.2)    | 8.1% (3.9-14.0)  | 5.7% (1.5-11.9)      | 5.7% (1.2-12.1)      | 6.1% (1.7-12.9)                        | 5.6% (1.5-11.8)                                  |
| Taiwan                          | 0.4% (0.1-1.1)   | 1.0% (0.2-2.4)     | 0.6% (0.3-1.4)   | 0.5% (-0.9-2.1)      | 0.4% (-1.0-2.0)      | 0.5% (0.1-1.2)                         | 0.4% (0.1-1.1)                                   |
| Thailand*                       | 5.0% (1.2-10.5)  | 6.1% (1.5-12.7)    | 7.1% (3.5-12.5)  | 5.1% (1.2-10.7)      | 5.0% (1.2-10.3)      | 5.4% (1.4-11.4)                        | 5.0% (1.3-10.5)                                  |
| Timor Leste*                    | 5.6% (1.4-12.4)  | 8.8% (2.4-18.0)    | 8.2% (4.0-14.7)  | 5.7% (1.4-12.2)      | 5.8% (1.4-12.7)      | 6.1% (1.6-13.4)                        | 5.6% (1.4-12.4)                                  |

|                                       | <b>Main Analyses</b> | <b>Assortative Mixing</b> | <b>Unadjusted RR</b> | <b>Decreasing incidence</b> | <b>Increasing incidence</b> | <b>All PWID start injecting stably housed</b> | <b>Unstably housed PWID have higher mortality rates</b> |
|---------------------------------------|----------------------|---------------------------|----------------------|-----------------------------|-----------------------------|-----------------------------------------------|---------------------------------------------------------|
| Viet Nam                              | 6.5% (0.9-18.1)      | 9.2% (1.6-22.2)           | 9.4% (2.0-22.3)      | 6.5% (0.9-17.9)             | 6.5% (0.5-18.2)             | 7.2% (1.0-20.1)                               | 6.4% (0.9-18.2)                                         |
| <b>Eastern Europe</b>                 |                      |                           |                      |                             |                             |                                               |                                                         |
| Armenia*                              | 4.4% (1.1-9.3)       | 13.2% (3.7-24.3)          | 6.4% (3.0-11.3)      | 4.4% (0.9-9.3)              | 4.7% (0.9-10.1)             | 4.8% (1.2-10.5)                               | 4.4% (1.1-9.4)                                          |
| Azerbaijan*                           | 4.2% (1.1-9.1)       | 9.3% (2.4-18.5)           | 6.1% (2.9-10.9)      | 4.2% (0.6-9.3)              | 4.4% (0.8-9.7)              | 4.5% (1.1-9.9)                                | 4.2% (1.1-9.0)                                          |
| Belarus*                              | 3.4% (0.9-7.1)       | 4.3% (1.2-8.9)            | 5.0% (2.4-8.7)       | 3.5% (0.9-7.3)              | 3.4% (0.8-7.3)              | 3.6% (0.9-7.7)                                | 3.4% (0.8-7.2)                                          |
| Bosnia & Herzegovina*                 | 4.1% (1.0-8.9)       | 25.2% (8.2-39.5)          | 6.0% (2.9-10.4)      | 4.2% (0.6-8.6)              | 4.3% (0.8-9.4)              | 4.4% (1.1-9.6)                                | 4.1% (1.1-8.8)                                          |
| Bulgaria                              | 2.1% (0.5-4.6)       | 6.3% (1.7-13.9)           | 3.1% (1.4-5.5)       | 2.2% (-0.1-5.1)             | 2.2% (-0.1-5.2)             | 2.3% (0.6-5.2)                                | 2.1% (0.5-4.6)                                          |
| Czech Republic                        | 25.8% (8.0-42.1)     | 26.7% (8.9-41.7)          | 33.5% (19.8-46.6)    | 24.4% (7.4-40.1)            | 27.1% (8.5-44.1)            | 26.8% (8.3-43.7)                              | 26.4% (8.4-42.7)                                        |
| Estonia*                              | 2.1% (0.6-4.5)       | 1.9% (0.5-4.1)            | 3.0% (1.4-5.4)       | 2.4% (0.6-4.9)              | 1.9% (0.4-4.0)              | 2.0% (0.6-4.5)                                | 2.1% (0.6-4.5)                                          |
| Georgia                               | 1.9% (0.5-5.1)       | 12.3% (3.6-23.9)          | 2.8% (1.1-6.2)       | 2.1% (-0.2-5.2)             | 2.0% (-0.4-5.4)             | 2.0% (0.5-5.5)                                | 1.9% (0.5-5.0)                                          |
| Hungary                               | 12.0% (3.1-25.3)     | 26.4% (8.8-41.4)          | 16.7% (7.0-29.3)     | 11.2% (3.0-24.0)            | 12.6% (3.0-26.3)            | 12.7% (3.4-26.5)                              | 12.1% (3.1-25.4)                                        |
| Latvia                                | 0.7% (0.2-2.0)       | 0.9% (0.2-2.4)            | 1.1% (0.4-2.4)       | 0.9% (-0.3-2.3)             | 0.7% (-0.5-2.1)             | 0.8% (0.2-2.0)                                | 0.7% (0.2-1.9)                                          |
| Lithuania                             | 3.8% (1.0-8.5)       | 9.7% (2.6-21.7)           | 5.6% (2.7-10.1)      | 3.9% (0.6-8.6)              | 4.0% (0.8-9.0)              | 4.2% (1.1-9.1)                                | 3.8% (1.0-8.4)                                          |
| Moldova                               | 3.4% (0.9-7.8)       | 4.1% (1.1-10.3)           | 4.9% (2.3-9.4)       | 3.5% (0.7-8.0)              | 3.4% (0.8-7.9)              | 3.6% (1.0-8.2)                                | 3.4% (0.9-7.8)                                          |
| Poland                                | 9.4% (2.6-17.7)      | 12.3% (3.6-22.0)          | 13.1% (6.7-20.5)     | 9.2% (2.5-17.5)             | 9.4% (2.6-17.9)             | 9.8% (2.7-18.6)                               | 9.4% (2.6-17.7)                                         |
| Romania                               | 8.0% (1.4-20.5)      | 10.3% (2.0-24.5)          | 11.8% (3.4-24.0)     | 8.1% (1.6-20.0)             | 8.0% (1.3-20.7)             | 8.6% (1.5-21.7)                               | 8.1% (1.4-20.4)                                         |
| Russian Federation                    | 2.2% (0.5-5.0)       | 2.5% (0.6-5.9)            | 3.2% (1.4-6.1)       | 2.4% (0.5-5.3)              | 2.1% (0.3-5.1)              | 2.3% (0.6-5.5)                                | 2.2% (0.5-5.1)                                          |
| Slovakia*                             | 4.7% (1.1-10.4)      | 26.6% (8.8-41.7)          | 6.6% (3.2-12.1)      | 4.6% (0.6-10.0)             | 4.9% (1.0-11.2)             | 5.1% (1.2-11.3)                               | 4.7% (1.2-10.4)                                         |
| Ukraine                               | 0.3% (0.1-0.6)       | 0.4% (0.1-1.0)            | 0.4% (0.2-0.8)       | 0.4% (-0.9-2.0)             | 0.2% (-1.1-1.3)             | 0.3% (0.1-0.7)                                | 0.3% (0.1-0.6)                                          |
| <b>Latin America</b>                  |                      |                           |                      |                             |                             |                                               |                                                         |
| Argentina*                            | 6.4% (1.9-13.4)      | 5.9% (1.7-12.4)           | 9.1% (4.6-15.7)      | 6.7% (1.9-13.7)             | 6.1% (1.7-12.8)             | 6.4% (1.8-13.4)                               | 6.5% (1.9-13.3)                                         |
| Belize*                               | 7.8% (2.0-16.1)      | 8.1% (2.2-17.1)           | 11.0% (5.5-18.8)     | 8.0% (2.0-16.5)             | 7.8% (2.0-15.7)             | 8.0% (2.1-16.4)                               | 7.8% (2.1-16.0)                                         |
| Bolivia*                              | 7.6% (2.1-16.0)      | 8.0% (2.2-17.8)           | 10.9% (5.5-18.8)     | 7.8% (2.1-16.0)             | 7.5% (2.0-16.2)             | 7.8% (2.2-16.7)                               | 7.6% (2.2-16.3)                                         |
| Brazil*                               | 6.5% (1.6-14.6)      | 6.1% (1.5-15.1)           | 9.3% (3.7-17.1)      | 6.8% (1.7-15.0)             | 6.1% (1.5-14.3)             | 6.4% (1.6-14.8)                               | 6.5% (1.7-14.6)                                         |
| Chile*                                | 7.5% (2.1-15.5)      | 8.1% (2.1-17.1)           | 10.9% (5.3-18.4)     | 7.7% (1.9-15.7)             | 7.5% (2.0-15.5)             | 7.7% (2.2-16.0)                               | 7.6% (2.1-15.8)                                         |
| Colombia*                             | 16.8% (4.9-33.5)     | 23.7% (7.8-38.7)          | 23.4% (12.5-38.3)    | 15.7% (4.4-31.0)            | 17.7% (4.9-35.7)            | 19.2% (5.5-37.6)                              | 16.8% (4.9-33.8)                                        |
| Costa Rica*                           | 7.9% (2.0-15.8)      | 8.3% (2.2-17.9)           | 11.1% (5.4-18.9)     | 8.2% (2.1-16.0)             | 7.8% (2.1-16.1)             | 8.1% (2.1-16.7)                               | 7.9% (2.0-16.0)                                         |
| Ecuador*                              | 7.7% (2.0-16.1)      | 8.1% (2.2-17.5)           | 10.9% (5.2-18.9)     | 7.9% (2.0-16.0)             | 7.6% (2.0-16.1)             | 7.8% (2.1-16.5)                               | 7.7% (2.1-16.2)                                         |
| El Salvador*                          | 7.8% (2.0-15.7)      | 8.2% (2.2-17.4)           | 11.0% (5.5-18.7)     | 8.0% (2.1-15.8)             | 7.7% (2.1-15.6)             | 7.9% (2.1-16.3)                               | 7.8% (2.0-15.9)                                         |
| Guatemala*                            | 7.8% (2.0-16.2)      | 8.0% (2.0-17.5)           | 11.0% (5.2-18.9)     | 8.0% (1.9-16.1)             | 7.7% (1.9-16.2)             | 7.9% (2.0-16.8)                               | 7.8% (1.9-16.4)                                         |
| Guyana*                               | 7.7% (2.2-16.1)      | 8.1% (2.2-17.9)           | 10.9% (5.6-19.0)     | 7.9% (2.2-16.2)             | 7.5% (2.1-16.2)             | 7.8% (2.3-16.7)                               | 7.7% (2.2-16.1)                                         |
| Honduras*                             | 7.8% (2.2-15.4)      | 8.1% (2.2-16.7)           | 11.0% (5.6-18.6)     | 8.0% (2.3-15.7)             | 7.6% (2.2-15.3)             | 7.9% (2.3-16.0)                               | 7.8% (2.2-15.4)                                         |
| Mexico                                | 10.2% (2.7-19.8)     | 21.3% (6.7-34.6)          | 14.3% (7.0-23.1)     | 9.9% (2.5-19.3)             | 10.7% (3.0-20.6)            | 10.7% (2.8-20.6)                              | 10.3% (2.7-19.9)                                        |
| Nicaragua*                            | 12.7% (3.4-25.2)     | 21.3% (6.6-36.3)          | 17.8% (9.3-29.4)     | 12.3% (3.2-23.8)            | 13.3% (3.7-26.9)            | 13.8% (3.8-27.7)                              | 12.8% (3.6-25.3)                                        |
| Panama*                               | 7.7% (2.0-15.7)      | 8.0% (2.0-17.3)           | 10.9% (5.4-18.7)     | 7.9% (2.1-15.8)             | 7.6% (2.0-15.5)             | 7.9% (2.0-16.4)                               | 7.8% (2.0-15.9)                                         |
| Paraguay*                             | 9.8% (2.7-18.6)      | 16.5% (4.9-29.1)          | 13.8% (6.9-21.6)     | 9.6% (2.5-18.1)             | 10.2% (2.7-19.3)            | 10.3% (2.8-19.8)                              | 9.8% (2.7-18.8)                                         |
| Peru*                                 | 9.5% (2.6-18.4)      | 14.3% (4.1-25.7)          | 13.1% (6.6-21.6)     | 9.2% (2.6-18.1)             | 9.7% (2.8-18.9)             | 9.8% (2.7-19.4)                               | 9.5% (2.5-18.5)                                         |
| Suriname*                             | 7.7% (2.2-15.6)      | 8.0% (2.3-17.1)           | 11.0% (5.6-18.4)     | 7.8% (2.3-15.8)             | 7.5% (2.2-15.5)             | 7.8% (2.2-15.9)                               | 7.7% (2.2-15.7)                                         |
| Uruguay*                              | 9.2% (2.5-17.8)      | 12.1% (3.5-22.2)          | 12.8% (6.6-20.7)     | 9.1% (2.3-17.4)             | 9.3% (2.5-18.2)             | 9.5% (2.6-18.3)                               | 9.2% (2.6-17.9)                                         |
| Venezuela*                            | 7.8% (2.2-15.9)      | 8.0% (2.3-17.0)           | 11.1% (5.6-18.8)     | 8.0% (2.2-16.0)             | 7.5% (2.1-15.9)             | 7.9% (2.2-16.2)                               | 7.8% (2.2-16.0)                                         |
| <b>Middle East &amp; North Africa</b> |                      |                           |                      |                             |                             |                                               |                                                         |
| Algeria*                              | 6.0% (1.5-13.3)      | 20.3% (6.1-36.8)          | 8.6% (3.9-15.9)      | 5.8% (1.2-13.1)             | 6.2% (1.4-13.8)             | 6.5% (1.6-14.6)                               | 6.0% (1.5-13.2)                                         |
| Bahrain*                              | 5.9% (1.6-13.5)      | 15.4% (4.7-29.3)          | 8.5% (3.9-16.1)      | 5.6% (1.2-13.1)             | 6.0% (1.4-14.2)             | 6.3% (1.7-14.5)                               | 5.8% (1.6-13.5)                                         |
| Cyprus*                               | 6.2% (1.7-14.5)      | 23.2% (7.6-38.0)          | 9.1% (4.1-17.3)      | 6.1% (1.3-13.8)             | 6.5% (1.5-15.5)             | 6.8% (1.8-16.3)                               | 6.2% (1.6-14.6)                                         |
| Egypt*                                | 6.0% (1.5-14.0)      | 19.7% (6.0-34.0)          | 8.9% (4.0-16.8)      | 6.0% (1.2-13.5)             | 6.5% (1.5-14.7)             | 6.7% (1.7-15.3)                               | 6.1% (1.5-14.0)                                         |
| Iraq*                                 | 6.0% (1.5-13.8)      | 17.4% (5.4-31.8)          | 8.7% (3.9-16.5)      | 5.9% (1.5-13.2)             | 6.3% (1.3-14.3)             | 6.5% (1.6-15.0)                               | 6.0% (1.5-13.7)                                         |

|                              | <b>Main Analyses</b> | <b>Assortative Mixing</b> | <b>Unadjusted RR</b> | <b>Decreasing incidence</b> | <b>Increasing incidence</b> | <b>All PWID start injecting stably housed</b> | <b>Unstably housed PWID have higher mortality rates</b> |
|------------------------------|----------------------|---------------------------|----------------------|-----------------------------|-----------------------------|-----------------------------------------------|---------------------------------------------------------|
| Israel                       | NA                   | NA                        | NA                   | NA                          | NA                          | NA                                            | NA                                                      |
| Jordan*                      | 6.0% (1.5-13.5)      | 17.5% (5.1-32.1)          | 8.8% (3.8-16.1)      | 6.0% (1.3-13.2)             | 6.3% (1.3-14.3)             | 6.5% (1.7-14.8)                               | 6.0% (1.5-13.8)                                         |
| Kuwait*                      | 6.0% (1.6-13.5)      | 17.4% (5.4-31.9)          | 8.6% (3.9-16.1)      | 5.8% (1.5-13.5)             | 6.3% (1.3-14.4)             | 6.4% (1.7-15.1)                               | 6.0% (1.6-13.6)                                         |
| Lebanon                      | NA                   | NA                        | NA                   | NA                          | NA                          | NA                                            | NA                                                      |
| Libyan Arab Jamahiriya*      | 0.4% (0.1-1.0)       | 0.4% (0.1-0.9)            | 0.6% (0.3-1.2)       | 0.5% (0.1-1.1)              | 0.4% (0.1-0.9)              | 0.2% (0.1-0.6)                                | 0.4% (0.1-1.0)                                          |
| Morocco                      | 6.3% (1.7-14.4)      | 12.1% (3.3-27.6)          | 9.1% (3.9-17.2)      | 6.2% (1.5-14.2)             | 6.4% (1.5-14.8)             | 6.7% (1.7-15.5)                               | 6.3% (1.6-14.5)                                         |
| Occ. Palestinian Territories | NA                   | NA                        | NA                   | NA                          | NA                          | NA                                            | NA                                                      |
| Oman*                        | 5.4% (1.4-12.2)      | 9.8% (2.7-21.4)           | 7.9% (3.7-14.7)      | 5.4% (1.3-12.3)             | 5.7% (1.3-12.8)             | 5.9% (1.6-13.2)                               | 5.5% (1.4-12.3)                                         |
| Qatar*                       | 6.0% (1.4-14.1)      | 17.4% (5.1-32.0)          | 8.7% (3.6-16.8)      | 5.8% (1.3-13.3)             | 6.2% (1.1-14.7)             | 6.5% (1.6-15.2)                               | 5.9% (1.4-14.2)                                         |
| Saudi Arabia*                | 5.8% (1.5-12.9)      | 11.2% (3.2-22.3)          | 8.3% (3.8-15.1)      | 5.7% (1.3-12.5)             | 5.9% (1.4-13.2)             | 6.1% (1.6-13.7)                               | 5.8% (1.5-12.8)                                         |
| South Sudan*                 | 6.1% (1.5-14.1)      | 17.7% (5.1-32.1)          | 8.7% (3.8-17.0)      | 5.8% (1.2-13.7)             | 6.2% (1.4-14.9)             | 6.5% (1.5-15.4)                               | 6.0% (1.4-14.0)                                         |
| Sudan                        | NA                   | NA                        | NA                   | NA                          | NA                          | NA                                            | NA                                                      |
| Syrian Arab Rep.             | NA                   | NA                        | NA                   | NA                          | NA                          | NA                                            | NA                                                      |
| Tunisia                      | 3.4% (0.9-7.3)       | 13.8% (4.1-25.3)          | 4.9% (2.3-8.8)       | 3.3% (0.3-7.3)              | 3.5% (0.4-7.9)              | 3.7% (0.9-8.2)                                | 3.4% (0.9-7.3)                                          |
| Turkey*                      | 8.2% (2.0-18.9)      | 26.3% (8.7-41.1)          | 11.8% (5.2-22.6)     | 7.7% (1.6-17.5)             | 9.0% (1.8-20.6)             | 9.4% (2.4-22.0)                               | 8.2% (2.0-18.9)                                         |
| United Arab Emirates*        | 5.9% (1.5-14.0)      | 17.6% (5.1-31.7)          | 8.6% (4.0-16.8)      | 5.9% (1.3-13.8)             | 6.1% (1.3-14.6)             | 6.4% (1.7-15.3)                               | 5.9% (1.5-14.2)                                         |
| Yemen*                       | 6.0% (1.5-14.1)      | 17.6% (5.2-32.0)          | 8.7% (4.0-17.1)      | 5.8% (1.1-13.4)             | 6.3% (1.3-14.8)             | 6.5% (1.6-15.6)                               | 6.0% (1.5-14.3)                                         |
| <b>North America</b>         |                      |                           |                      |                             |                             |                                               |                                                         |
| Canada                       | 18.7% (5.7-33.0)     | 21.6% (7.0-35.7)          | 25.2% (14.1-37.0)    | 18.1% (5.5-32.5)            | 19.1% (6.0-33.7)            | 19.2% (6.0-34.2)                              | 18.9% (5.8-33.6)                                        |
| United States                | 22.0% (6.9-37.2)     | 23.8% (7.9-38.0)          | 29.2% (16.8-41.5)    | 21.1% (6.5-36.0)            | 22.7% (7.4-38.1)            | 22.7% (7.3-38.2)                              | 22.6% (7.1-38.3)                                        |
| <b>South Asia</b>            |                      |                           |                      |                             |                             |                                               |                                                         |
| Afghanistan                  | 24.7% (7.2-45.0)     | 25.6% (8.3-40.6)          | 33.3% (18.3-50.9)    | 23.0% (6.6-41.9)            | 26.6% (7.6-48.5)            | 28.3% (8.3-50.5)                              | 25.1% (7.3-45.2)                                        |
| Bangladesh                   | 10.2% (2.4-23.4)     | 25.9% (8.7-41.1)          | 14.6% (5.8-27.2)     | 9.9% (2.0-21.4)             | 10.8% (2.2-25.0)            | 11.4% (2.8-25.7)                              | 10.2% (2.4-23.2)                                        |
| Bhutan*                      | 15.6% (4.5-29.1)     | 16.7% (5.1-29.2)          | 21.2% (11.4-33.7)    | 15.4% (4.4-29.0)            | 15.6% (4.6-29.3)            | 16.7% (4.9-31.5)                              | 15.7% (4.6-29.4)                                        |
| India                        | 22.4% (6.6-39.8)     | 21.6% (6.8-35.9)          | 29.5% (15.6-44.3)    | 21.9% (6.6-38.9)            | 22.8% (6.7-40.6)            | 23.6% (7.2-41.6)                              | 22.9% (6.7-40.3)                                        |
| Iran                         | 17.7% (5.1-32.8)     | 19.8% (6.2-33.7)          | 23.9% (13.2-37.0)    | 17.3% (5.1-31.8)            | 17.9% (5.3-33.1)            | 18.7% (5.5-34.3)                              | 17.8% (5.2-32.8)                                        |
| Maldives                     | NA                   | NA                        | NA                   | NA                          | NA                          | NA                                            | NA                                                      |
| Nepal                        | 0.9% (0.2-2.3)       | 2.3% (0.6-5.4)            | 1.3% (0.5-2.8)       | 1.1% (-1.1-3.2)             | 0.9% (-1.3-3.4)             | 1.0% (0.2-2.7)                                | 0.9% (0.2-2.3)                                          |
| Pakistan                     | 11.5% (3.2-22.5)     | 11.2% (3.2-21.0)          | 16.1% (8.6-26.3)     | 12.1% (3.3-23.4)            | 10.9% (3.1-21.5)            | 12.2% (3.4-23.8)                              | 11.6% (3.2-22.3)                                        |
| Sri Lanka                    | NA                   | NA                        | NA                   | NA                          | NA                          | NA                                            | NA                                                      |
| <b>Sub Saharan Africa</b>    |                      |                           |                      |                             |                             |                                               |                                                         |
| Angola*                      | 17.4% (4.6-34.7)     | 23.2% (7.5-38.0)          | 24.0% (11.5-39.6)    | 16.5% (4.5-32.8)            | 18.4% (5.1-36.5)            | 19.1% (5.1-37.8)                              | 17.5% (4.7-34.7)                                        |
| Benin*                       | 12.6% (3.5-24.5)     | 15.0% (4.3-27.3)          | 17.5% (8.4-29.0)     | 12.4% (3.7-24.5)            | 12.8% (3.2-24.9)            | 13.2% (3.7-25.9)                              | 12.7% (3.5-24.8)                                        |
| Botswana*                    | 13.1% (3.4-26.1)     | 15.4% (4.4-28.3)          | 18.1% (8.7-30.3)     | 13.0% (3.3-25.8)            | 13.4% (3.6-26.4)            | 13.9% (3.7-27.6)                              | 13.1% (3.4-26.2)                                        |
| Burkina Faso*                | 15.1% (4.2-32.0)     | 16.5% (4.8-31.1)          | 21.2% (10.0-36.6)    | 15.0% (4.0-31.6)            | 15.2% (4.5-32.6)            | 16.5% (4.7-35.0)                              | 15.2% (4.3-32.1)                                        |
| Burundi*                     | 15.1% (4.0-30.8)     | 16.5% (4.7-29.8)          | 21.4% (10.5-35.5)    | 14.9% (3.7-30.6)            | 15.2% (4.2-30.5)            | 16.6% (4.3-33.7)                              | 15.3% (4.1-30.5)                                        |
| Cameroon*                    | 15.3% (4.2-31.1)     | 16.5% (4.9-30.7)          | 21.0% (10.5-36.0)    | 15.0% (4.3-30.7)            | 15.2% (4.4-31.6)            | 16.5% (4.8-34.0)                              | 15.4% (4.2-31.5)                                        |
| Cape Verde*                  | 15.2% (4.3-31.5)     | 16.6% (5.1-30.6)          | 21.0% (10.2-36.1)    | 14.9% (4.3-31.0)            | 15.2% (4.2-31.6)            | 16.4% (4.9-33.9)                              | 15.2% (4.4-31.8)                                        |
| Central African Republic*    | 15.0% (4.2-30.7)     | 16.6% (4.7-29.7)          | 21.1% (10.0-35.2)    | 14.9% (4.3-30.0)            | 15.1% (4.1-30.9)            | 16.4% (4.5-32.3)                              | 15.1% (4.1-31.1)                                        |
| Chad*                        | 15.4% (4.2-30.9)     | 16.5% (4.6-30.8)          | 21.4% (10.6-35.9)    | 15.1% (4.1-30.5)            | 15.4% (4.1-30.8)            | 16.5% (4.5-33.4)                              | 15.5% (4.2-31.3)                                        |
| Comoros*                     | 15.6% (4.0-30.6)     | 16.8% (4.7-30.2)          | 21.5% (10.4-36.1)    | 15.7% (4.0-30.7)            | 15.6% (4.2-30.7)            | 17.0% (4.5-33.4)                              | 15.7% (4.0-30.6)                                        |
| Congo (Kinshasa)*            | 16.7% (5.1-34.6)     | 18.7% (5.8-33.8)          | 23.0% (11.2-39.2)    | 16.1% (4.9-33.3)            | 17.1% (4.8-35.6)            | 18.0% (5.7-37.2)                              | 16.7% (5.1-35.0)                                        |
| Cote d'Ivoire                | 8.1% (1.9-19.5)      | 16.4% (4.6-31.9)          | 11.8% (4.5-23.1)     | 7.9% (1.8-18.0)             | 8.5% (1.7-20.3)             | 9.0% (2.1-21.9)                               | 8.2% (1.9-19.2)                                         |
| Djibouti*                    | 15.2% (4.5-31.2)     | 16.6% (5.0-31.0)          | 21.2% (10.6-36.8)    | 15.1% (4.5-30.3)            | 15.4% (4.4-31.6)            | 16.4% (4.8-33.2)                              | 15.5% (4.4-31.2)                                        |
| Equatorial Guinea*           | 14.8% (4.2-30.2)     | 16.2% (5.0-29.6)          | 20.7% (10.3-34.8)    | 14.7% (4.2-29.8)            | 15.1% (4.4-30.3)            | 16.1% (4.6-32.5)                              | 14.8% (4.3-30.2)                                        |
| Eritrea*                     | 15.4% (4.3-32.8)     | 16.8% (4.9-31.2)          | 21.4% (10.7-37.4)    | 15.3% (4.2-31.5)            | 15.4% (4.2-33.2)            | 16.7% (4.8-35.4)                              | 15.4% (4.4-33.4)                                        |

|                            | Main Analyses    | Assortative Mixing | Unadjusted RR     | Decreasing incidence | Increasing incidence | All PWID start injecting stably housed | Unstably housed PWID have higher mortality rates |
|----------------------------|------------------|--------------------|-------------------|----------------------|----------------------|----------------------------------------|--------------------------------------------------|
| Ethiopia*                  | 15.2% (4.2-31.3) | 16.4% (4.8-31.3)   | 21.1% (10.0-36.4) | 14.9% (3.9-30.4)     | 15.2% (4.2-31.9)     | 16.5% (4.5-34.2)                       | 15.3% (4.1-31.9)                                 |
| Gabon*                     | 15.5% (4.1-31.1) | 16.6% (4.6-29.9)   | 21.4% (10.5-36.0) | 15.3% (4.2-30.5)     | 15.3% (4.1-31.1)     | 16.7% (4.4-33.0)                       | 15.5% (4.0-30.7)                                 |
| Gambia*                    | 15.7% (4.5-32.3) | 17.0% (4.8-31.2)   | 21.9% (10.6-37.0) | 15.5% (4.3-31.7)     | 15.9% (4.1-32.8)     | 17.0% (4.7-34.8)                       | 15.9% (4.4-32.8)                                 |
| Ghana*                     | 13.1% (3.5-26.5) | 15.4% (4.4-28.3)   | 18.2% (9.0-30.8)  | 12.8% (3.6-26.2)     | 13.3% (3.6-26.9)     | 13.7% (3.8-27.9)                       | 13.2% (3.5-26.7)                                 |
| Guinea*                    | 15.8% (4.5-31.2) | 17.1% (4.9-30.2)   | 21.9% (10.3-35.8) | 15.4% (4.5-30.5)     | 15.8% (4.2-31.4)     | 16.9% (4.9-33.3)                       | 15.8% (4.4-31.2)                                 |
| Guinea-Bissau*             | 15.4% (4.2-31.1) | 16.6% (4.8-30.2)   | 21.3% (10.7-35.6) | 15.2% (4.2-30.6)     | 15.4% (4.2-31.1)     | 16.6% (4.6-33.2)                       | 15.4% (4.2-31.2)                                 |
| Kenya                      | 9.8% (2.5-20.6)  | 8.9% (2.4-19.2)    | 13.8% (6.5-23.8)  | 10.3% (2.9-20.9)     | 9.1% (2.5-19.8)      | 9.9% (2.7-21.3)                        | 9.8% (2.6-20.7)                                  |
| Lesotho*                   | 13.2% (3.6-26.4) | 15.5% (4.4-27.8)   | 18.4% (8.8-30.6)  | 13.0% (3.7-26.0)     | 13.3% (3.7-26.9)     | 14.0% (3.9-28.0)                       | 13.2% (3.6-26.4)                                 |
| Liberia*                   | 15.4% (4.4-32.1) | 16.5% (5.0-30.9)   | 21.2% (10.4-36.9) | 15.3% (4.1-31.5)     | 15.3% (4.3-32.1)     | 16.5% (4.6-34.9)                       | 15.4% (4.3-32.1)                                 |
| Madagascar*                | 18.4% (5.4-36.8) | 23.6% (7.5-39.2)   | 25.0% (13.0-41.7) | 17.3% (4.9-34.6)     | 19.3% (5.2-38.9)     | 19.8% (5.9-39.9)                       | 18.4% (5.3-37.2)                                 |
| Malawi*                    | 14.3% (3.8-29.6) | 16.2% (4.6-30.0)   | 19.9% (9.6-33.6)  | 14.1% (3.7-29.0)     | 14.6% (4.0-29.9)     | 15.4% (4.2-31.5)                       | 14.4% (3.9-29.9)                                 |
| Mali*                      | 15.8% (4.3-31.4) | 17.0% (4.9-30.2)   | 22.0% (10.3-36.5) | 15.4% (4.0-31.7)     | 16.0% (4.2-31.6)     | 17.2% (4.6-34.1)                       | 16.0% (4.2-31.8)                                 |
| Mauritania*                | 15.5% (4.1-31.4) | 16.6% (4.9-30.9)   | 21.4% (10.2-35.5) | 15.3% (4.1-30.6)     | 15.4% (4.0-31.8)     | 16.9% (4.5-33.6)                       | 15.5% (4.1-31.8)                                 |
| Mauritius*                 | 9.2% (2.4-19.8)  | 8.5% (2.2-18.0)    | 13.0% (6.0-23.0)  | 9.6% (2.5-20.6)      | 8.7% (2.3-18.8)      | 9.3% (2.4-19.8)                        | 9.2% (2.4-20.0)                                  |
| Mozambique*                | 9.4% (2.5-20.2)  | 8.4% (2.2-17.1)    | 13.4% (6.2-24.1)  | 10.3% (2.7-21.8)     | 8.7% (2.3-18.8)      | 9.6% (2.6-20.6)                        | 9.5% (2.5-20.2)                                  |
| Namibia*                   | 13.9% (3.9-29.4) | 15.9% (4.5-30.2)   | 19.4% (9.5-33.5)  | 13.8% (3.6-29.1)     | 13.9% (4.0-29.6)     | 14.9% (4.2-31.4)                       | 14.0% (3.7-29.4)                                 |
| Niger*                     | 15.9% (3.9-31.4) | 16.9% (4.5-30.8)   | 21.8% (10.0-36.2) | 15.6% (3.9-30.9)     | 15.8% (3.8-31.6)     | 17.2% (4.3-34.0)                       | 16.0% (3.8-32.0)                                 |
| Nigeria*                   | 14.6% (3.9-30.1) | 23.9% (7.7-38.6)   | 20.3% (9.4-34.7)  | 13.9% (3.6-28.9)     | 15.3% (4.0-31.9)     | 15.5% (4.2-32.3)                       | 14.7% (3.8-30.4)                                 |
| Rep. of the Congo*         | 15.6% (4.2-31.6) | 16.9% (4.7-30.9)   | 21.7% (9.9-36.3)  | 15.4% (4.0-31.2)     | 15.7% (4.1-31.5)     | 16.9% (4.6-34.2)                       | 15.8% (4.2-32.0)                                 |
| Rwanda*                    | 14.9% (4.1-30.9) | 16.6% (4.8-30.2)   | 20.5% (10.2-35.3) | 14.6% (4.5-29.8)     | 15.0% (4.1-30.7)     | 16.0% (4.5-32.8)                       | 14.9% (4.0-30.9)                                 |
| Sao Tome & Principe*       | 15.7% (4.2-31.7) | 17.1% (4.7-30.7)   | 21.5% (10.3-36.4) | 15.5% (4.2-31.2)     | 15.7% (4.3-31.8)     | 17.1% (4.5-34.4)                       | 15.8% (4.2-31.8)                                 |
| Senegal*                   | 16.8% (4.4-34.6) | 20.4% (6.3-36.3)   | 23.3% (10.6-39.6) | 16.1% (4.2-32.9)     | 17.3% (4.5-36.1)     | 18.6% (4.7-37.4)                       | 17.0% (4.3-34.7)                                 |
| Seychelles*                | 17.9% (4.8-37.2) | 23.9% (7.7-39.0)   | 24.7% (11.9-42.7) | 17.0% (4.4-35.8)     | 18.9% (5.0-39.1)     | 19.7% (5.2-40.0)                       | 18.1% (4.8-37.6)                                 |
| Sierra Leone*              | 17.3% (4.6-33.5) | 21.3% (6.3-35.8)   | 23.7% (11.0-38.4) | 16.5% (4.4-32.0)     | 18.0% (5.0-34.9)     | 18.8% (5.3-36.5)                       | 17.4% (4.7-34.1)                                 |
| Somalia*                   | 16.1% (4.1-31.1) | 17.0% (4.4-30.3)   | 22.1% (10.2-36.1) | 16.0% (4.1-30.5)     | 16.0% (4.0-31.4)     | 17.4% (4.6-33.5)                       | 16.2% (4.2-31.5)                                 |
| South Africa               | 20.3% (5.8-36.8) | 21.0% (6.7-35.1)   | 27.1% (14.1-42.1) | 19.7% (5.5-35.7)     | 20.8% (6.2-37.8)     | 21.2% (6.3-38.9)                       | 20.5% (5.9-37.4)                                 |
| Swaziland*                 | 13.4% (3.7-26.5) | 15.5% (4.4-28.4)   | 18.6% (8.9-31.4)  | 13.1% (3.3-25.9)     | 13.7% (3.8-27.3)     | 14.4% (3.9-28.2)                       | 13.4% (3.7-26.7)                                 |
| Togo*                      | 8.4% (2.2-17.1)  | 10.7% (3.0-21.2)   | 11.8% (5.9-20.3)  | 8.4% (2.2-17.0)      | 8.3% (2.1-17.0)      | 9.2% (2.5-19.2)                        | 8.4% (2.2-17.2)                                  |
| Uganda*                    | 14.8% (3.9-30.6) | 16.3% (4.6-30.6)   | 20.3% (9.9-35.1)  | 14.6% (3.9-30.3)     | 14.8% (4.0-30.6)     | 15.9% (4.4-32.8)                       | 14.8% (4.0-30.7)                                 |
| United Rep. of Tanzania    | 12.2% (3.0-26.5) | 12.0% (3.1-24.9)   | 16.9% (7.4-30.6)  | 12.5% (3.0-26.8)     | 11.6% (3.0-26.0)     | 13.0% (3.3-28.4)                       | 12.1% (3.0-26.5)                                 |
| Zambia*                    | 13.9% (3.7-28.7) | 15.8% (4.7-29.2)   | 19.2% (9.7-33.2)  | 13.7% (3.6-28.1)     | 14.1% (4.0-29.4)     | 14.9% (4.1-30.9)                       | 13.9% (3.9-29.1)                                 |
| Zimbabwe*                  | 13.9% (3.6-27.9) | 15.7% (4.6-29.5)   | 19.3% (9.2-32.3)  | 13.8% (3.7-27.5)     | 14.1% (4.0-28.3)     | 14.9% (4.2-29.5)                       | 14.1% (3.8-27.8)                                 |
| <b>Western Europe</b>      |                  |                    |                   |                      |                      |                                        |                                                  |
| Albania                    | 15.4% (4.3-28.0) | 25.5% (8.5-40.7)   | 20.8% (11.0-32.2) | 14.6% (4.0-26.8)     | 16.1% (4.7-29.3)     | 16.1% (4.7-29.6)                       | 15.4% (4.5-28.0)                                 |
| Andorra*                   | 11.8% (3.3-22.7) | 21.5% (6.7-35.3)   | 16.5% (8.4-26.2)  | 11.4% (3.1-22.0)     | 12.2% (3.4-23.3)     | 12.4% (3.4-23.9)                       | 11.8% (3.3-22.5)                                 |
| Austria                    | 8.4% (2.2-16.9)  | 25.2% (8.3-40.0)   | 11.8% (5.5-20.0)  | 8.1% (1.9-16.5)      | 8.8% (2.2-17.6)      | 8.8% (2.4-17.9)                        | 8.3% (2.3-16.8)                                  |
| Belgium                    | 15.0% (4.1-29.1) | 23.1% (7.4-37.7)   | 20.6% (10.4-33.0) | 14.5% (3.7-28.2)     | 15.6% (4.3-30.0)     | 15.7% (4.3-30.1)                       | 15.2% (4.2-29.3)                                 |
| Croatia                    | 8.6% (2.2-18.4)  | 25.8% (8.3-40.6)   | 12.1% (5.7-21.6)  | 8.4% (1.9-17.7)      | 9.0% (2.2-19.1)      | 9.1% (2.4-19.1)                        | 8.6% (2.2-18.4)                                  |
| Denmark                    | 13.3% (3.8-26.6) | 24.9% (8.2-39.6)   | 18.3% (9.2-30.0)  | 12.9% (3.7-25.6)     | 13.8% (3.7-27.5)     | 13.7% (3.9-27.3)                       | 13.4% (3.7-26.4)                                 |
| England                    | 20.4% (6.1-35.9) | 26.3% (8.7-41.4)   | 27.3% (15.2-40.6) | 19.6% (5.6-34.6)     | 21.2% (6.5-37.3)     | 21.3% (6.5-37.4)                       | 20.7% (6.4-36.4)                                 |
| Finland*                   | 12.0% (3.4-22.8) | 25.1% (8.2-39.7)   | 16.6% (8.7-26.6)  | 11.4% (3.2-22.2)     | 12.6% (3.5-24.0)     | 12.7% (3.6-24.5)                       | 12.0% (3.5-23.2)                                 |
| Form. Yug. Rep. Macedonia* | 11.7% (3.4-22.7) | 21.5% (6.8-35.1)   | 16.2% (8.7-26.4)  | 11.3% (3.0-21.8)     | 12.3% (3.5-23.8)     | 12.3% (3.5-24.2)                       | 11.8% (3.3-22.9)                                 |
| France                     | 6.2% (1.6-12.9)  | 12.7% (3.5-24.2)   | 8.9% (4.3-15.2)   | 6.2% (1.4-12.7)      | 6.4% (1.6-13.4)      | 6.6% (1.7-13.8)                        | 6.2% (1.6-12.9)                                  |
| Germany                    | 7.8% (2.1-15.7)  | 19.0% (5.9-32.3)   | 10.9% (5.6-18.4)  | 7.6% (1.9-15.7)      | 8.2% (2.3-16.4)      | 8.1% (2.3-16.8)                        | 7.7% (2.1-15.9)                                  |
| Greece                     | 14.8% (4.4-27.7) | 21.5% (6.9-35.7)   | 20.2% (10.9-31.9) | 14.2% (4.2-27.1)     | 15.4% (4.5-28.8)     | 15.5% (4.6-29.2)                       | 15.0% (4.4-28.1)                                 |
| Greenland*                 | 11.7% (3.2-22.9) | 21.3% (7.0-35.5)   | 16.3% (8.8-26.5)  | 11.5% (3.1-22.0)     | 12.0% (3.5-23.8)     | 12.4% (3.6-24.0)                       | 11.7% (3.3-23.3)                                 |



|                   | <b>Main Analyses</b> | <b>Assortative Mixing</b> | <b>Unadjusted RR</b> | <b>Decreasing incidence</b> | <b>Increasing incidence</b> | <b>All PWID start injecting stably housed</b> | <b>Unstably housed PWID have higher mortality rates</b> |
|-------------------|----------------------|---------------------------|----------------------|-----------------------------|-----------------------------|-----------------------------------------------|---------------------------------------------------------|
| Iceland*          | 20.8% (6.3-36.6)     | 24.5% (8.0-39.3)          | 27.8% (15.5-41.2)    | 19.8% (6.0-35.1)            | 21.6% (6.5-38.3)            | 22.0% (6.8-39.3)                              | 21.0% (6.2-36.8)                                        |
| Ireland           | 3.2% (0.8-7.0)       | 10.2% (2.7-19.7)          | 4.6% (2.2-8.5)       | 3.3% (0.4-7.1)              | 3.4% (0.5-7.4)              | 3.5% (0.9-7.7)                                | 3.2% (0.8-6.9)                                          |
| Italy             | 8.6% (2.4-17.1)      | 17.8% (5.5-30.3)          | 12.2% (6.4-19.8)     | 8.2% (1.9-16.5)             | 9.1% (2.3-17.6)             | 9.3% (2.6-18.4)                               | 8.6% (2.3-17.1)                                         |
| Liechtenstein*    | 11.8% (3.4-22.9)     | 21.3% (6.7-35.4)          | 16.5% (8.8-26.6)     | 11.4% (3.3-22.3)            | 12.2% (3.5-23.5)            | 12.5% (3.6-24.1)                              | 11.8% (3.4-22.9)                                        |
| Luxembourg*       | 12.1% (3.5-23.1)     | 24.9% (8.2-39.4)          | 16.8% (9.0-26.5)     | 11.6% (3.2-22.0)            | 12.7% (3.7-24.0)            | 12.8% (3.7-24.5)                              | 12.1% (3.4-23.4)                                        |
| Malta*            | 12.2% (3.3-23.5)     | 26.0% (8.5-40.9)          | 16.7% (8.8-27.0)     | 11.6% (3.0-22.6)            | 12.8% (3.5-24.5)            | 12.8% (3.5-24.8)                              | 12.2% (3.4-23.5)                                        |
| Monaco*           | 11.8% (3.3-23.4)     | 21.5% (6.8-35.8)          | 16.5% (8.8-26.8)     | 11.4% (3.0-22.5)            | 12.4% (3.4-24.7)            | 12.5% (3.6-25.2)                              | 11.9% (3.4-23.9)                                        |
| Montenegro*       | 14.7% (4.0-28.3)     | 26.4% (8.8-41.5)          | 20.2% (10.4-32.8)    | 13.7% (3.7-27.0)            | 15.6% (4.0-30.2)            | 16.1% (4.3-31.6)                              | 14.6% (4.0-28.4)                                        |
| Netherlands       | 7.5% (2.1-14.7)      | 21.6% (6.8-35.5)          | 10.7% (5.7-17.4)     | 7.3% (2.0-14.3)             | 7.8% (2.1-15.5)             | 8.0% (2.2-15.9)                               | 7.5% (2.1-14.7)                                         |
| Northern Ireland* | 12.0% (3.2-22.6)     | 21.6% (6.8-35.4)          | 16.5% (8.4-25.8)     | 11.5% (3.0-21.8)            | 12.4% (3.4-23.8)            | 12.7% (3.3-23.9)                              | 12.0% (3.2-22.7)                                        |
| Norway            | 13.4% (3.9-26.5)     | 25.9% (8.6-40.6)          | 18.8% (10.0-30.3)    | 13.0% (3.5-25.7)            | 14.1% (4.2-27.7)            | 14.0% (4.1-27.8)                              | 13.6% (3.8-26.6)                                        |
| Portugal*         | 10.7% (3.0-20.8)     | 13.7% (3.9-24.6)          | 14.9% (7.9-23.9)     | 10.6% (2.9-20.7)            | 10.9% (3.0-21.4)            | 11.2% (3.1-21.8)                              | 10.7% (3.0-20.8)                                        |
| San Marino*       | 11.8% (3.3-22.9)     | 21.5% (6.6-35.4)          | 16.5% (8.5-26.2)     | 11.5% (3.1-22.1)            | 12.3% (3.4-23.8)            | 12.6% (3.6-24.3)                              | 11.9% (3.3-23.2)                                        |
| Scotland          | 13.3% (3.5-24.7)     | 25.7% (8.5-40.7)          | 18.3% (9.5-28.1)     | 12.8% (3.3-23.8)            | 13.9% (4.0-25.8)            | 14.0% (3.8-25.9)                              | 13.3% (3.7-24.7)                                        |
| Serbia            | NA                   | NA                        | NA                   | NA                          | NA                          | NA                                            | NA                                                      |
| Slovenia          | 5.0% (1.2-11.2)      | 24.7% (8.0-39.0)          | 7.1% (3.1-13.3)      | 4.9% (0.8-10.8)             | 5.2% (1.0-11.4)             | 5.3% (1.3-12.2)                               | 4.9% (1.2-10.8)                                         |
| Spain             | 10.3% (3.0-20.7)     | 10.6% (3.1-20.6)          | 14.5% (7.3-24.1)     | 10.5% (3.0-20.6)            | 10.3% (2.9-20.6)            | 10.6% (3.0-21.5)                              | 10.3% (2.9-20.8)                                        |
| Sweden            | 15.9% (4.6-29.7)     | 26.4% (8.9-41.7)          | 21.6% (11.5-33.6)    | 15.4% (4.3-29.1)            | 16.4% (4.8-30.9)            | 16.4% (4.6-30.8)                              | 16.2% (4.7-30.4)                                        |
| Switzerland       | 7.5% (2.0-15.0)      | 23.3% (7.7-37.9)          | 10.6% (5.5-17.8)     | 7.4% (1.8-14.5)             | 7.8% (2.1-15.8)             | 8.0% (2.2-16.3)                               | 7.5% (2.0-15.0)                                         |
| Wales*            | 23.7% (7.2-39.7)     | 25.2% (8.4-40.0)          | 31.1% (18.1-43.9)    | 22.8% (6.5-38.4)            | 24.6% (7.7-41.1)            | 24.5% (7.5-41.2)                              | 24.0% (7.4-39.9)                                        |

**Appendix Table 7: Sensitivity analysis for the tPAFs of Unstable Housing on HCV.** Countries marked with an asterisk denotes that the country had 'insufficient data' and so regional data for were used.

|                                 | Main Analyses    | Assortative Mixing | Higher RR in Europe | Decreasing incidence | Increasing incidence | All PWID start injecting stably housed | Treat 10% infected PWID per year | Unstably housed PWID have higher mortality rates |
|---------------------------------|------------------|--------------------|---------------------|----------------------|----------------------|----------------------------------------|----------------------------------|--------------------------------------------------|
| <b>Australasia</b>              |                  |                    |                     |                      |                      |                                        |                                  |                                                  |
| Australia                       | 11.1% (7.3-15.1) | 11.4% (7.6-15.4)   | 11.1% (7.3-15.1)    | 11.2% (7.5-15.3)     | 11.0% (7.4-14.9)     | 11.2% (7.6-15.4)                       | 11.8% (7.8-16.1)                 | 11.1% (7.4-15.2)                                 |
| New Zealand                     | 7.3% (4.2-12.0)  | 6.8% (4.0-11.3)    | 7.3% (4.2-12.0)     | 7.5% (4.4-12.2)      | 7.2% (4.2-11.8)      | 7.3% (4.2-11.9)                        | 8.3% (4.7-13.5)                  | 7.3% (4.3-11.8)                                  |
| <b>Caribbean</b>                |                  |                    |                     |                      |                      |                                        |                                  |                                                  |
| Antigua & Barbuda*              | 12.6% (9.0-16.6) | 11.9% (8.5-16.0)   | 12.6% (9.0-16.6)    | 12.9% (9.3-17.1)     | 12.3% (8.7-16.3)     | 12.7% (9.1-16.8)                       | 13.9% (9.9-18.5)                 | 12.6% (9.0-16.8)                                 |
| Bahamas*                        | 12.6% (8.9-16.9) | 12.1% (8.3-16.3)   | 12.6% (8.9-16.9)    | 12.9% (9.0-17.4)     | 12.3% (8.5-16.5)     | 12.7% (8.8-17.1)                       | 13.9% (9.7-18.4)                 | 12.6% (8.8-16.9)                                 |
| Barbados*                       | 12.6% (8.7-16.9) | 12.0% (8.2-16.2)   | 12.6% (8.7-16.9)    | 13.0% (9.1-17.3)     | 12.3% (8.5-16.6)     | 12.7% (8.8-17.0)                       | 13.9% (9.6-18.5)                 | 12.7% (8.9-17.0)                                 |
| Bermuda*                        | 12.7% (9.0-16.8) | 12.0% (8.5-16.2)   | 12.7% (9.0-16.8)    | 13.0% (9.1-17.4)     | 12.4% (8.7-16.5)     | 12.8% (8.9-17.1)                       | 14.0% (9.6-18.6)                 | 12.7% (8.9-16.9)                                 |
| Comm. of Puerto Rico            | 10.7% (7.5-14.6) | 9.6% (6.7-13.2)    | 10.7% (7.5-14.6)    | 11.2% (7.9-15.1)     | 10.1% (7.2-14.0)     | 10.4% (7.3-14.3)                       | 12.7% (8.7-17.0)                 | 10.7% (7.5-14.6)                                 |
| Cuba*                           | 12.6% (8.9-17.0) | 12.0% (8.5-16.1)   | 12.6% (8.9-17.0)    | 13.0% (9.2-17.4)     | 12.3% (8.7-16.6)     | 12.7% (9.0-17.3)                       | 13.9% (9.9-18.6)                 | 12.7% (9.0-17.1)                                 |
| Dominica*                       | 12.6% (9.0-16.7) | 12.0% (8.5-16.0)   | 12.6% (9.0-16.7)    | 12.9% (9.2-17.1)     | 12.3% (8.8-16.3)     | 12.7% (9.0-16.9)                       | 13.9% (9.9-18.5)                 | 12.7% (9.0-16.7)                                 |
| Dominican Republic*             | 12.7% (9.0-16.7) | 12.0% (8.4-16.1)   | 12.7% (9.0-16.7)    | 13.0% (9.3-17.1)     | 12.3% (8.8-16.4)     | 12.7% (9.0-16.8)                       | 14.0% (10.0-18.6)                | 12.7% (9.0-16.7)                                 |
| Grenada*                        | 12.5% (8.9-17.1) | 11.9% (8.2-16.2)   | 12.5% (8.9-17.1)    | 12.8% (9.2-17.4)     | 12.3% (8.6-16.7)     | 12.7% (8.9-17.2)                       | 13.9% (9.7-18.7)                 | 12.6% (8.9-17.1)                                 |
| Haiti*                          | 12.5% (8.8-16.8) | 11.8% (8.4-16.3)   | 12.5% (8.8-16.8)    | 12.8% (9.2-17.2)     | 12.2% (8.6-16.6)     | 12.6% (8.9-17.1)                       | 13.8% (9.8-18.4)                 | 12.5% (8.9-16.9)                                 |
| Jamaica*                        | 12.7% (9.0-17.0) | 11.9% (8.4-16.1)   | 12.7% (9.0-17.0)    | 13.0% (9.1-17.2)     | 12.2% (8.6-16.6)     | 12.7% (8.9-17.0)                       | 14.0% (9.8-18.5)                 | 12.7% (9.0-16.9)                                 |
| Saint Kitts & Nevis*            | 12.6% (8.9-17.1) | 11.9% (8.5-16.2)   | 12.6% (8.9-17.1)    | 13.0% (9.3-17.6)     | 12.3% (8.7-16.7)     | 12.6% (9.0-17.3)                       | 13.9% (9.8-18.7)                 | 12.6% (9.1-17.2)                                 |
| Saint Lucia*                    | 12.7% (8.9-16.9) | 12.0% (8.4-16.1)   | 12.7% (8.9-16.9)    | 13.0% (9.1-17.3)     | 12.3% (8.7-16.4)     | 12.7% (8.8-17.0)                       | 14.0% (10.1-18.6)                | 12.7% (8.9-16.9)                                 |
| St Vincent & the Grenadines*    | 12.7% (9.0-17.0) | 12.0% (8.5-16.2)   | 12.7% (9.0-17.0)    | 13.0% (9.3-17.4)     | 12.4% (8.8-16.6)     | 12.8% (9.0-17.1)                       | 14.0% (9.9-18.6)                 | 12.7% (9.1-17.0)                                 |
| Trinidad & Tobago*              | 12.5% (8.8-16.7) | 11.9% (8.2-15.8)   | 12.5% (8.8-16.7)    | 12.9% (9.1-17.1)     | 12.2% (8.5-16.2)     | 12.6% (8.8-16.9)                       | 13.9% (9.5-18.4)                 | 12.6% (8.7-16.7)                                 |
| <b>Central Asia</b>             |                  |                    |                     |                      |                      |                                        |                                  |                                                  |
| Kazakhstan                      | 9.4% (6.6-12.9)  | 8.7% (6.1-12.0)    | 9.4% (6.6-12.9)     | 10.0% (6.8-13.7)     | 8.8% (6.1-12.1)      | 9.6% (6.6-13.3)                        | 10.3% (7.1-14.2)                 | 9.4% (6.5-12.8)                                  |
| Kyrgyzstan                      | 13.8% (9.6-18.7) | 14.1% (10.1-18.6)  | 13.8% (9.6-18.7)    | 14.0% (9.6-19.1)     | 13.5% (9.6-18.1)     | 14.4% (10.0-19.6)                      | 14.4% (10.2-19.4)                | 13.8% (9.6-18.6)                                 |
| Tajikistan*                     | 9.4% (6.5-12.7)  | 8.7% (6.1-11.8)    | 9.4% (6.5-12.7)     | 9.9% (6.9-13.6)      | 8.9% (6.1-12.0)      | 9.6% (6.5-13.0)                        | 10.4% (7.1-14.1)                 | 9.4% (6.4-12.8)                                  |
| Turkmenistan*                   | 12.1% (8.1-17.3) | 13.3% (8.2-20.6)   | 12.1% (8.1-17.3)    | 12.3% (8.2-17.4)     | 11.9% (7.7-17.4)     | 12.9% (8.4-18.9)                       | 12.7% (8.5-17.8)                 | 12.1% (8.1-17.3)                                 |
| Uzbekistan*                     | 10.7% (7.5-14.8) | 10.4% (7.3-14.2)   | 10.7% (7.5-14.8)    | 11.1% (7.7-15.4)     | 10.3% (7.3-14.1)     | 11.1% (7.8-15.7)                       | 11.5% (8.1-15.9)                 | 10.7% (7.5-14.7)                                 |
| <b>East and South East Asia</b> |                  |                    |                     |                      |                      |                                        |                                  |                                                  |
| Brunei Darussalam*              | 6.9% (4.4-10.5)  | 7.0% (4.5-10.8)    | 6.9% (4.4-10.5)     | 7.1% (4.5-10.8)      | 6.7% (4.1-10.1)      | 7.2% (4.5-11.0)                        | 7.4% (4.6-11.0)                  | 6.9% (4.4-10.5)                                  |
| Cambodia*                       | 12.6% (8.8-17.1) | 12.4% (8.5-17.3)   | 12.6% (8.8-17.1)    | 12.9% (8.9-17.4)     | 12.2% (8.5-16.9)     | 12.9% (8.9-18.0)                       | 13.5% (9.4-18.3)                 | 12.6% (8.7-17.0)                                 |
| China                           | 7.4% (4.9-11.4)  | 8.0% (5.2-12.7)    | 7.4% (4.9-11.4)     | 7.6% (5.0-11.4)      | 7.2% (4.6-11.2)      | 7.8% (5.1-11.8)                        | 7.8% (5.1-11.8)                  | 7.4% (4.9-11.3)                                  |
| Hong Kong (China)*              | 4.3% (2.7-6.5)   | 3.8% (2.4-5.7)     | 4.3% (2.7-6.5)      | 4.6% (3.0-6.9)       | 4.0% (2.5-6.1)       | 4.1% (2.6-6.3)                         | 5.3% (2.9-8.2)                   | 4.3% (2.8-6.5)                                   |
| Indonesia*                      | 3.5% (2.2-5.4)   | 3.0% (1.9-4.7)     | 3.5% (2.2-5.4)      | 3.9% (2.5-6.0)       | 3.1% (1.9-4.9)       | 3.2% (1.9-5.1)                         | 4.5% (2.6-6.9)                   | 3.5% (2.2-5.4)                                   |
| Japan*                          | 5.7% (3.6-9.0)   | 5.3% (3.3-8.4)     | 5.7% (3.6-9.0)      | 6.1% (3.8-9.4)       | 5.4% (3.3-8.5)       | 5.8% (3.6-9.1)                         | 6.5% (3.9-10.1)                  | 5.7% (3.6-9.0)                                   |
| Lao PDR*                        | 6.8% (4.4-10.5)  | 6.9% (4.4-11.0)    | 6.8% (4.4-10.5)     | 7.1% (4.4-10.8)      | 6.6% (4.1-10.4)      | 7.1% (4.5-11.0)                        | 7.4% (4.7-11.2)                  | 6.8% (4.4-10.5)                                  |
| Malaysia*                       | 5.5% (3.4-8.1)   | 5.2% (3.2-7.6)     | 5.5% (3.4-8.1)      | 5.8% (3.6-8.4)       | 5.3% (3.3-7.8)       | 5.5% (3.4-8.2)                         | 6.2% (3.7-9.4)                   | 5.5% (3.5-8.1)                                   |
| Mongolia*                       | 6.9% (4.4-10.6)  | 7.0% (4.4-11.0)    | 6.9% (4.4-10.6)     | 7.1% (4.4-10.8)      | 6.7% (4.1-10.3)      | 7.1% (4.6-11.1)                        | 7.5% (4.7-11.4)                  | 6.9% (4.4-10.5)                                  |
| Myanmar*                        | 10.3% (6.7-16.1) | 12.3% (8.3-18.2)   | 10.3% (6.7-16.1)    | 10.3% (6.5-16.6)     | 10.1% (6.3-15.8)     | 11.6% (7.2-18.0)                       | 10.6% (6.9-16.5)                 | 10.3% (6.6-16.2)                                 |
| North Korea*                    | 6.9% (4.3-10.4)  | 7.1% (4.3-10.8)    | 6.9% (4.3-10.4)     | 7.1% (4.3-10.7)      | 6.7% (4.1-10.2)      | 7.2% (4.4-11.0)                        | 7.4% (4.6-11.2)                  | 6.9% (4.3-10.5)                                  |
| Philippines*                    | 8.1% (4.9-12.4)  | 9.6% (5.7-15.8)    | 8.1% (4.9-12.4)     | 8.1% (5.0-12.5)      | 8.0% (4.9-12.3)      | 8.6% (5.2-13.4)                        | 8.4% (5.2-12.7)                  | 8.1% (4.9-12.3)                                  |
| Republic of Korea*              | 7.5% (4.6-11.5)  | 7.5% (4.8-11.4)    | 7.5% (4.6-11.5)     | 7.8% (4.8-12.1)      | 7.1% (4.4-10.9)      | 8.0% (4.9-12.3)                        | 8.0% (5.0-12.2)                  | 7.5% (4.7-11.4)                                  |
| Singapore*                      | 7.4% (4.7-11.5)  | 8.2% (5.4-12.6)    | 7.4% (4.7-11.5)     | 7.6% (4.8-11.7)      | 7.3% (4.6-11.3)      | 7.8% (5.0-12.2)                        | 7.8% (4.9-12.1)                  | 7.4% (4.8-11.5)                                  |
| Taiwan                          | 0.3% (0.2-0.6)   | 0.3% (0.1-0.5)     | 0.3% (0.2-0.6)      | 0.4% (0.1-0.7)       | 0.3% (0.0-0.5)       | 0.3% (0.1-0.5)                         | 0.4% (-0.8-2.2)                  | 0.3% (0.2-0.6)                                   |

|                                       | <b>Main Analyses</b> | <b>Assortative Mixing</b> | <b>Higher RR in Europe</b> | <b>Decreasing incidence</b> | <b>Increasing incidence</b> | <b>All PWID start injecting stably housed</b> | <b>Treat 10% infected PWID per year</b> | <b>Unstably housed PWID have higher mortality rates</b> |
|---------------------------------------|----------------------|---------------------------|----------------------------|-----------------------------|-----------------------------|-----------------------------------------------|-----------------------------------------|---------------------------------------------------------|
| Thailand*                             | 3.7% (2.3-5.9)       | 3.2% (1.9-5.1)            | 3.7% (2.3-5.9)             | 4.1% (2.6-6.4)              | 3.3% (2.0-5.3)              | 3.3% (2.0-5.5)                                | 4.6% (2.6-7.4)                          | 3.7% (2.3-5.9)                                          |
| Timor Leste*                          | 6.8% (4.3-10.2)      | 6.9% (4.4-10.8)           | 6.8% (4.3-10.2)            | 7.1% (4.5-10.6)             | 6.7% (4.1-9.8)              | 7.1% (4.4-10.6)                               | 7.4% (4.6-10.9)                         | 6.8% (4.4-10.2)                                         |
| Viet Nam                              | 7.4% (1.6-16.7)      | 7.0% (1.5-15.8)           | 7.4% (1.6-16.7)            | 7.8% (1.7-17.3)             | 7.0% (1.4-16.0)             | 7.6% (1.6-17.0)                               | 8.2% (1.7-18.0)                         | 7.4% (1.6-16.7)                                         |
| <b>Eastern Europe</b>                 |                      |                           |                            |                             |                             |                                               |                                         |                                                         |
| Armenia*                              | 5.3% (3.5-8.0)       | 6.1% (3.9-9.4)            | 8.6% (5.3-13.6)            | 5.5% (3.4-8.4)              | 5.3% (3.3-8.0)              | 5.6% (3.6-8.5)                                | 5.6% (3.6-8.4)                          | 5.3% (3.4-8.1)                                          |
| Azerbaijan*                           | 4.3% (2.8-6.6)       | 4.2% (2.6-6.5)            | 6.9% (4.0-11.2)            | 4.6% (2.8-7.1)              | 4.2% (2.5-6.2)              | 4.4% (2.8-6.8)                                | 4.9% (2.8-7.4)                          | 4.3% (2.8-6.6)                                          |
| Belarus*                              | 4.5% (2.8-6.8)       | 4.5% (2.7-6.9)            | 7.2% (4.4-11.3)            | 4.7% (2.9-7.1)              | 4.4% (2.6-6.6)              | 4.6% (2.8-7.0)                                | 5.0% (2.9-7.6)                          | 4.5% (2.9-6.8)                                          |
| Bosnia & Herzegovina*                 | 5.1% (3.3-7.7)       | 6.1% (3.9-9.5)            | 8.1% (4.9-12.4)            | 5.2% (3.2-7.7)              | 5.1% (3.3-7.7)              | 5.2% (3.5-8.1)                                | 5.3% (3.4-7.9)                          | 5.1% (3.3-7.6)                                          |
| Bulgaria                              | 1.9% (1.3-2.7)       | 1.8% (1.2-2.5)            | 3.1% (2.0-4.5)             | 2.1% (1.3-3.1)              | 1.8% (1.1-2.7)              | 1.9% (1.3-2.7)                                | 2.3% (0.9-3.8)                          | 1.9% (1.3-2.7)                                          |
| Czech Republic                        | 32.0% (24.1-41.1)    | 33.4% (26.1-40.2)         | 43.9% (32.9-54.4)          | 31.2% (23.5-39.8)           | 32.7% (24.7-42.1)           | 33.1% (24.9-42.4)                             | 32.2% (24.4-41.3)                       | 32.7% (24.7-41.7)                                       |
| Estonia*                              | 3.4% (2.1-5.3)       | 3.0% (1.9-4.7)            | 5.3% (3.3-8.4)             | 3.6% (2.3-5.6)              | 3.1% (1.9-5.0)              | 3.2% (2.0-5.2)                                | 4.1% (2.3-6.4)                          | 3.4% (2.1-5.2)                                          |
| Georgia                               | 2.0% (0.9-3.6)       | 1.8% (0.8-3.4)            | 3.1% (1.3-5.9)             | 2.1% (0.8-3.8)              | 1.9% (0.7-3.4)              | 1.9% (0.9-3.5)                                | 2.2% (0.5-4.3)                          | 2.0% (0.9-3.6)                                          |
| Hungary                               | 13.7% (6.7-21.4)     | 14.1% (6.8-22.0)          | 20.6% (10.2-32.2)          | 13.8% (6.9-21.5)            | 13.5% (6.3-21.5)            | 14.0% (6.8-22.0)                              | 14.4% (6.9-22.3)                        | 13.7% (6.5-21.7)                                        |
| Latvia                                | 0.8% (0.3-1.5)       | 0.7% (0.3-1.4)            | 1.3% (0.5-2.5)             | 0.9% (0.3-1.7)              | 0.7% (0.2-1.5)              | 0.8% (0.3-1.5)                                | 1.0% (-0.3-2.4)                         | 0.8% (0.3-1.5)                                          |
| Lithuania                             | 4.9% (3.1-7.4)       | 5.6% (3.7-8.3)            | 7.8% (4.9-12.4)            | 5.0% (3.1-7.6)              | 4.9% (3.0-7.4)              | 5.1% (3.3-7.8)                                | 5.1% (3.2-7.8)                          | 4.9% (3.1-7.4)                                          |
| Moldova                               | 5.2% (3.2-7.8)       | 5.5% (3.3-8.6)            | 8.1% (5.1-13.0)            | 5.3% (3.2-8.0)              | 5.1% (3.1-7.7)              | 5.3% (3.3-8.0)                                | 5.5% (3.3-8.4)                          | 5.2% (3.2-7.7)                                          |
| Poland                                | 11.3% (8.2-15.0)     | 11.2% (8.1-14.6)          | 17.2% (12.0-23.4)          | 11.5% (8.2-15.1)            | 11.2% (8.1-14.6)            | 11.5% (8.2-15.1)                              | 12.3% (8.9-16.1)                        | 11.4% (8.2-15.0)                                        |
| Romania                               | 7.5% (2.3-13.6)      | 6.6% (2.0-12.1)           | 11.6% (3.4-21.5)           | 8.1% (2.6-14.4)             | 7.0% (2.0-12.9)             | 7.2% (2.1-13.2)                               | 9.3% (2.7-16.5)                         | 7.5% (2.3-13.6)                                         |
| Russian Federation                    | 2.7% (1.4-4.2)       | 2.4% (1.3-3.9)            | 4.2% (2.2-7.0)             | 2.9% (1.5-4.6)              | 2.5% (1.3-4.0)              | 2.7% (1.4-4.2)                                | 3.1% (1.4-5.2)                          | 2.7% (1.4-4.3)                                          |
| Slovakia*                             | 4.7% (2.9-7.1)       | 4.7% (2.8-7.5)            | 7.4% (4.4-11.6)            | 4.9% (3.0-7.4)              | 4.5% (2.7-7.0)              | 4.8% (2.9-7.4)                                | 5.1% (3.1-7.8)                          | 4.7% (2.9-7.1)                                          |
| Ukraine                               | 0.3% (0.2-0.6)       | 0.3% (0.2-0.6)            | 0.5% (0.3-1.0)             | 0.4% (-0.2-1.3)             | 0.3% (-0.3-0.9)             | 0.3% (0.2-0.6)                                | 0.3% (-0.6-1.5)                         | 0.3% (0.2-0.6)                                          |
| <b>Latin America</b>                  |                      |                           |                            |                             |                             |                                               |                                         |                                                         |
| Argentina*                            | 12.1% (7.8-16.9)     | 12.3% (8.1-17.0)          | 12.1% (7.8-16.9)           | 12.2% (7.8-17.1)            | 12.0% (8.0-16.7)            | 12.3% (8.0-17.3)                              | 12.9% (8.4-18.1)                        | 12.1% (7.9-17.1)                                        |
| Belize*                               | 11.6% (7.6-16.3)     | 11.3% (7.4-16.0)          | 11.6% (7.6-16.3)           | 11.8% (7.6-16.7)            | 11.4% (7.4-16.1)            | 11.7% (7.5-16.5)                              | 12.6% (8.1-17.7)                        | 11.6% (7.6-16.5)                                        |
| Bolivia*                              | 11.4% (7.7-16.3)     | 11.2% (7.5-15.9)          | 11.4% (7.7-16.3)           | 11.7% (7.8-16.5)            | 11.3% (7.6-16.0)            | 11.5% (7.8-16.4)                              | 12.5% (8.2-17.6)                        | 11.4% (7.6-16.4)                                        |
| Brazil*                               | 11.4% (7.6-16.0)     | 11.0% (7.4-15.5)          | 11.4% (7.6-16.0)           | 11.7% (7.7-16.3)            | 11.2% (7.6-15.7)            | 11.4% (7.7-16.1)                              | 12.4% (8.3-17.3)                        | 11.4% (7.7-16.0)                                        |
| Chile*                                | 11.5% (7.6-16.3)     | 11.2% (7.4-15.9)          | 11.5% (7.6-16.3)           | 11.7% (7.7-16.6)            | 11.3% (7.5-16.1)            | 11.6% (7.7-16.4)                              | 12.5% (8.0-17.5)                        | 11.5% (7.6-16.3)                                        |
| Colombia*                             | 20.9% (13.3-30.9)    | 21.9% (15.1-29.1)         | 20.9% (13.3-30.9)          | 20.9% (13.0-31.1)           | 20.5% (13.2-29.8)           | 22.9% (14.4-34.0)                             | 21.3% (13.6-31.4)                       | 20.8% (13.3-30.7)                                       |
| Costa Rica*                           | 11.6% (7.5-16.0)     | 11.3% (7.5-15.7)          | 11.6% (7.5-16.0)           | 11.8% (7.7-16.3)            | 11.4% (7.5-15.8)            | 11.7% (7.6-16.1)                              | 12.6% (8.0-17.4)                        | 11.6% (7.6-16.1)                                        |
| Ecuador*                              | 11.5% (7.5-15.8)     | 11.2% (7.3-15.6)          | 11.5% (7.5-15.8)           | 11.7% (7.5-16.1)            | 11.3% (7.5-15.6)            | 11.5% (7.5-15.9)                              | 12.4% (8.3-17.4)                        | 11.5% (7.6-16.0)                                        |
| El Salvador*                          | 11.5% (7.6-16.5)     | 11.2% (7.3-15.9)          | 11.5% (7.6-16.5)           | 11.7% (7.7-16.8)            | 11.4% (7.5-16.3)            | 11.5% (7.6-16.7)                              | 12.6% (8.3-17.8)                        | 11.5% (7.6-16.4)                                        |
| Guatemala*                            | 11.5% (7.6-16.2)     | 11.2% (7.4-15.6)          | 11.5% (7.6-16.2)           | 11.7% (7.8-16.4)            | 11.3% (7.6-15.9)            | 11.6% (7.8-16.3)                              | 12.5% (8.2-17.5)                        | 11.6% (7.7-16.2)                                        |
| Guyana*                               | 11.4% (7.4-16.1)     | 11.1% (7.3-15.6)          | 11.4% (7.4-16.1)           | 11.6% (7.6-16.3)            | 11.2% (7.3-15.8)            | 11.4% (7.4-16.2)                              | 12.4% (8.1-17.4)                        | 11.4% (7.5-16.2)                                        |
| Honduras*                             | 11.4% (7.8-16.1)     | 11.1% (7.6-15.7)          | 11.4% (7.8-16.1)           | 11.6% (7.9-16.3)            | 11.2% (7.7-15.9)            | 11.4% (7.7-16.2)                              | 12.4% (8.3-17.5)                        | 11.4% (7.8-16.1)                                        |
| Mexico                                | 7.8% (5.0-11.5)      | 6.8% (4.3-10.1)           | 7.8% (5.0-11.5)            | 8.3% (5.4-12.0)             | 7.3% (4.6-10.9)             | 7.3% (4.5-11.0)                               | 10.3% (6.3-14.6)                        | 7.8% (4.9-11.4)                                         |
| Nicaragua*                            | 12.0% (8.1-17.4)     | 11.1% (7.4-16.1)          | 12.0% (8.1-17.4)           | 12.6% (8.5-18.0)            | 11.4% (7.6-16.6)            | 12.2% (8.1-17.5)                              | 13.3% (8.9-19.1)                        | 12.1% (8.1-17.4)                                        |
| Panama*                               | 11.4% (7.6-16.1)     | 11.1% (7.4-15.5)          | 11.4% (7.6-16.1)           | 11.6% (7.7-16.5)            | 11.3% (7.5-15.8)            | 11.5% (7.6-16.1)                              | 12.4% (8.3-17.4)                        | 11.4% (7.6-16.1)                                        |
| Paraguay*                             | 14.0% (9.3-19.8)     | 26.0% (19.3-32.8)         | 14.0% (9.3-19.8)           | 13.8% (9.1-19.6)            | 14.3% (9.5-20.1)            | 14.6% (9.7-20.6)                              | 14.0% (9.4-19.8)                        | 14.1% (9.3-19.9)                                        |
| Peru*                                 | 11.5% (7.6-16.0)     | 11.2% (7.5-15.8)          | 11.5% (7.6-16.0)           | 11.6% (7.7-16.5)            | 11.3% (7.6-15.8)            | 11.5% (7.7-16.3)                              | 12.5% (8.3-17.5)                        | 11.4% (7.7-16.1)                                        |
| Suriname*                             | 11.5% (7.7-16.0)     | 11.3% (7.4-15.8)          | 11.5% (7.7-16.0)           | 11.7% (7.8-16.1)            | 11.4% (7.5-15.9)            | 11.6% (7.7-16.3)                              | 12.5% (8.2-17.3)                        | 11.6% (7.6-16.1)                                        |
| Uruguay*                              | 13.6% (9.0-19.8)     | 19.4% (13.7-26.3)         | 13.6% (9.0-19.8)           | 13.5% (9.2-19.4)            | 13.8% (9.2-20.0)            | 14.1% (9.4-20.6)                              | 13.7% (9.2-19.8)                        | 13.6% (9.1-19.9)                                        |
| Venezuela*                            | 11.5% (7.6-16.4)     | 11.2% (7.3-15.9)          | 11.5% (7.6-16.4)           | 11.7% (7.6-16.6)            | 11.3% (7.4-16.2)            | 11.6% (7.5-16.5)                              | 12.5% (8.3-17.6)                        | 11.5% (7.5-16.5)                                        |
| <b>Middle East &amp; North Africa</b> |                      |                           |                            |                             |                             |                                               |                                         |                                                         |
| Algeria*                              | 7.0% (3.8-11.1)      | 7.3% (4.1-11.5)           | 7.0% (3.8-11.1)            | 7.1% (3.9-11.3)             | 6.9% (3.7-10.8)             | 7.2% (4.0-11.6)                               | 7.4% (3.9-11.7)                         | 7.0% (3.8-11.1)                                         |
| Bahrain*                              | 6.9% (3.7-10.9)      | 7.4% (4.0-11.5)           | 6.9% (3.7-10.9)            | 7.1% (3.7-11.2)             | 6.8% (3.7-10.6)             | 7.2% (3.8-11.3)                               | 7.3% (3.9-11.6)                         | 6.9% (3.6-10.9)                                         |

|                               | <b>Main Analyses</b> | <b>Assortative Mixing</b> | <b>Higher RR in Europe</b> | <b>Decreasing incidence</b> | <b>Increasing incidence</b> | <b>All PWID start injecting stably housed</b> | <b>Treat 10% infected PWID per year</b> | <b>Unstably housed PWID have higher mortality rates</b> |
|-------------------------------|----------------------|---------------------------|----------------------------|-----------------------------|-----------------------------|-----------------------------------------------|-----------------------------------------|---------------------------------------------------------|
| Cyprus*                       | 7.0% (3.8-11.1)      | 7.2% (4.0-11.2)           | 7.0% (3.8-11.1)            | 7.1% (3.9-11.4)             | 6.8% (3.6-10.8)             | 7.2% (3.8-11.5)                               | 7.5% (4.0-11.9)                         | 7.0% (3.8-11.1)                                         |
| Egypt*                        | 6.9% (3.8-11.1)      | 7.2% (3.9-11.7)           | 6.9% (3.8-11.1)            | 7.1% (3.8-11.3)             | 6.8% (3.7-10.8)             | 7.2% (3.9-11.5)                               | 7.5% (4.1-11.5)                         | 6.9% (3.8-11.0)                                         |
| Iraq*                         | 7.1% (4.0-11.2)      | 7.4% (4.2-11.9)           | 7.1% (4.0-11.2)            | 7.2% (3.9-11.5)             | 6.9% (3.8-11.1)             | 7.3% (4.1-11.7)                               | 7.5% (4.1-11.9)                         | 7.0% (3.9-11.2)                                         |
| Israel                        | 6.1% (3.7-9.5)       | 6.8% (4.1-10.3)           | 6.1% (3.7-9.5)             | 6.2% (3.7-9.7)              | 6.1% (3.6-9.4)              | 6.3% (3.8-9.8)                                | 6.4% (3.8-10.1)                         | 6.1% (3.7-9.5)                                          |
| Jordan*                       | 7.0% (3.7-10.9)      | 7.4% (4.0-11.7)           | 7.0% (3.7-10.9)            | 7.2% (3.8-11.1)             | 6.9% (3.7-10.8)             | 7.3% (3.9-11.4)                               | 7.4% (3.9-11.6)                         | 7.0% (3.7-10.9)                                         |
| Kuwait*                       | 6.9% (3.8-11.0)      | 7.3% (4.1-11.5)           | 6.9% (3.8-11.0)            | 7.1% (3.8-11.2)             | 6.8% (3.8-10.9)             | 7.1% (3.9-11.5)                               | 7.4% (4.0-11.8)                         | 6.9% (3.8-11.1)                                         |
| Lebanon*                      | 8.3% (4.8-13.1)      | 12.3% (7.1-19.0)          | 8.3% (4.8-13.1)            | 8.2% (4.5-13.1)             | 8.4% (4.7-13.5)             | 8.8% (5.0-14.3)                               | 8.4% (4.8-13.4)                         | 8.3% (4.7-13.3)                                         |
| Libyan Arab Jamahiriya*       | 3.4% (1.7-5.7)       | 2.9% (1.5-4.9)            | 3.4% (1.7-5.7)             | 3.7% (1.9-6.3)              | 3.0% (1.5-5.2)              | 3.0% (1.5-5.3)                                | 4.6% (2.0-7.7)                          | 3.4% (1.8-5.6)                                          |
| Morocco                       | 7.7% (3.7-12.5)      | 7.8% (3.6-13.3)           | 7.7% (3.7-12.5)            | 7.9% (3.7-12.9)             | 7.5% (3.6-12.5)             | 7.8% (3.8-13.2)                               | 8.3% (3.9-13.4)                         | 7.7% (3.8-12.7)                                         |
| Occ. Palestinian Territories* | 7.0% (3.8-11.0)      | 8.0% (4.4-12.8)           | 7.0% (3.8-11.0)            | 7.1% (3.7-11.2)             | 7.0% (3.7-11.1)             | 7.3% (3.9-11.4)                               | 7.3% (3.9-11.4)                         | 7.0% (3.8-11.1)                                         |
| Oman*                         | 6.8% (3.8-11.1)      | 7.2% (4.1-11.9)           | 6.8% (3.8-11.1)            | 7.1% (3.9-11.3)             | 6.7% (3.7-10.8)             | 7.0% (3.9-11.6)                               | 7.2% (4.0-11.7)                         | 6.9% (3.8-11.1)                                         |
| Qatar*                        | 6.9% (3.6-11.0)      | 7.4% (3.9-11.6)           | 6.9% (3.6-11.0)            | 7.0% (3.6-11.2)             | 6.8% (3.6-10.9)             | 7.1% (3.8-11.6)                               | 7.4% (3.9-11.8)                         | 6.9% (3.6-11.1)                                         |
| Saudi Arabia*                 | 4.9% (2.8-7.8)       | 4.4% (2.5-7.0)            | 4.9% (2.8-7.8)             | 5.3% (3.0-8.4)              | 4.6% (2.5-7.3)              | 4.8% (2.7-7.7)                                | 5.9% (3.0-9.3)                          | 4.9% (2.8-7.8)                                          |
| South Sudan*                  | 6.9% (3.8-11.2)      | 7.3% (4.0-11.6)           | 6.9% (3.8-11.2)            | 7.0% (4.1-11.5)             | 6.8% (3.6-10.9)             | 7.1% (3.9-11.5)                               | 7.3% (3.9-11.8)                         | 6.9% (3.8-11.2)                                         |
| Sudan*                        | 6.8% (3.7-11.1)      | 7.3% (4.0-12.1)           | 6.8% (3.7-11.1)            | 7.0% (3.6-11.3)             | 6.8% (3.7-11.0)             | 7.2% (3.9-11.6)                               | 7.4% (3.9-11.9)                         | 6.9% (3.7-11.3)                                         |
| Syrian Arab Rep.*             | 9.0% (5.0-14.5)      | 28.4% (20.3-36.9)         | 9.0% (5.0-14.5)            | 8.8% (4.6-14.2)             | 9.3% (5.0-15.4)             | 9.8% (5.4-16.1)                               | 9.0% (5.0-14.5)                         | 9.0% (4.9-14.7)                                         |
| Tunisia                       | 4.4% (2.7-6.5)       | 6.1% (3.9-8.9)            | 4.4% (2.7-6.5)             | 4.5% (2.4-6.8)              | 4.4% (2.5-6.6)              | 4.6% (2.9-7.1)                                | 4.4% (2.8-6.7)                          | 4.3% (2.7-6.5)                                          |
| Turkey*                       | 8.3% (4.5-13.4)      | 8.3% (4.7-13.2)           | 8.3% (4.5-13.4)            | 8.7% (4.6-14.3)             | 7.8% (4.2-12.6)             | 8.9% (4.7-14.6)                               | 8.8% (4.7-14.1)                         | 8.3% (4.5-13.3)                                         |
| United Arab Emirates*         | 7.0% (3.8-10.9)      | 7.3% (4.0-11.6)           | 7.0% (3.8-10.9)            | 7.2% (3.8-11.3)             | 6.8% (3.7-10.9)             | 7.2% (4.0-11.4)                               | 7.4% (4.0-11.7)                         | 6.9% (3.8-11.0)                                         |
| Yemen*                        | 6.9% (3.6-11.2)      | 7.2% (3.9-11.9)           | 6.9% (3.6-11.2)            | 7.0% (3.6-11.4)             | 6.7% (3.6-11.1)             | 7.1% (3.8-11.6)                               | 7.3% (3.9-11.8)                         | 6.9% (3.7-11.2)                                         |
| <b>North America</b>          |                      |                           |                            |                             |                             |                                               |                                         |                                                         |
| Canada                        | 21.6% (15.4-28.8)    | 20.2% (14.3-27.0)         | 21.6% (15.4-28.8)          | 21.8% (15.5-29.2)           | 21.2% (15.0-28.4)           | 21.6% (15.6-28.9)                             | 23.4% (16.9-31.0)                       | 21.6% (15.4-29.1)                                       |
| United States                 | 27.0% (20.1-34.3)    | 26.0% (19.5-33.0)         | 27.0% (20.1-34.3)          | 27.0% (20.0-34.4)           | 26.8% (20.2-34.3)           | 27.1% (20.4-34.7)                             | 28.4% (21.3-35.8)                       | 27.3% (20.5-34.7)                                       |
| <b>South Asia</b>             |                      |                           |                            |                             |                             |                                               |                                         |                                                         |
| Afghanistan                   | 26.0% (17.9-36.3)    | 23.5% (16.8-31.5)         | 26.0% (17.9-36.3)          | 26.8% (18.6-38.0)           | 24.9% (17.1-34.2)           | 28.1% (19.1-40.1)                             | 26.8% (18.5-37.1)                       | 26.1% (17.8-36.6)                                       |
| Bangladesh                    | 12.4% (5.7-20.6)     | 14.1% (7.0-22.8)          | 12.4% (5.7-20.6)           | 12.4% (5.7-20.4)            | 12.3% (5.7-20.3)            | 13.3% (6.0-22.0)                              | 12.8% (5.9-21.1)                        | 12.4% (5.7-20.5)                                        |
| Bhutan*                       | 21.3% (13.8-30.3)    | 21.3% (13.7-30.0)         | 21.3% (13.8-30.3)          | 21.3% (13.9-30.1)           | 21.0% (13.5-30.4)           | 22.3% (14.3-32.0)                             | 22.1% (14.8-30.9)                       | 21.4% (14.0-30.7)                                       |
| India                         | 28.2% (18.5-38.8)    | 26.9% (18.7-34.9)         | 28.2% (18.5-38.8)          | 28.2% (18.7-38.6)           | 28.2% (18.4-38.5)           | 29.1% (19.3-40.0)                             | 29.1% (19.2-39.9)                       | 28.7% (18.8-39.2)                                       |
| Iran                          | 21.8% (15.3-29.7)    | 21.6% (15.0-29.2)         | 21.8% (15.3-29.7)          | 21.9% (15.3-29.7)           | 21.7% (15.1-29.6)           | 22.5% (15.6-30.6)                             | 22.8% (16.0-30.8)                       | 22.1% (15.5-30.3)                                       |
| Maldives*                     | 32.6% (22.3-46.1)    | 38.7% (30.9-45.4)         | 32.6% (22.3-46.1)          | 30.4% (20.9-42.4)           | 34.7% (23.6-49.6)           | 35.7% (23.9-51.7)                             | 32.6% (22.3-46.1)                       | 32.8% (22.5-46.0)                                       |
| Nepal                         | 1.1% (0.5-2.0)       | 1.2% (0.5-2.2)            | 1.1% (0.5-2.0)             | 1.3% (0.1-2.5)              | 1.0% (-0.0-2.0)             | 1.2% (0.5-2.1)                                | 1.1% (0.3-2.1)                          | 1.1% (0.5-1.9)                                          |
| Pakistan                      | 18.8% (11.5-28.3)    | 19.6% (10.4-33.6)         | 18.8% (11.5-28.3)          | 19.0% (12.1-27.9)           | 18.6% (10.8-29.2)           | 19.9% (11.6-31.1)                             | 19.6% (12.7-28.7)                       | 18.9% (11.6-28.5)                                       |
| Sri Lanka*                    | 2.0% (1.0-3.7)       | 2.5% (1.1-5.2)            | 2.0% (1.0-3.7)             | 2.1% (0.7-4.0)              | 2.0% (0.7-3.8)              | 2.1% (1.0-3.9)                                | 2.1% (0.8-3.9)                          | 2.0% (0.9-3.7)                                          |
| <b>Sub Saharan Africa</b>     |                      |                           |                            |                             |                             |                                               |                                         |                                                         |
| Angola*                       | 24.3% (13.8-36.1)    | 26.8% (17.9-35.5)         | 24.3% (13.8-36.1)          | 23.7% (13.6-35.2)           | 24.7% (13.7-36.7)           | 26.2% (15.0-39.3)                             | 24.6% (14.0-36.4)                       | 24.4% (14.0-36.3)                                       |
| Benin*                        | 19.3% (10.9-28.4)    | 24.3% (15.8-32.4)         | 19.3% (10.9-28.4)          | 18.9% (10.7-27.8)           | 19.6% (11.1-28.7)           | 20.1% (11.4-29.2)                             | 19.4% (11.1-28.6)                       | 19.6% (11.2-28.3)                                       |
| Botswana*                     | 24.5% (14.6-35.1)    | 27.1% (18.3-35.3)         | 24.5% (14.6-35.1)          | 23.9% (14.2-34.3)           | 25.0% (14.4-35.8)           | 26.2% (15.7-38.2)                             | 24.8% (14.8-35.5)                       | 24.7% (14.6-35.7)                                       |
| Burkina Faso*                 | 24.7% (14.3-36.2)    | 27.1% (18.2-35.5)         | 24.7% (14.3-36.2)          | 24.1% (13.7-35.3)           | 25.2% (14.4-37.1)           | 26.6% (15.4-39.4)                             | 25.0% (14.5-36.5)                       | 25.0% (14.4-36.6)                                       |
| Burundi*                      | 24.6% (13.9-36.8)    | 27.2% (18.2-35.7)         | 24.6% (13.9-36.8)          | 24.0% (13.8-36.2)           | 25.0% (14.2-37.4)           | 26.5% (15.0-39.8)                             | 24.9% (14.1-37.1)                       | 24.8% (14.1-37.3)                                       |
| Cameroon*                     | 24.1% (14.4-37.3)    | 26.7% (18.3-35.9)         | 24.1% (14.4-37.3)          | 23.5% (13.9-36.2)           | 24.5% (14.7-37.6)           | 26.2% (15.5-40.3)                             | 24.5% (14.6-37.6)                       | 24.2% (14.5-37.4)                                       |
| Cape Verde*                   | 24.3% (13.9-37.0)    | 27.1% (18.0-35.9)         | 24.3% (13.9-37.0)          | 23.8% (13.4-36.5)           | 24.7% (14.4-38.0)           | 26.2% (15.2-40.4)                             | 24.6% (14.2-37.4)                       | 24.6% (14.1-38.0)                                       |
| Central African Republic*     | 24.3% (14.2-37.1)    | 26.9% (18.2-35.7)         | 24.3% (14.2-37.1)          | 23.7% (13.7-36.3)           | 24.9% (14.3-37.6)           | 26.2% (15.5-39.4)                             | 24.6% (14.3-37.5)                       | 24.5% (14.1-37.2)                                       |
| Chad*                         | 24.4% (14.3-37.0)    | 27.0% (18.3-36.0)         | 24.4% (14.3-37.0)          | 23.9% (14.0-36.1)           | 24.9% (14.4-37.6)           | 26.3% (15.3-39.7)                             | 24.7% (14.5-37.3)                       | 24.7% (14.3-37.5)                                       |

|                         | <b>Main Analyses</b> | <b>Assortative Mixing</b> | <b>Higher RR in Europe</b> | <b>Decreasing incidence</b> | <b>Increasing incidence</b> | <b>All PWID start injecting stably housed</b> | <b>Treat 10% infected PWID per year</b> | <b>Unstably housed PWID have higher mortality rates</b> |
|-------------------------|----------------------|---------------------------|----------------------------|-----------------------------|-----------------------------|-----------------------------------------------|-----------------------------------------|---------------------------------------------------------|
| Comoros*                | 24.4% (14.3-37.1)    | 27.0% (18.2-36.1)         | 24.4% (14.3-37.1)          | 23.7% (13.7-36.2)           | 24.9% (14.6-37.7)           | 26.2% (15.6-39.6)                             | 24.7% (14.6-37.5)                       | 24.6% (14.4-37.4)                                       |
| Congo (Kinshasa)*       | 24.7% (14.4-35.9)    | 27.3% (18.2-35.2)         | 24.7% (14.4-35.9)          | 24.1% (13.9-35.1)           | 25.1% (14.6-36.4)           | 26.6% (15.5-39.3)                             | 24.9% (14.6-36.2)                       | 24.9% (14.6-36.5)                                       |
| Cote d'Ivoire           | 14.4% (6.8-25.5)     | 32.9% (22.7-42.4)         | 14.4% (6.8-25.5)           | 13.7% (6.1-23.9)            | 15.2% (7.0-27.1)            | 16.3% (7.5-28.9)                              | 14.5% (6.8-25.5)                        | 14.5% (6.9-25.9)                                        |
| Djibouti*               | 24.4% (14.5-36.3)    | 27.1% (18.0-35.6)         | 24.4% (14.5-36.3)          | 23.9% (13.8-35.8)           | 24.8% (14.5-36.7)           | 26.3% (15.6-39.2)                             | 24.7% (14.6-36.6)                       | 24.6% (14.4-36.8)                                       |
| Equatorial Guinea*      | 24.6% (14.5-37.0)    | 27.2% (18.3-36.0)         | 24.6% (14.5-37.0)          | 24.1% (14.1-35.8)           | 25.0% (14.6-37.6)           | 26.4% (16.0-40.1)                             | 24.9% (14.8-37.5)                       | 24.8% (14.5-37.4)                                       |
| Eritrea*                | 24.4% (14.3-37.0)    | 26.9% (18.3-35.7)         | 24.4% (14.3-37.0)          | 23.8% (14.1-36.1)           | 24.8% (14.7-37.3)           | 26.3% (15.4-40.0)                             | 24.7% (14.5-37.3)                       | 24.5% (14.7-36.8)                                       |
| Ethiopia*               | 24.2% (14.0-37.0)    | 26.8% (17.8-35.5)         | 24.2% (14.0-37.0)          | 23.7% (13.6-36.2)           | 24.6% (14.0-37.4)           | 26.0% (15.4-39.6)                             | 24.5% (14.2-37.3)                       | 24.5% (14.1-37.2)                                       |
| Gabon*                  | 24.5% (14.0-36.2)    | 27.1% (18.0-35.3)         | 24.5% (14.0-36.2)          | 23.9% (13.9-35.5)           | 24.9% (14.2-36.9)           | 26.4% (15.1-39.2)                             | 24.8% (14.2-36.6)                       | 24.8% (14.2-36.6)                                       |
| Gambia*                 | 24.5% (14.2-36.3)    | 27.2% (18.2-35.4)         | 24.5% (14.2-36.3)          | 24.0% (13.9-35.1)           | 25.0% (14.3-36.9)           | 26.6% (15.3-39.6)                             | 24.8% (14.4-36.6)                       | 24.8% (14.3-36.7)                                       |
| Ghana*                  | 18.3% (10.5-27.7)    | 19.2% (11.7-27.2)         | 18.3% (10.5-27.7)          | 18.3% (10.4-27.6)           | 18.2% (10.5-27.5)           | 18.9% (10.9-28.5)                             | 18.9% (10.8-28.4)                       | 18.5% (10.4-28.2)                                       |
| Guinea*                 | 24.3% (14.5-36.3)    | 26.8% (18.4-35.7)         | 24.3% (14.5-36.3)          | 23.7% (14.1-35.9)           | 24.6% (14.7-36.7)           | 26.0% (15.7-39.1)                             | 24.6% (14.7-36.7)                       | 24.5% (14.5-36.8)                                       |
| Guinea-Bissau*          | 24.5% (14.4-36.1)    | 27.1% (18.2-35.3)         | 24.5% (14.4-36.1)          | 23.9% (14.0-35.4)           | 24.9% (14.3-36.6)           | 26.3% (15.8-38.9)                             | 24.8% (14.6-36.4)                       | 24.8% (14.6-36.5)                                       |
| Kenya                   | 23.4% (17.1-31.8)    | 28.5% (21.6-35.9)         | 23.4% (17.1-31.8)          | 22.7% (16.4-31.1)           | 24.1% (17.5-32.7)           | 25.2% (17.9-35.1)                             | 23.6% (17.2-32.0)                       | 23.7% (17.2-31.8)                                       |
| Lesotho*                | 24.2% (13.6-36.9)    | 27.0% (17.6-35.4)         | 24.2% (13.6-36.9)          | 23.8% (13.0-36.0)           | 24.7% (13.8-37.2)           | 26.2% (14.8-39.8)                             | 24.5% (13.8-37.2)                       | 24.5% (13.6-37.1)                                       |
| Liberia*                | 24.4% (14.5-35.5)    | 26.9% (18.4-35.5)         | 24.4% (14.5-35.5)          | 23.8% (14.1-34.8)           | 24.9% (14.7-36.1)           | 26.3% (15.6-38.5)                             | 24.7% (14.6-36.0)                       | 24.5% (14.7-35.7)                                       |
| Madagascar*             | 26.7% (15.5-40.2)    | 35.2% (27.2-42.9)         | 26.7% (15.5-40.2)          | 25.5% (14.9-38.1)           | 28.0% (16.4-42.3)           | 29.2% (17.1-43.8)                             | 26.7% (15.5-40.3)                       | 26.9% (15.4-40.4)                                       |
| Malawi*                 | 24.3% (14.1-37.4)    | 27.1% (18.2-36.1)         | 24.3% (14.1-37.4)          | 23.8% (13.9-36.7)           | 24.8% (14.3-38.0)           | 26.2% (15.5-40.0)                             | 24.6% (14.3-37.8)                       | 24.6% (14.2-37.7)                                       |
| Mali*                   | 24.8% (14.7-36.1)    | 27.3% (18.7-35.3)         | 24.8% (14.7-36.1)          | 24.2% (14.1-35.2)           | 25.4% (15.1-36.5)           | 26.7% (15.8-38.9)                             | 25.1% (14.9-36.4)                       | 25.2% (14.7-36.5)                                       |
| Mauritania*             | 24.2% (14.5-36.3)    | 26.6% (18.5-35.4)         | 24.2% (14.5-36.3)          | 23.6% (14.2-36.0)           | 24.5% (14.5-36.4)           | 26.0% (15.6-39.8)                             | 24.4% (14.7-36.6)                       | 24.3% (14.4-36.6)                                       |
| Mauritius*              | 9.4% (4.8-14.7)      | 8.2% (4.1-12.9)           | 9.4% (4.8-14.7)            | 10.2% (5.3-15.7)            | 8.6% (4.4-13.7)             | 8.5% (4.2-14.0)                               | 12.5% (6.5-19.1)                        | 9.3% (4.8-14.5)                                         |
| Mozambique*             | 15.0% (8.6-23.3)     | 13.2% (7.6-20.0)          | 15.0% (8.6-23.3)           | 16.2% (9.2-24.9)            | 13.9% (7.8-21.7)            | 14.9% (8.5-23.0)                              | 16.8% (9.6-25.5)                        | 15.0% (8.6-23.2)                                        |
| Namibia*                | 24.4% (14.8-36.9)    | 26.9% (18.7-35.9)         | 24.4% (14.8-36.9)          | 23.8% (14.2-36.2)           | 24.7% (14.8-37.9)           | 26.3% (15.8-39.7)                             | 24.6% (15.0-37.3)                       | 24.5% (14.8-37.6)                                       |
| Niger*                  | 24.5% (14.2-36.6)    | 27.1% (18.1-35.5)         | 24.5% (14.2-36.6)          | 24.0% (13.9-35.8)           | 24.8% (14.6-37.3)           | 26.3% (15.4-39.6)                             | 24.7% (14.5-36.9)                       | 24.6% (14.4-37.0)                                       |
| Nigeria*                | 22.5% (13.3-33.6)    | 33.6% (25.5-41.1)         | 22.5% (13.3-33.6)          | 21.7% (12.8-32.1)           | 23.3% (13.7-35.0)           | 23.9% (14.1-35.8)                             | 22.5% (13.3-33.6)                       | 22.8% (13.6-34.3)                                       |
| Rep. of the Congo*      | 24.3% (14.1-36.6)    | 27.0% (18.3-35.4)         | 24.3% (14.1-36.6)          | 23.8% (13.6-36.0)           | 24.7% (14.5-37.2)           | 26.4% (15.3-39.9)                             | 24.7% (14.3-36.9)                       | 24.5% (14.2-36.8)                                       |
| Rwanda*                 | 24.3% (13.7-36.0)    | 26.9% (18.1-35.5)         | 24.3% (13.7-36.0)          | 23.8% (13.5-34.9)           | 24.7% (13.9-37.0)           | 26.2% (15.0-38.9)                             | 24.5% (14.0-36.4)                       | 24.5% (13.9-36.6)                                       |
| Sao Tome & Principe*    | 24.6% (14.5-37.2)    | 27.2% (18.5-35.7)         | 24.6% (14.5-37.2)          | 24.0% (14.2-36.2)           | 25.0% (14.7-37.5)           | 26.4% (15.6-40.3)                             | 24.9% (14.7-37.6)                       | 24.8% (14.7-37.2)                                       |
| Senegal*                | 21.1% (11.5-31.8)    | 20.7% (12.1-29.4)         | 21.1% (11.5-31.8)          | 21.4% (11.6-31.9)           | 20.8% (11.2-31.1)           | 22.4% (12.2-33.6)                             | 22.0% (12.1-32.9)                       | 21.3% (11.5-32.0)                                       |
| Seychelles*             | 20.8% (12.1-31.9)    | 20.0% (12.4-28.6)         | 20.8% (12.1-31.9)          | 20.9% (12.1-32.1)           | 20.3% (11.7-31.2)           | 21.9% (12.7-33.0)                             | 21.6% (12.5-32.9)                       | 20.8% (12.0-32.0)                                       |
| Sierra Leone*           | 24.8% (14.3-35.9)    | 27.5% (18.6-35.0)         | 24.8% (14.3-35.9)          | 24.3% (13.8-35.6)           | 25.3% (14.3-36.3)           | 26.8% (15.7-38.9)                             | 25.0% (14.6-36.2)                       | 25.2% (14.3-36.4)                                       |
| Somalia*                | 24.5% (14.0-36.5)    | 27.1% (17.8-35.6)         | 24.5% (14.0-36.5)          | 24.0% (13.6-35.6)           | 24.8% (14.5-37.0)           | 26.3% (15.2-39.4)                             | 24.7% (14.3-36.9)                       | 24.6% (14.1-36.9)                                       |
| South Africa*           | 33.1% (21.7-46.1)    | 31.8% (23.4-39.8)         | 33.1% (21.7-46.1)          | 32.2% (21.2-45.1)           | 33.7% (22.1-46.9)           | 34.9% (23.0-48.4)                             | 33.4% (21.9-46.4)                       | 33.6% (21.9-46.3)                                       |
| Swaziland*              | 24.5% (13.9-37.4)    | 27.2% (18.1-36.2)         | 24.5% (13.9-37.4)          | 23.8% (13.7-36.2)           | 24.9% (14.2-37.3)           | 26.3% (15.3-39.7)                             | 24.7% (14.1-37.7)                       | 24.7% (14.1-37.1)                                       |
| Togo*                   | 14.1% (9.0-20.7)     | 18.8% (13.0-25.6)         | 14.1% (9.0-20.7)           | 13.8% (8.8-20.2)            | 14.2% (9.2-21.0)            | 15.6% (9.7-22.9)                              | 14.2% (9.1-21.0)                        | 14.1% (9.2-20.7)                                        |
| Uganda*                 | 24.4% (14.5-36.2)    | 27.0% (18.2-35.4)         | 24.4% (14.5-36.2)          | 23.9% (13.9-35.1)           | 24.9% (14.5-36.8)           | 26.2% (15.3-39.1)                             | 24.7% (14.6-36.5)                       | 24.6% (14.6-36.3)                                       |
| United Rep. of Tanzania | 21.8% (12.1-34.0)    | 23.2% (14.4-32.5)         | 21.8% (12.1-34.0)          | 21.5% (12.1-33.4)           | 21.7% (12.2-33.8)           | 23.5% (13.1-36.4)                             | 22.1% (12.3-34.4)                       | 21.9% (12.0-34.2)                                       |
| Zambia*                 | 24.6% (14.4-36.3)    | 27.0% (18.3-35.6)         | 24.6% (14.4-36.3)          | 24.1% (14.0-35.4)           | 25.0% (14.8-36.7)           | 26.5% (15.3-38.8)                             | 25.0% (14.6-36.6)                       | 24.7% (14.6-36.3)                                       |
| Zimbabwe*               | 24.7% (14.5-35.5)    | 27.1% (18.6-35.2)         | 24.7% (14.5-35.5)          | 24.2% (14.3-34.6)           | 25.2% (14.7-36.0)           | 26.6% (15.8-38.4)                             | 25.0% (14.6-35.8)                       | 24.9% (14.8-36.0)                                       |
| <b>Western Europe</b>   |                      |                           |                            |                             |                             |                                               |                                         |                                                         |
| Albania                 | 18.9% (13.0-25.3)    | 21.2% (15.0-27.6)         | 27.8% (18.5-37.6)          | 18.7% (12.9-25.3)           | 19.0% (13.1-25.7)           | 19.6% (13.4-26.4)                             | 19.3% (13.3-25.8)                       | 19.0% (13.2-25.9)                                       |
| Andorra*                | 13.9% (9.4-19.1)     | 13.9% (9.5-18.9)          | 20.8% (14.0-28.9)          | 14.0% (9.7-19.2)            | 13.6% (9.3-18.9)            | 14.2% (9.5-19.4)                              | 14.8% (10.1-20.4)                       | 13.9% (9.5-19.0)                                        |
| Austria                 | 9.4% (5.8-13.7)      | 9.1% (5.7-13.4)           | 14.2% (8.9-21.5)           | 9.5% (5.9-14.0)             | 9.2% (5.7-13.4)             | 9.4% (5.9-13.8)                               | 10.2% (6.3-14.8)                        | 9.4% (5.9-13.7)                                         |
| Belgium                 | 17.7% (10.7-24.8)    | 17.2% (10.6-24.1)         | 26.1% (15.7-36.4)          | 17.9% (10.9-25.1)           | 17.5% (10.4-24.6)           | 17.8% (10.8-25.1)                             | 19.0% (11.4-26.6)                       | 17.7% (10.7-25.1)                                       |
| Croatia                 | 11.3% (6.7-16.8)     | 13.3% (8.2-19.2)          | 17.3% (10.1-25.4)          | 11.3% (6.7-16.8)            | 11.3% (6.8-16.9)            | 11.6% (6.9-17.4)                              | 11.7% (6.9-17.4)                        | 11.3% (6.8-17.0)                                        |
| Denmark                 | 17.0% (10.4-25.1)    | 18.3% (11.6-26.5)         | 25.4% (14.6-36.1)          | 16.9% (10.4-25.1)           | 17.0% (10.4-25.4)           | 17.4% (10.6-25.8)                             | 17.6% (10.8-25.9)                       | 17.2% (10.5-25.4)                                       |

|                   | <b>Main Analyses</b> | <b>Assortative Mixing</b> | <b>Higher RR in Europe</b> | <b>Decreasing incidence</b> | <b>Increasing incidence</b> | <b>All PWID start injecting stably housed</b> | <b>Treat 10% infected PWID per year</b> | <b>Unstably housed PWID have higher mortality rates</b> |
|-------------------|----------------------|---------------------------|----------------------------|-----------------------------|-----------------------------|-----------------------------------------------|-----------------------------------------|---------------------------------------------------------|
| England           | 26.0% (18.2-34.6)    | 27.4% (20.2-34.5)         | 36.8% (25.7-48.6)          | 25.7% (17.9-34.2)           | 26.3% (18.4-35.1)           | 26.8% (18.8-35.5)                             | 26.5% (18.4-35.2)                       | 26.2% (18.2-34.6)                                       |
| Finland*          | 11.4% (7.9-15.9)     | 10.4% (7.1-14.4)          | 17.2% (11.6-24.6)          | 11.8% (8.3-16.3)            | 10.9% (7.5-15.3)            | 11.2% (7.8-15.6)                              | 13.1% (8.9-18.1)                        | 11.4% (7.9-15.8)                                        |
| Form. Yug. Rep.   |                      |                           |                            |                             |                             |                                               |                                         |                                                         |
| Macedonia*        | 12.9% (8.9-17.9)     | 12.4% (8.4-17.1)          | 19.5% (13.2-27.6)          | 13.3% (9.2-18.3)            | 12.6% (8.7-17.5)            | 13.0% (9.0-18.0)                              | 14.2% (9.7-19.7)                        | 12.9% (8.9-17.9)                                        |
| France            | 6.8% (4.4-10.3)      | 6.5% (4.2-9.9)            | 10.8% (6.9-16.1)           | 7.1% (4.6-10.7)             | 6.6% (4.2-10.1)             | 6.9% (4.5-10.4)                               | 7.7% (4.8-11.5)                         | 6.8% (4.4-10.4)                                         |
| Germany           | 8.7% (6.0-12.2)      | 8.3% (5.6-11.7)           | 13.5% (8.8-19.4)           | 8.9% (6.2-12.3)             | 8.4% (5.9-12.0)             | 8.7% (6.0-12.4)                               | 9.6% (6.4-13.5)                         | 8.7% (6.0-12.2)                                         |
| Greece            | 16.4% (10.5-22.1)    | 15.3% (10.0-20.8)         | 24.0% (16.3-33.2)          | 16.8% (10.8-22.5)           | 16.0% (10.3-21.6)           | 16.4% (10.6-21.9)                             | 18.0% (11.7-24.1)                       | 16.4% (10.6-22.1)                                       |
| Greenland*        | 13.9% (9.7-19.1)     | 13.9% (9.9-18.7)          | 20.8% (14.1-29.2)          | 14.1% (9.8-19.3)            | 13.7% (9.7-18.7)            | 14.2% (9.8-19.3)                              | 14.8% (10.4-20.1)                       | 14.0% (9.8-19.0)                                        |
| Iceland           | 20.8% (15.2-27.1)    | 18.9% (13.8-24.6)         | 30.3% (22.1-39.2)          | 21.5% (15.6-28.1)           | 20.1% (14.6-26.3)           | 21.0% (15.3-27.2)                             | 22.8% (16.8-29.5)                       | 21.0% (15.2-27.2)                                       |
| Ireland           | 3.0% (1.9-4.6)       | 2.7% (1.7-4.1)            | 4.7% (2.9-7.5)             | 3.2% (2.0-4.9)              | 2.8% (1.7-4.3)              | 3.0% (1.8-4.5)                                | 3.6% (1.9-5.8)                          | 3.0% (1.9-4.5)                                          |
| Italy             | 9.6% (6.9-12.7)      | 9.3% (6.7-12.4)           | 14.7% (10.3-20.2)          | 9.9% (7.1-13.0)             | 9.4% (6.7-12.4)             | 9.8% (7.0-13.0)                               | 10.5% (7.4-13.8)                        | 9.6% (6.9-12.7)                                         |
| Liechtenstein*    | 14.0% (9.7-19.2)     | 14.0% (9.7-18.9)          | 20.9% (14.1-29.3)          | 14.2% (9.8-19.5)            | 13.7% (9.6-19.0)            | 14.2% (9.9-19.6)                              | 14.8% (10.4-20.4)                       | 14.0% (9.7-19.4)                                        |
| Luxembourg*       | 10.3% (7.2-14.7)     | 9.2% (6.4-13.2)           | 15.9% (10.4-22.8)          | 10.9% (7.5-15.3)            | 9.7% (6.8-14.1)             | 9.9% (6.9-14.3)                               | 12.3% (8.3-17.4)                        | 10.3% (7.2-14.7)                                        |
| Malta*            | 16.3% (11.2-22.5)    | 20.7% (14.3-27.8)         | 24.0% (16.8-33.9)          | 16.0% (11.2-22.0)           | 16.6% (11.3-22.7)           | 17.0% (11.5-23.4)                             | 16.5% (11.3-22.8)                       | 16.4% (11.3-22.6)                                       |
| Monaco*           | 14.0% (9.6-19.3)     | 14.0% (9.6-19.0)          | 21.1% (13.9-29.6)          | 14.2% (9.6-19.6)            | 13.8% (9.4-18.9)            | 14.3% (9.7-19.7)                              | 14.9% (10.0-20.5)                       | 14.1% (9.6-19.4)                                        |
| Montenegro*       | 16.3% (11.1-22.6)    | 16.6% (11.6-22.3)         | 24.5% (16.3-33.9)          | 16.5% (11.2-22.9)           | 16.1% (11.0-22.1)           | 17.1% (11.6-23.7)                             | 17.1% (11.7-23.5)                       | 16.4% (11.1-22.6)                                       |
| Netherlands       | 8.7% (6.0-11.6)      | 8.6% (5.9-11.7)           | 13.3% (9.1-18.8)           | 8.9% (6.0-11.9)             | 8.5% (5.8-11.4)             | 8.9% (6.1-11.9)                               | 9.3% (6.3-12.5)                         | 8.7% (5.9-11.6)                                         |
| Northern Ireland* | 13.9% (9.6-19.2)     | 13.9% (9.6-19.0)          | 20.9% (14.3-29.3)          | 14.1% (9.8-19.4)            | 13.8% (9.3-18.9)            | 14.2% (9.7-19.5)                              | 14.8% (10.1-20.4)                       | 14.0% (9.5-19.1)                                        |
| Norway            | 15.0% (9.7-20.8)     | 14.3% (9.2-19.9)          | 22.2% (14.4-31.8)          | 15.3% (10.0-21.2)           | 14.7% (9.5-20.6)            | 15.0% (9.6-21.0)                              | 16.5% (10.6-23.0)                       | 15.0% (9.6-21.0)                                        |
| Portugal*         | 9.2% (6.1-13.2)      | 8.1% (5.3-11.7)           | 14.2% (9.3-20.7)           | 9.9% (6.6-14.1)             | 8.7% (5.6-12.5)             | 8.7% (5.7-12.8)                               | 11.5% (7.8-16.1)                        | 9.2% (6.1-13.3)                                         |
| San Marino*       | 13.8% (9.4-19.4)     | 13.8% (9.4-19.1)          | 20.8% (13.9-28.7)          | 14.0% (9.3-19.5)            | 13.6% (9.2-19.1)            | 14.1% (9.5-19.9)                              | 14.8% (10.0-20.8)                       | 13.9% (9.3-19.5)                                        |
| Scotland          | 15.6% (11.2-20.4)    | 15.6% (11.3-20.5)         | 23.0% (16.2-31.1)          | 15.7% (11.2-20.5)           | 15.4% (11.0-20.4)           | 15.8% (11.4-21.2)                             | 16.5% (11.8-21.7)                       | 15.6% (11.2-20.7)                                       |
| Serbia            | 1.0% (0.4-1.8)       | 1.6% (0.6-3.0)            | 1.7% (0.5-3.3)             | 1.2% (-0.2-2.6)             | 1.0% (-0.3-2.3)             | 1.1% (0.4-2.0)                                | 1.0% (0.3-1.9)                          | 1.0% (0.4-1.9)                                          |
| Slovenia          | 6.5% (3.8-10.6)      | 8.8% (5.2-13.7)           | 10.4% (6.1-16.5)           | 6.5% (3.7-10.5)             | 6.6% (3.7-10.6)             | 6.9% (4.0-11.3)                               | 6.7% (3.9-10.8)                         | 6.5% (3.8-10.6)                                         |
| Spain             | 13.3% (8.6-19.1)     | 12.3% (7.9-17.5)          | 19.8% (12.9-28.7)          | 13.8% (9.0-19.8)            | 12.9% (8.2-18.5)            | 13.3% (8.6-19.1)                              | 15.0% (9.7-21.5)                        | 13.4% (8.6-19.1)                                        |
| Sweden            | 16.3% (10.6-23.5)    | 14.9% (9.7-21.3)          | 24.0% (15.9-33.8)          | 16.8% (11.0-24.0)           | 15.9% (10.4-22.9)           | 16.0% (10.4-22.9)                             | 18.8% (12.2-26.6)                       | 16.2% (10.7-23.2)                                       |
| Switzerland       | 7.0% (5.0-9.3)       | 6.4% (4.5-8.5)            | 10.8% (7.4-15.4)           | 7.3% (5.2-9.7)              | 6.7% (4.7-9.0)              | 6.9% (4.9-9.2)                                | 8.1% (5.7-11.1)                         | 7.0% (5.0-9.4)                                          |
| Wales             | 30.6% (22.9-38.6)    | 31.0% (23.9-37.7)         | 41.7% (31.8-52.2)          | 30.1% (22.5-37.9)           | 31.0% (23.3-39.1)           | 31.5% (23.4-39.6)                             | 31.0% (23.2-39.0)                       | 30.9% (23.0-38.6)                                       |

**Appendix Figure 5: Sensitivity analyses.** Red bars show the median global transmission PAF (tPAF) or classical PAF (cPAF) of unstable housing for HIV (top) and HCV (bottom) for each of the sensitivity analyses. The solid black lines show the median baseline tPAF.

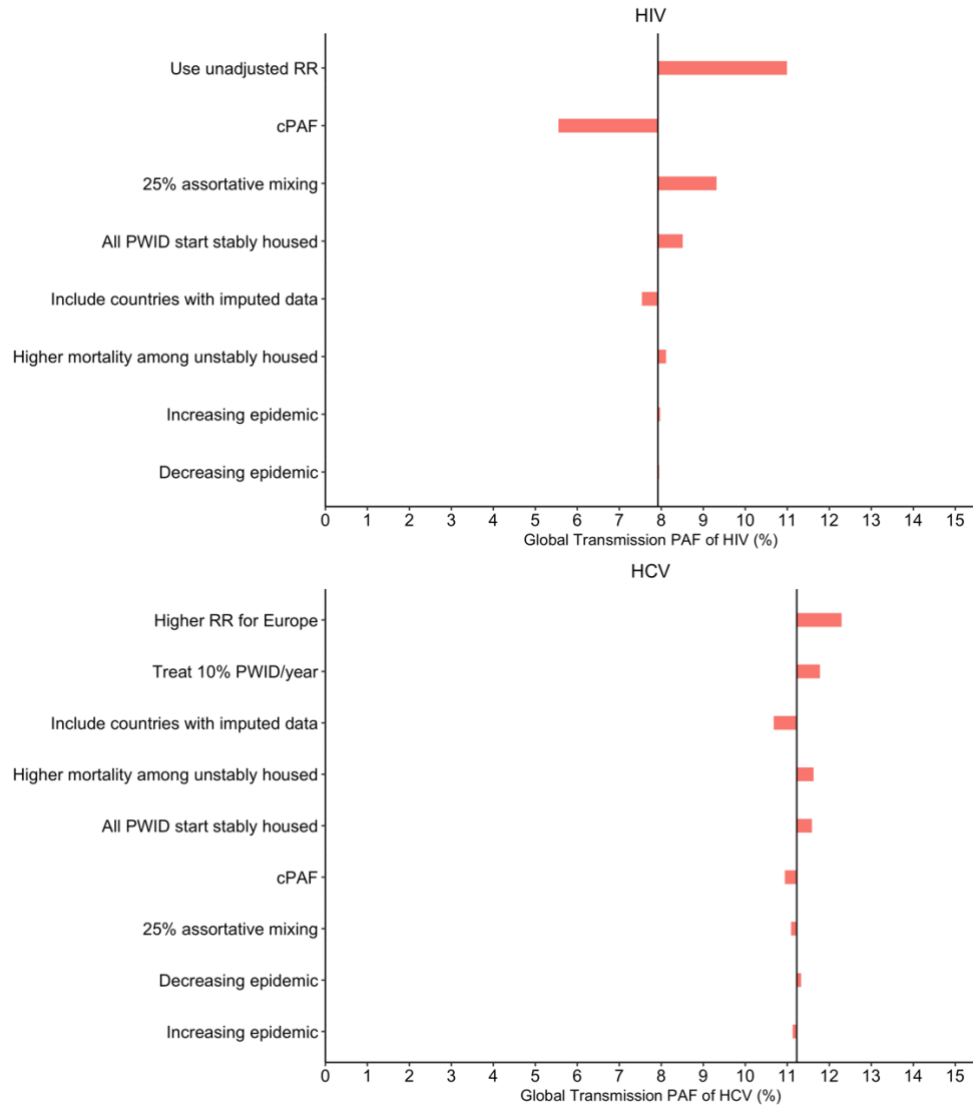

## References

1. Degenhardt L, Peacock A, Colledge S, et al. Global prevalence of injecting drug use and sociodemographic characteristics and prevalence of HIV, HBV, and HCV in people who inject drugs: a multistage systematic review. *Lancet Glob Health* 2017; **5**(12): e1192-e207.
2. Hines LA, Trickey A, Leung J, et al. Associations between national development indicators and the age profile of people who inject drugs: results from a global systematic review and meta-analysis. *Lancet Glob Health* 2020; **8**(1): e76-e91.
3. Mumtaz GR, Weiss HA, Thomas SL, et al. HIV among people who inject drugs in the Middle East and North Africa: systematic review and data synthesis. *PLoS Med* 2014; **11**(6): e1001663.
4. Arum C, Fraser H, Artenie AA, et al. Homelessness, unstable housing, and risk of HIV and hepatitis C virus acquisition among people who inject drugs: a systematic review and meta-analysis. *The Lancet Public Health* 2021; **6**(5): e309-e23.
